# Supplementary material for: Temporal dynamics of gene expression in heat-stressed Caenorhabditis elegans
Source: PLoS One. 2017 Dec 11;12(12):e0189445. doi: 10.1371/journal.pone.0189445 (PMC5724892; doi:10.1371/journal.pone.0189445)
Supplement: S1 Table — (XLSX) [file pone.0189445.s004.xlsx]

## Sheet: Gene sets
Cluster 1	Cluster 2	Cluster 3	Cluster 4	Cluster 5	Cluster 6	Late down	Late up
WBGene00022156	WBGene00001891	WBGene00022951	WBGene00004056	WBGene00004679	WBGene00015704	WBGene00044210	WBGene00020300
WBGene00016535	WBGene00017834	WBGene00012819	WBGene00015099	WBGene00044191	WBGene00017240	WBGene00001032	WBGene00016115
WBGene00016201	WBGene00044180	WBGene00002026	WBGene00011796	WBGene00003234	WBGene00013980	WBGene00016535	WBGene00018967
WBGene00000740	WBGene00020961	WBGene00009180	WBGene00004501	WBGene00020101	WBGene00020559	WBGene00016201	WBGene00007187
WBGene00016645	WBGene00023238	WBGene00045168	WBGene00004007	WBGene00010579	WBGene00016355	WBGene00017159	WBGene00020090
WBGene00001714	WBGene00011770	WBGene00011770	WBGene00015478	WBGene00017389	WBGene00014300	WBGene00000740	WBGene00012717
WBGene00003102	WBGene00009052	WBGene00008836	WBGene00001032	WBGene00017058	WBGene00001430	WBGene00016645	WBGene00044392
WBGene00005018	WBGene00011949	WBGene00009069	WBGene00014235	WBGene00020678	WBGene00020128	WBGene00016355	WBGene00001483
WBGene00001719	WBGene00001444	WBGene00044180	WBGene00016271	WBGene00014002	WBGene00010148	WBGene00000699	WBGene00015424
WBGene00008707	WBGene00020861	WBGene00022629	WBGene00021358	WBGene00000423	WBGene00002065	WBGene00003970	WBGene00008484
WBGene00000719	WBGene00019772	WBGene00002013	WBGene00007351	WBGene00020530	WBGene00011285	WBGene00003102	WBGene00010608
WBGene00004300	WBGene00002024	WBGene00021382	WBGene00007698	WBGene00044605	WBGene00009027	WBGene00001163	WBGene00018497
WBGene00000620	WBGene00001910	WBGene00045095	WBGene00003630	WBGene00004766	WBGene00011235	WBGene00005018	WBGene00016621
WBGene00015002	WBGene00011663	WBGene00016072	WBGene00000053	WBGene00012755	WBGene00003837	WBGene00008032	WBGene00014095
WBGene00012443	WBGene00003170	WBGene00016529	WBGene00008788	WBGene00014964	WBGene00019957	WBGene00001719	WBGene00004380
WBGene00007999	WBGene00019279	WBGene00022693	WBGene00016218	WBGene00018307	WBGene00007495	WBGene00008707	WBGene00004271
WBGene00017748	WBGene00001915	WBGene00006650	WBGene00017836	WBGene00021816	WBGene00022231	WBGene00021486	WBGene00008836
WBGene00017560	WBGene00016115	WBGene00021577	WBGene00003576	WBGene00014754	WBGene00011095	WBGene00000719	WBGene00010425
WBGene00044163	WBGene00011737	WBGene00009588	WBGene00003699	WBGene00001454	WBGene00010963	WBGene00004300	WBGene00017696
WBGene00008089	WBGene00018967	WBGene00012621	WBGene00021546	WBGene00010417	WBGene00012168	WBGene00015002	WBGene00012277
WBGene00011501	WBGene00022982	WBGene00013154	WBGene00003396	WBGene00023417	WBGene00008549	WBGene00012443	WBGene00010593
WBGene00016018	WBGene00022951	WBGene00014589	WBGene00018219	WBGene00012965	WBGene00009493	WBGene00015887	WBGene00015291
WBGene00001702	WBGene00015136	WBGene00004677	WBGene00011180	WBGene00044070	WBGene00011441	WBGene00007999	WBGene00012994
WBGene00018144	WBGene00011185	WBGene00077528	WBGene00044299	WBGene00044431	WBGene00012018	WBGene00017748	WBGene00007110
WBGene00004998	WBGene00007632	WBGene00016036	WBGene00021524	WBGene00021260	WBGene00022336	WBGene00021213	WBGene00007099
WBGene00007149	WBGene00019233	WBGene00012618	WBGene00004226	WBGene00000235	WBGene00007455	WBGene00017560	WBGene00001444
WBGene00000618	WBGene00001942	WBGene00045238	WBGene00003793	WBGene00044921	WBGene00010621	WBGene00003239	WBGene00020208
WBGene00003762	WBGene00012717	WBGene00021098	WBGene00000232	WBGene00002269	WBGene00045407	WBGene00044163	WBGene00009531
WBGene00007402	WBGene00010348	WBGene00014322	WBGene00016282	WBGene00001510	WBGene00003986	WBGene00015010	WBGene00013826
WBGene00016396	WBGene00005663	WBGene00008750	WBGene00002031	WBGene00044257	WBGene00015096	WBGene00000743	WBGene00011858
WBGene00010368	WBGene00044392	WBGene00011231	WBGene00016435	WBGene00008063	WBGene00007959	WBGene00016018	WBGene00013531
WBGene00015339	WBGene00018114	WBGene00045272	WBGene00007011	WBGene00022072	WBGene00044774	WBGene00001702	WBGene00001832
WBGene00001429	WBGene00000378	WBGene00045162	WBGene00001366	WBGene00001805	WBGene00008566	WBGene00018144	WBGene00013445
WBGene00016069	WBGene00050946	WBGene00009589	WBGene00019480	WBGene00002152	WBGene00009783	WBGene00004998	WBGene00000170
WBGene00000969	WBGene00044472	WBGene00045366	WBGene00013946	WBGene00015011	WBGene00010630	WBGene00007149	WBGene00009584
WBGene00044641	WBGene00006980	WBGene00044443	WBGene00021057	WBGene00019131	WBGene00010918	WBGene00000618	WBGene00003421
WBGene00011831	WBGene00003844	WBGene00001076	WBGene00008774	WBGene00009617	WBGene00009902	WBGene00003762	WBGene00017078
WBGene00018465	WBGene00012037	WBGene00201151	WBGene00003648	WBGene00014826	WBGene00003007	WBGene00007402	WBGene00004333
WBGene00044445	WBGene00013483	WBGene00021599	WBGene00001028	WBGene00012277	WBGene00002097	WBGene00023500	WBGene00012030
WBGene00011226	WBGene00020761	WBGene00012195	WBGene00045056	WBGene00013248	WBGene00010135	WBGene00022848	WBGene00008767
WBGene00195068	WBGene00045167	WBGene00195016	WBGene00006402	WBGene00004432	WBGene00009260	WBGene00010368	WBGene00022462
WBGene00044533	WBGene00012942	WBGene00007682	WBGene00016657	WBGene00008352	WBGene00002081	WBGene00015339	WBGene00013289
WBGene00015789	WBGene00000780	WBGene00045082	WBGene00013308	WBGene00013758	WBGene00021533	WBGene00001429	WBGene00000531
WBGene00008284	WBGene00001921	WBGene00019858	WBGene00003615	WBGene00010968	WBGene00011723	WBGene00000133	WBGene00002998
WBGene00010509	WBGene00050917	WBGene00004744	WBGene00004705	WBGene00021112	WBGene00001518	WBGene00016069	WBGene00021011
WBGene00045396	WBGene00018519	WBGene00020429	WBGene00001491	WBGene00017168	WBGene00021146	WBGene00010470	WBGene00008580
WBGene00003485	WBGene00016574	WBGene00007723	WBGene00011511	WBGene00007965	WBGene00010296	WBGene00044641	WBGene00006779
WBGene00003767	WBGene00006763	WBGene00021050	WBGene00015887	WBGene00016289	WBGene00000479	WBGene00011226	WBGene00016106
WBGene00009528	WBGene00016509	WBGene00021851	WBGene00022585	WBGene00020300	WBGene00002066	WBGene00195068	WBGene00013681
WBGene00000601	WBGene00019719	WBGene00009692	WBGene00004831	WBGene00003522	WBGene00013716	WBGene00004191	WBGene00017964
WBGene00010595	WBGene00012140	WBGene00013155	WBGene00016407	WBGene00043060	WBGene00007175	WBGene00044533	WBGene00001854
WBGene00012783	WBGene00010269	WBGene00014542	WBGene00004326	WBGene00000801	WBGene00010055	WBGene00015789	WBGene00016529
WBGene00001733	WBGene00001108	WBGene00016115	WBGene00021709	WBGene00014941	WBGene00008265	WBGene00021146	WBGene00019328
WBGene00014185	WBGene00019604	WBGene00008577	WBGene00006750	WBGene00015706	WBGene00008803	WBGene00008284	WBGene00011109
WBGene00007395	WBGene00022789		WBGene00001759	WBGene00002110	WBGene00003214	WBGene00010509	WBGene00018806
WBGene00044395	WBGene00000737		WBGene00011143	WBGene00008169	WBGene00002105	WBGene00045396	WBGene00044325
WBGene00014052	WBGene00016481		WBGene00018173	WBGene00009223	WBGene00003553	WBGene00003485	WBGene00016073
WBGene00022146	WBGene00018591		WBGene00001994	WBGene00007187	WBGene00004062	WBGene00003767	WBGene00001590
WBGene00020311	WBGene00023382		WBGene00006913	WBGene00019140	WBGene00022816	WBGene00009528	WBGene00019941
WBGene00010467	WBGene00008130		WBGene00018005	WBGene00017238	WBGene00009158	WBGene00010055	WBGene00019441
WBGene00005016	WBGene00015291		WBGene00021213	WBGene00003075	WBGene00013901	WBGene00003214	WBGene00017658
WBGene00000984	WBGene00023287		WBGene00006464	WBGene00044350	WBGene00021963	WBGene00000601	WBGene00008170
WBGene00012257	WBGene00016784		WBGene00020216	WBGene00020455	WBGene00017046	WBGene00011820	WBGene00011945
WBGene00002393	WBGene00044724		WBGene00017686	WBGene00015185	WBGene00016094	WBGene00012152	WBGene00020297
WBGene00015182	WBGene00018804		WBGene00000280	WBGene00009333	WBGene00001612	WBGene00001733	WBGene00019092
WBGene00002259	WBGene00012591		WBGene00022292	WBGene00018595	WBGene00000047	WBGene00014185	WBGene00001942
WBGene00009980	WBGene00014793		WBGene00008924	WBGene00022737	WBGene00007343	WBGene00007395	WBGene00004336
WBGene00010661	WBGene00020226		WBGene00001516	WBGene00010479	WBGene00002178	WBGene00014052	WBGene00022213
WBGene00000625	WBGene00001909		WBGene00002030	WBGene00007223	WBGene00012532	WBGene00008486	WBGene00012097
WBGene00018656	WBGene00012813		WBGene00021412	WBGene00009521	WBGene00004058	WBGene00020311	WBGene00015440
WBGene00017583	WBGene00044638		WBGene00019896	WBGene00018014	WBGene00003656	WBGene00022631	WBGene00022101
WBGene00014055	WBGene00019259		WBGene00021379	WBGene00000556	WBGene00010967	WBGene00005016	WBGene00008174
WBGene00000649	WBGene00018477		WBGene00009148	WBGene00000787	WBGene00008692	WBGene00013284	WBGene00012273
WBGene00000221	WBGene00018725		WBGene00011140	WBGene00014975	WBGene00007599	WBGene00009533	WBGene00011369
WBGene00001761	WBGene00019372		WBGene00019213	WBGene00021371	WBGene00022245	WBGene00000984	WBGene00002189
WBGene00009982	WBGene00007553		WBGene00022680	WBGene00011959	WBGene00007330	WBGene00012304	WBGene00044465
WBGene00015163	WBGene00010476		WBGene00011589	WBGene00021103	WBGene00018174	WBGene00012257	WBGene00019068
WBGene00010604	WBGene00002012		WBGene00044015	WBGene00017592	WBGene00006920	WBGene00015046	WBGene00003132
WBGene00000437	WBGene00007007		WBGene00044788	WBGene00019361	WBGene00003728	WBGene00002393	WBGene00001401
WBGene00044463	WBGene00017304		WBGene00003978	WBGene00015385	WBGene00007210	WBGene00015182	WBGene00008536
WBGene00045387	WBGene00050935		WBGene00011871	WBGene00010019	WBGene00014009	WBGene00002259	WBGene00016799
WBGene00000741	WBGene00045168		WBGene00007524	WBGene00044607	WBGene00008985	WBGene00009980	WBGene00002033
WBGene00011314	WBGene00010374		WBGene00003167	WBGene00003902	WBGene00003721	WBGene00016989	WBGene00021506
WBGene00012255	WBGene00001913		WBGene00005758	WBGene00022268	WBGene00016431	WBGene00010661	WBGene00044987
WBGene00018985	WBGene00009584		WBGene00015010	WBGene00003884	WBGene00020408	WBGene00019329	WBGene00014589
WBGene00020148	WBGene00018465		WBGene00000995	WBGene00012459	WBGene00006510	WBGene00006890	WBGene00006385
WBGene00175027	WBGene00022091		WBGene00005832	WBGene00006810	WBGene00018295	WBGene00021348	WBGene00015680
WBGene00008448	WBGene00005833		WBGene00000238	WBGene00015393	WBGene00008511	WBGene00000625	WBGene00077458
WBGene00020250	WBGene00017058		WBGene00007755	WBGene00004092	WBGene00045013	WBGene00018656	WBGene00044501
WBGene00001389	WBGene00001938		WBGene00013379	WBGene00023458	WBGene00004345	WBGene00017583	WBGene00194707
WBGene00000610	WBGene00009156		WBGene00004301	WBGene00011611	WBGene00017881	WBGene00014055	WBGene00016930
WBGene00044169	WBGene00000531		WBGene00020509	WBGene00005344	WBGene00013025	WBGene00011119	WBGene00000499
WBGene00007988	WBGene00045082		WBGene00015965	WBGene00021370	WBGene00006921	WBGene00004194	WBGene00022048
WBGene00020062	WBGene00021011		WBGene00019924	WBGene00015207	WBGene00022037	WBGene00000649	WBGene00006374
WBGene00000733	WBGene00023066		WBGene00011924	WBGene00010232	WBGene00015019	WBGene00000221	WBGene00019264
WBGene00019609	WBGene00021876		WBGene00006566	WBGene00001448	WBGene00011189	WBGene00001761	WBGene00045082
WBGene00000693	WBGene00014454		WBGene00015396	WBGene00020587	WBGene00001055	WBGene00009982	WBGene00001514
WBGene00000656	WBGene00001854		WBGene00003925	WBGene00018701	WBGene00018958	WBGene00013331	WBGene00012337
WBGene00020873	WBGene00012216		WBGene00018089	WBGene00013181	WBGene00000988	WBGene00018031	WBGene00021418
WBGene00013986	WBGene00003695		WBGene00045105	WBGene00050911	WBGene00077764	WBGene00015163	WBGene00012323
WBGene00001064	WBGene00017456		WBGene00020529	WBGene00001236	WBGene00004267	WBGene00006921	WBGene00016036
WBGene00000115	WBGene00008674		WBGene00004190	WBGene00013573	WBGene00017658	WBGene00007430	WBGene00008172
WBGene00000245	WBGene00012273		WBGene00004015	WBGene00044200	WBGene00004219	WBGene00006518	WBGene00004136
WBGene00044788	WBGene00001451		WBGene00015754	WBGene00000028	WBGene00003813	WBGene00010604	WBGene00015293
WBGene00018027	WBGene00011591		WBGene00019479	WBGene00003759	WBGene00003089	WBGene00000437	WBGene00000866
WBGene00014182	WBGene00016584		WBGene00044544	WBGene00044500	WBGene00011507	WBGene00044463	WBGene00001890
WBGene00000720	WBGene00008738		WBGene00044701	WBGene00019305	WBGene00001581	WBGene00045387	WBGene00009937
WBGene00019489	WBGene00018026		WBGene00001574	WBGene00003098	WBGene00020693	WBGene00000741	WBGene00012148
WBGene00001725	WBGene00003534		WBGene00014065	WBGene00044514	WBGene00018256	WBGene00011314	WBGene00018511
WBGene00020921	WBGene00019944		WBGene00021059	WBGene00022569	WBGene00011827	WBGene00018510	WBGene00014955
WBGene00009400	WBGene00016117		WBGene00000983	WBGene00002108	WBGene00019289	WBGene00018985	WBGene00019278
WBGene00015647	WBGene00018782		WBGene00011629	WBGene00001914	WBGene00011971	WBGene00000988	WBGene00007966
WBGene00009157	WBGene00003954		WBGene00044792	WBGene00013622	WBGene00020307	WBGene00017658	WBGene00015239
WBGene00044779	WBGene00000915		WBGene00012042	WBGene00015238	WBGene00003528	WBGene00004219	WBGene00019833
WBGene00003057	WBGene00018660		WBGene00001184	WBGene00017306	WBGene00016664	WBGene00007420	WBGene00012181
WBGene00001479	WBGene00015843		WBGene00007684	WBGene00011295	WBGene00010383	WBGene00175027	WBGene00044916
WBGene00012118	WBGene00023193		WBGene00007330	WBGene00019574	WBGene00004230	WBGene00020250	WBGene00019544
WBGene00021975	WBGene00044743		WBGene00003772	WBGene00021831	WBGene00000443	WBGene00045246	WBGene00020678
WBGene00008742	WBGene00007366		WBGene00001593	WBGene00004169	WBGene00001508	WBGene00001389	WBGene00018668
WBGene00020040	WBGene00009724		WBGene00008911	WBGene00001483	WBGene00015795	WBGene00000610	WBGene00018221
WBGene00004769	WBGene00001160		WBGene00000441	WBGene00002050	WBGene00016103	WBGene00044169	WBGene00023326
WBGene00018297	WBGene00016061		WBGene00002109	WBGene00017941	WBGene00004788	WBGene00016657	WBGene00014322
WBGene00011927	WBGene00012821		WBGene00009200	WBGene00019006	WBGene00077553	WBGene00007988	WBGene00013727
WBGene00000959	WBGene00020349		WBGene00020594	WBGene00044581	WBGene00001501	WBGene00020062	WBGene00006495
WBGene00001072	WBGene00002263		WBGene00008262	WBGene00004418	WBGene00008258	WBGene00000733	WBGene00002110
WBGene00000063	WBGene00013254		WBGene00008997	WBGene00019141	WBGene00002238	WBGene00019609	WBGene00019719
WBGene00013180	WBGene00077458		WBGene00003843	WBGene00009476	WBGene00000523	WBGene00007885	WBGene00016099
WBGene00000073	WBGene00009218		WBGene00016867	WBGene00017060	WBGene00020696	WBGene00000693	WBGene00022093
WBGene00010742	WBGene00001936		WBGene00014125	WBGene00006741	WBGene00008495	WBGene00000656	WBGene00002136
WBGene00020646	WBGene00019760		WBGene00011932	WBGene00021046	WBGene00020380	WBGene00019382	WBGene00020346
WBGene00000526	WBGene00004495		WBGene00008798	WBGene00013866	WBGene00002717	WBGene00018111	WBGene00012640
WBGene00021379	WBGene00044501		WBGene00021136	WBGene00010480	WBGene00007143	WBGene00020873	WBGene00002254
WBGene00012791	WBGene00007216		WBGene00045024	WBGene00016159	WBGene00015695	WBGene00013986	WBGene00011600
WBGene00014183	WBGene00016213		WBGene00016345	WBGene00007603	WBGene00000017	WBGene00003528	WBGene00194892
WBGene00007958	WBGene00017168		WBGene00019391	WBGene00021350	WBGene00020567	WBGene00000245	WBGene00006780
WBGene00045246	WBGene00002102		WBGene00019932	WBGene00004249	WBGene00009190	WBGene00000720	WBGene00010178
WBGene00023492	WBGene00009113		WBGene00011273	WBGene00001137	WBGene00018657	WBGene00019489	WBGene00002108
WBGene00017201	WBGene00010484		WBGene00044681	WBGene00002143	WBGene00022103	WBGene00001725	WBGene00020732
WBGene00004359	WBGene00001564		WBGene00020825	WBGene00017852	WBGene00000425	WBGene00020921	WBGene00015974
WBGene00021690	WBGene00020725		WBGene00021852	WBGene00001462	WBGene00008233	WBGene00015647	WBGene00020012
WBGene00020418	WBGene00001919		WBGene00020504	WBGene00022379	WBGene00009624	WBGene00044779	WBGene00009929
WBGene00021625	WBGene00008592		WBGene00006380	WBGene00015518	WBGene00010784	WBGene00003057	WBGene00044719
WBGene00009986	WBGene00017927		WBGene00016603	WBGene00011791	WBGene00006949	WBGene00012118	WBGene00019836
WBGene00020049	WBGene00012456		WBGene00002089	WBGene00021235	WBGene00002199	WBGene00021975	WBGene00007001
WBGene00001730	WBGene00045052		WBGene00022593	WBGene00045304	WBGene00004141	WBGene00008742	WBGene00008251
WBGene00013046	WBGene00012745		WBGene00010214	WBGene00000870	WBGene00019249	WBGene00000523	WBGene00009192
WBGene00045146	WBGene00003834		WBGene00018860	WBGene00000146	WBGene00022270	WBGene00004769	WBGene00008722
WBGene00000596	WBGene00004136		WBGene00012289	WBGene00044727	WBGene00017968	WBGene00006727	WBGene00019713
WBGene00014006	WBGene00001890		WBGene00017033	WBGene00023241	WBGene00011676	WBGene00011927	WBGene00004993
WBGene00018380	WBGene00009604		WBGene00021058	WBGene00015346	WBGene00002173	WBGene00000017	WBGene00017834
WBGene00012293	WBGene00012965		WBGene00010575	WBGene00013387	WBGene00018634	WBGene00000959	WBGene00003085
WBGene00045024	WBGene00000391		WBGene00023500	WBGene00009222	WBGene00007916	WBGene00000064	WBGene00022607
WBGene00009964	WBGene00010232		WBGene00022848	WBGene00015565	WBGene00009642	WBGene00016258	WBGene00012585
WBGene00008215	WBGene00007966		WBGene00003775	WBGene00007299	WBGene00007240	WBGene00012938	WBGene00001482
WBGene00012261	WBGene00016637		WBGene00010144	WBGene00044608	WBGene00013385	WBGene00000073	WBGene00001726
WBGene00011055	WBGene00022887		WBGene00002242	WBGene00002992	WBGene00010525	WBGene00010742	WBGene00023239
WBGene00020917	WBGene00008850		WBGene00009738	WBGene00022401	WBGene00009304	WBGene00012554	WBGene00002012
WBGene00013263	WBGene00012181		WBGene00008571	WBGene00000877	WBGene00011090	WBGene00019184	WBGene00011116
WBGene00022258	WBGene00000534		WBGene00012221	WBGene00008339	WBGene00012143	WBGene00020646	WBGene00018868
WBGene00014148	WBGene00007183		WBGene00003024	WBGene00009439	WBGene00012793	WBGene00018694	WBGene00010053
WBGene00010835	WBGene00000650		WBGene00006687	WBGene00022441	WBGene00021407	WBGene00015942	WBGene00017219
WBGene00020566	WBGene00017297		WBGene00018827	WBGene00022970	WBGene00010214	WBGene00003476	WBGene00004360
WBGene00000679	WBGene00012600		WBGene00016902	WBGene00015707	WBGene00008446	WBGene00000526	WBGene00009069
WBGene00011561	WBGene00001892		WBGene00004311	WBGene00015617	WBGene00020197	WBGene00021379	WBGene00017549
WBGene00000603	WBGene00014947		WBGene00022623	WBGene00010639	WBGene00022313	WBGene00007958	WBGene00022280
WBGene00044210	WBGene00023326		WBGene00007207	WBGene00003600	WBGene00004911	WBGene00001428	WBGene00013111
WBGene00000609	WBGene00012005		WBGene00001589	WBGene00010973	WBGene00017313	WBGene00023492	WBGene00012527
WBGene00016657	WBGene00020732		WBGene00002211	WBGene00003589	WBGene00018569	WBGene00017201	WBGene00003495
WBGene00012256	WBGene00023084		WBGene00044774	WBGene00007555	WBGene00015693	WBGene00020036	WBGene00011282
WBGene00005421	WBGene00017833		WBGene00000133	WBGene00007859	WBGene00003482	WBGene00012143	WBGene00012976
WBGene00018219	WBGene00019243		WBGene00006643	WBGene00023319	WBGene00004893	WBGene00012497	WBGene00016614
WBGene00010472	WBGene00016991		WBGene00006784	WBGene00011626	WBGene00020902	WBGene00004359	WBGene00009919
WBGene00010567	WBGene00022581		WBGene00050967	WBGene00008484	WBGene00006917	WBGene00015369	WBGene00021560
WBGene00001077	WBGene00019890		WBGene00010216	WBGene00021352	WBGene00004059	WBGene00008446	WBGene00011383
WBGene00020039	WBGene00012601		WBGene00018160	WBGene00021758	WBGene00050970	WBGene00021018	WBGene00020111
WBGene00014090	WBGene00013735		WBGene00020324	WBGene00044122	WBGene00003254	WBGene00019620	WBGene00086551
WBGene00009620	WBGene00007704		WBGene00001426	WBGene00003180	WBGene00011393	WBGene00021625	WBGene00011376
WBGene00077690	WBGene00001030		WBGene00004876	WBGene00020089	WBGene00000528	WBGene00009986	WBGene00007762
WBGene00012796	WBGene00023351		WBGene00077559	WBGene00012512	WBGene00011182	WBGene00015693	WBGene00008191
WBGene00015291	WBGene00012145		WBGene00006575	WBGene00018223	WBGene00000908	WBGene00020049	WBGene00006759
WBGene00020052	WBGene00012158		WBGene00011554	WBGene00014193	WBGene00009342	WBGene00022104	WBGene00050948
WBGene00009261	WBGene00020947		WBGene00008800	WBGene00022494	WBGene00018576	WBGene00001730	WBGene00022522
WBGene00000176	WBGene00014589		WBGene00009657	WBGene00019301	WBGene00043097	WBGene00006917	WBGene00018698
WBGene00000622	WBGene00022713		WBGene00015617	WBGene00044216	WBGene00006681	WBGene00011831	WBGene00003157
WBGene00017052	WBGene00006448		WBGene00008122	WBGene00012424	WBGene00008707	WBGene00019232	WBGene00013315
WBGene00044530	WBGene00011662		WBGene00007071	WBGene00004164	WBGene00000914	WBGene00013046	WBGene00015565
WBGene00185014	WBGene00004429		WBGene00009347	WBGene00022883	WBGene00008905	WBGene00020784	WBGene00016318
WBGene00011112	WBGene00012980		WBGene00009586	WBGene00044513	WBGene00020258	WBGene00000750	WBGene00022386
WBGene00010888	WBGene00010977		WBGene00009323	WBGene00017698	WBGene00003610	WBGene00045146	WBGene00012435
WBGene00008390	WBGene00008190		WBGene00045456	WBGene00002046	WBGene00022024	WBGene00009483	WBGene00013730
WBGene00000556	WBGene00012640		WBGene00016415	WBGene00010608	WBGene00019515	WBGene00018380	WBGene00022660
WBGene00013481	WBGene00014852		WBGene00008287	WBGene00017297	WBGene00011400	WBGene00020169	WBGene00006408
WBGene00019627	WBGene00018288		WBGene00012807	WBGene00019278	WBGene00008953	WBGene00009964	WBGene00000065
WBGene00007486	WBGene00006624		WBGene00044303	WBGene00018497	WBGene00018573	WBGene00008215	WBGene00013109
WBGene00007869	WBGene00002108		WBGene00006428	WBGene00004409	WBGene00007947	WBGene00011055	WBGene00201151
WBGene00011760	WBGene00016434		WBGene00018900	WBGene00012155	WBGene00020506	WBGene00001760	WBGene00016855
WBGene00019754	WBGene00045412		WBGene00009678	WBGene00005602	WBGene00000164	WBGene00004801	WBGene00020712
WBGene00007804	WBGene00002189		WBGene00009798	WBGene00019103	WBGene00013457	WBGene00022158	WBGene00014207
WBGene00009916	WBGene00001904		WBGene00007507	WBGene00019240	WBGene00007384	WBGene00020917	WBGene00012037
WBGene00017307	WBGene00021653		WBGene00006676	WBGene00013679	WBGene00013321	WBGene00013263	WBGene00003604
WBGene00001993	WBGene00017488		WBGene00003029	WBGene00003161	WBGene00009200	WBGene00022258	WBGene00015938
WBGene00001074	WBGene00044644		WBGene00013116	WBGene00020260	WBGene00006593	WBGene00017464	WBGene00008173
WBGene00000673	WBGene00012101		WBGene00019953	WBGene00044438	WBGene00010803	WBGene00014148	WBGene00001232
WBGene00000857	WBGene00013808		WBGene00008643	WBGene00008376	WBGene00011965	WBGene00020566	WBGene00023399
WBGene00011416	WBGene00010752		WBGene00018338	WBGene00012624	WBGene00044667	WBGene00019627	WBGene00022113
WBGene00009915	WBGene00016230		WBGene00000059	WBGene00014246	WBGene00003658	WBGene00044559	WBGene00007266
WBGene00000747	WBGene00004700		WBGene00014989	WBGene00004408	WBGene00000550	WBGene00000679	WBGene00015677
WBGene00003112	WBGene00011300		WBGene00009443	WBGene00016621	WBGene00001149	WBGene00011561	WBGene00013131
WBGene00004364	WBGene00013840		WBGene00012396	WBGene00007877	WBGene00001331	WBGene00019525	WBGene00015546
WBGene00020626	WBGene00014155		WBGene00020607	WBGene00002179	WBGene00001169	WBGene00000603	WBGene00017513
WBGene00019212	WBGene00050930		WBGene00007984	WBGene00003761	WBGene00019617	WBGene00000609	WBGene00010049
WBGene00000992	WBGene00022607		WBGene00012893	WBGene00015658	WBGene00015197	WBGene00007275	WBGene00012715
WBGene00011284	WBGene00007713		WBGene00015085	WBGene00022198	WBGene00022679	WBGene00010472	WBGene00006787
WBGene00003769	WBGene00001726		WBGene00016631	WBGene00194707	WBGene00010288	WBGene00021883	WBGene00012073
WBGene00000727	WBGene00011254		WBGene00004117	WBGene00001794	WBGene00010335	WBGene00021548	WBGene00009393
WBGene00015088	WBGene00023239		WBGene00044452	WBGene00021474	WBGene00007252	WBGene00003548	WBGene00012110
WBGene00006947	WBGene00000211		WBGene00012518	WBGene00011206	WBGene00001648	WBGene00017961	WBGene00014730
WBGene00000742	WBGene00021843		WBGene00013534	WBGene00013243	WBGene00010961	WBGene00010567	WBGene00020429
WBGene00017577	WBGene00008955		WBGene00012123	WBGene00017460	WBGene00015841	WBGene00001077	WBGene00001933
WBGene00007257	WBGene00011116		WBGene00016773	WBGene00020112	WBGene00044071	WBGene00014090	WBGene00021681
WBGene00000713	WBGene00018868		WBGene00008453	WBGene00017126	WBGene00014989	WBGene00009620	WBGene00119201
WBGene00022131	WBGene00001311		WBGene00020921	WBGene00000046	WBGene00004218	WBGene00077690	WBGene00001336
WBGene00007820	WBGene00011573		WBGene00007041	WBGene00021040	WBGene00044791	WBGene00017704	WBGene00018500
WBGene00010422	WBGene00012620		WBGene00017653	WBGene00018026	WBGene00004364	WBGene00012796	WBGene00019801
WBGene00018282	WBGene00006169		WBGene00018206	WBGene00000082	WBGene00016151	WBGene00020033	WBGene00020168
WBGene00009983	WBGene00000056		WBGene00007598	WBGene00021872	WBGene00010904	WBGene00015291	WBGene00018483
WBGene00019963	WBGene00194713		WBGene00002244	WBGene00008117	WBGene00002991	WBGene00020052	WBGene00017461
WBGene00019236	WBGene00001784		WBGene00000253	WBGene00022493	WBGene00009722	WBGene00000622	WBGene00018118
WBGene00007203	WBGene00001932		WBGene00045050	WBGene00022473	WBGene00012123	WBGene00008528	WBGene00006394
WBGene00000928	WBGene00017949		WBGene00010965	WBGene00004991	WBGene00008110	WBGene00044530	WBGene00001393
WBGene00000666	WBGene00006449		WBGene00010268	WBGene00010439	WBGene00011763	WBGene00045177	WBGene00007841
WBGene00050943	WBGene00006650		WBGene00008624	WBGene00010297	WBGene00003545	WBGene00185014	WBGene00017245
WBGene00044612	WBGene00020912		WBGene00006671	WBGene00004145	WBGene00011713	WBGene00008917	WBGene00000869
WBGene00009142	WBGene00009205		WBGene00014569	WBGene00008447	WBGene00000198	WBGene00011112	WBGene00001228
WBGene00022274	WBGene00019668		WBGene00000491	WBGene00008389	WBGene00003690	WBGene00010888	WBGene00007993
WBGene00011753	WBGene00000498		WBGene00007957	WBGene00012930	WBGene00011093	WBGene00003654	WBGene00044686
WBGene00014150	WBGene00020007		WBGene00017855	WBGene00022745	WBGene00014092	WBGene00013481	WBGene00007325
WBGene00009281	WBGene00020744		WBGene00015507	WBGene00050885	WBGene00009717	WBGene00016192	WBGene00000987
WBGene00009621	WBGene00010057		WBGene00008622	WBGene00017045	WBGene00006816	WBGene00007486	WBGene00014542
WBGene00009356	WBGene00013163		WBGene00018853	WBGene00012478	WBGene00009977	WBGene00044324	WBGene00016159
WBGene00016505	WBGene00077704		WBGene00001017	WBGene00008367	WBGene00009823	WBGene00014003	WBGene00022525
WBGene00045269	WBGene00003025		WBGene00011798	WBGene00012666	WBGene00019761	WBGene00011760	WBGene00001402
WBGene00018765	WBGene00013559		WBGene00012967	WBGene00013054	WBGene00015043	WBGene00019754	WBGene00011385
WBGene00022517	WBGene00007682		WBGene00002037	WBGene00014518	WBGene00009142	WBGene00007804	WBGene00023209
WBGene00012917	WBGene00012329		WBGene00015928	WBGene00004380	WBGene00017506	WBGene00017307	WBGene00016022
WBGene00017218	WBGene00011557		WBGene00001085	WBGene00004271	WBGene00015648	WBGene00001993	WBGene00012370
WBGene00194674	WBGene00016250		WBGene00001594	WBGene00044265	WBGene00045177	WBGene00001772	WBGene00006825
WBGene00044553	WBGene00021271		WBGene00016003	WBGene00010193	WBGene00020216	WBGene00045386	WBGene00018114
WBGene00009818	WBGene00022522		WBGene00003418	WBGene00004475	WBGene00003786	WBGene00011995	WBGene00019593
WBGene00020497	WBGene00011230		WBGene00015531	WBGene00013598	WBGene00016769	WBGene00003526	WBGene00001446
WBGene00018250	WBGene00001896		WBGene00010620	WBGene00022055	WBGene00003958	WBGene00001074	WBGene00022727
WBGene00010225	WBGene00017659		WBGene00010051	WBGene00007797	WBGene00013878	WBGene00003676	WBGene00011886
WBGene00004164	WBGene00008662		WBGene00007150	WBGene00019725	WBGene00012615	WBGene00000673	WBGene00014915
WBGene00016659	WBGene00012240		WBGene00000411	WBGene00022562	WBGene00010251	WBGene00020418	WBGene00009442
WBGene00018359	WBGene00006611		WBGene00004378	WBGene00014058	WBGene00013740	WBGene00015048	WBGene00013442
WBGene00008032	WBGene00007535		WBGene00008338	WBGene00015386	WBGene00018871	WBGene00011416	WBGene00006587
WBGene00017262	WBGene00014836		WBGene00008018	WBGene00009478	WBGene00044394	WBGene00020397	WBGene00044391
WBGene00017212	WBGene00022660		WBGene00001328	WBGene00022582	WBGene00016977	WBGene00009915	WBGene00016586
WBGene00015512	WBGene00017921		WBGene00011820	WBGene00010212	WBGene00020082	WBGene00011864	WBGene00012879
WBGene00044086	WBGene00000065		WBGene00018548	WBGene00019193	WBGene00003609	WBGene00020315	WBGene00007414
WBGene00000711	WBGene00001075		WBGene00010386	WBGene00044189	WBGene00004358	WBGene00000747	WBGene00009888
WBGene00003765	WBGene00008944		WBGene00020025	WBGene00017347	WBGene00013007	WBGene00004364	WBGene00194993
WBGene00000882	WBGene00009069		WBGene00017580	WBGene00000843	WBGene00012853	WBGene00019212
WBGene00015514	WBGene00013244		WBGene00009783	WBGene00009828	WBGene00044043	WBGene00020166
WBGene00018487	WBGene00019468		WBGene00020638	WBGene00017358	WBGene00004004	WBGene00015088
WBGene00012007	WBGene00005902		WBGene00017489	WBGene00002123	WBGene00000939	WBGene00000992
WBGene00007934	WBGene00022472		WBGene00001518	WBGene00009578	WBGene00020846	WBGene00003104
WBGene00006592	WBGene00010071		WBGene00019128	WBGene00013335	WBGene00018138	WBGene00011284
WBGene00017506	WBGene00045411		WBGene00007756	WBGene00011531	WBGene00011222	WBGene00045397
WBGene00016920	WBGene00021253		WBGene00008365	WBGene00044150	WBGene00012760	WBGene00003769
WBGene00008320	WBGene00001908		WBGene00016244	WBGene00050948	WBGene00010012	WBGene00000727
WBGene00000157	WBGene00044549		WBGene00018334	WBGene00013408	WBGene00014003	WBGene00006947
WBGene00017756	WBGene00000558		WBGene00017583	WBGene00000768	WBGene00017702	WBGene00016916
WBGene00000684	WBGene00003604		WBGene00020800	WBGene00018647	WBGene00014165	WBGene00022683
WBGene00004397	WBGene00016260		WBGene00022875	WBGene00013724	WBGene00001240	WBGene00000742
WBGene00001694	WBGene00020030		WBGene00018064	WBGene00022089	WBGene00006363	WBGene00017577
WBGene00000979	WBGene00010831		WBGene00000240	WBGene00012933	WBGene00011920	WBGene00007257
WBGene00000696	WBGene00010585		WBGene00007006	WBGene00006510	WBGene00009482	WBGene00000713
WBGene00001070	WBGene00014181		WBGene00005646	WBGene00044441	WBGene00003661	WBGene00010422
WBGene00016749	WBGene00010546		WBGene00002220	WBGene00010593	WBGene00015783	WBGene00013083
WBGene00010267	WBGene00003165		WBGene00004214	WBGene00015541	WBGene00006876	WBGene00018282
WBGene00017446	WBGene00045169		WBGene00001989	WBGene00004704	WBGene00007108	WBGene00013724
WBGene00000669	WBGene00015546		WBGene00006529	WBGene00016766	WBGene00023491	WBGene00013704
WBGene00021745	WBGene00012604		WBGene00010893	WBGene00010814	WBGene00008978	WBGene00009983
WBGene00000702	WBGene00021478		WBGene00017642	WBGene00016702	WBGene00044631	WBGene00019963
WBGene00009944	WBGene00008602		WBGene00011462	WBGene00016885	WBGene00012610	WBGene00017244
WBGene00020445	WBGene00001885		WBGene00002007	WBGene00006492	WBGene00015206	WBGene00019236
WBGene00004311	WBGene00011435		WBGene00003394	WBGene00044756	WBGene00011099	WBGene00007203
WBGene00003763	WBGene00022746		WBGene00015040	WBGene00007195	WBGene00018356	WBGene00000753
WBGene00020335	WBGene00001893		WBGene00013318	WBGene00010587	WBGene00017567	WBGene00000666
WBGene00001067	WBGene00044391		WBGene00018218	WBGene00045391	WBGene00019074	WBGene00000512
WBGene00015645	WBGene00001940		WBGene00020556	WBGene00020808	WBGene00019746	WBGene00050943
WBGene00007903	WBGene00008317		WBGene00009543	WBGene00013569	WBGene00007549	WBGene00044612
WBGene00000616	WBGene00015111		WBGene00021644	WBGene00009113	WBGene00015577	WBGene00007270
WBGene00001071	WBGene00016508		WBGene00003165	WBGene00044977	WBGene00003526	WBGene00009142
WBGene00011642	WBGene00017611		WBGene00008923	WBGene00021224	WBGene00012782	WBGene00022274
WBGene00016914	WBGene00021029		WBGene00010044	WBGene00045078	WBGene00016641	WBGene00011753
WBGene00020784	WBGene00013045		WBGene00001377	WBGene00050890	WBGene00010238	WBGene00002974
WBGene00003768	WBGene00017728		WBGene00010342	WBGene00000510	WBGene00011953	WBGene00014150
WBGene00000968	WBGene00014730		WBGene00010178	WBGene00008118	WBGene00003552	WBGene00008914
WBGene00010001	WBGene00006953		WBGene00019395	WBGene00004279	WBGene00009543	WBGene00009621
WBGene00013173	WBGene00017729		WBGene00006946	WBGene00022292	WBGene00011738	WBGene00007421
WBGene00001065	WBGene00010740		WBGene00007753	WBGene00010776	WBGene00000179	WBGene00009356
WBGene00004897	WBGene00018590		WBGene00019942	WBGene00017354	WBGene00008732	WBGene00016505
WBGene00001699	WBGene00045164		WBGene00045460	WBGene00007985	WBGene00044021	WBGene00003925
WBGene00003511	WBGene00014472		WBGene00017051	WBGene00022631	WBGene00011147	WBGene00021646
WBGene00003887	WBGene00019664		WBGene00017651	WBGene00013721	WBGene00008800	WBGene00018765
WBGene00016283	WBGene00009277		WBGene00018246	WBGene00017909	WBGene00000215	WBGene00021521
WBGene00014668	WBGene00012969		WBGene00018953	WBGene00008872	WBGene00018841	WBGene00022517
WBGene00000660	WBGene00007841		WBGene00007347	WBGene00043279	WBGene00006220	WBGene00000728
WBGene00019525	WBGene00021851		WBGene00001680	WBGene00022275	WBGene00000514	WBGene00012917
WBGene00001608	WBGene00019511		WBGene00021539	WBGene00014234	WBGene00017891	WBGene00011418
WBGene00013633	WBGene00013563		WBGene00002850	WBGene00019978	WBGene00003477	WBGene00000420
WBGene00019663	WBGene00044686		WBGene00016620	WBGene00015050	WBGene00003547	WBGene00011501
WBGene00000990	WBGene00001912		WBGene00013276	WBGene00002270	WBGene00019620	WBGene00015777
WBGene00003766	WBGene00011866		WBGene00007059	WBGene00018742	WBGene00015403	WBGene00017218
WBGene00000697	WBGene00019651		WBGene00013962	WBGene00002210	WBGene00007755	WBGene00017734
WBGene00010539	WBGene00003161		WBGene00005978	WBGene00009742	WBGene00012035	WBGene00012185
WBGene00007996	WBGene00013706		WBGene00019301	WBGene00006919	WBGene00001690	WBGene00019662
WBGene00020947	WBGene00012338		WBGene00014764	WBGene00009531	WBGene00003849	WBGene00010317
WBGene00009813	WBGene00022525		WBGene00195076	WBGene00005663	WBGene00022793	WBGene00009818
WBGene00050875	WBGene00023209		WBGene00044058	WBGene00016040	WBGene00008977	WBGene00019730
WBGene00001976	WBGene00018268		WBGene00000159	WBGene00001911	WBGene00000067	WBGene00020497
WBGene00044396	WBGene00012840		WBGene00003539	WBGene00006512	WBGene00007753	WBGene00008296
WBGene00007925	WBGene00010234		WBGene00019950	WBGene00006533	WBGene00003104	WBGene00018250
WBGene00020083	WBGene00023331		WBGene00018623	WBGene00020796	WBGene00012130	WBGene00010225
WBGene00022611	WBGene00021691		WBGene00017062	WBGene00017778	WBGene00021326	WBGene00004164
WBGene00013169	WBGene00012468		WBGene00011572	WBGene00020854	WBGene00017703	WBGene00008270
WBGene00023209	WBGene00012588		WBGene00019299	WBGene00019806	WBGene00006436	WBGene00016659
WBGene00013127	WBGene00015428		WBGene00020850	WBGene00018667	WBGene00011404	WBGene00018359
WBGene00007178	WBGene00004146		WBGene00012304	WBGene00010809	WBGene00004198	WBGene00044924
WBGene00000103	WBGene00004434		WBGene00019205	WBGene00019479	WBGene00004127	WBGene00010277
WBGene00012222	WBGene00013844		WBGene00007877	WBGene00022091	WBGene00011446	WBGene00017262
WBGene00015692	WBGene00009585		WBGene00021903	WBGene00022235	WBGene00011891	WBGene00017212
WBGene00022817	WBGene00014031		WBGene00022281	WBGene00019359	WBGene00008273	WBGene00015910
WBGene00022160	WBGene00000862		WBGene00044394	WBGene00002024	WBGene00001182	WBGene00019021
WBGene00003471	WBGene00004017		WBGene00006424	WBGene00014852	WBGene00004038	WBGene00020054
WBGene00044109	WBGene00008139		WBGene00011531	WBGene00000454	WBGene00004949	WBGene00015512
WBGene00019306	WBGene00020999		WBGene00009500	WBGene00194852	WBGene00006570	WBGene00000653
WBGene00011184	WBGene00005599		WBGene00006773	WBGene00016694	WBGene00002915	WBGene00020104
WBGene00000735	WBGene00008497		WBGene00016869	WBGene00044614	WBGene00006066	WBGene00000711
WBGene00018928	WBGene00022382		WBGene00003166	WBGene00019542	WBGene00006366	WBGene00003765
WBGene00009676	WBGene00044410		WBGene00005205	WBGene00018496	WBGene00006774	WBGene00000882
WBGene00019734	WBGene00011369		WBGene00006363	WBGene00000652	WBGene00004237	WBGene00015514
WBGene00021415	WBGene00013356		WBGene00008280	WBGene00013566	WBGene00016447	WBGene00018487
WBGene00010727	WBGene00000097		WBGene00011520	WBGene00016445	WBGene00013704	WBGene00012007
WBGene00011325	WBGene00015851		WBGene00008300	WBGene00013826	WBGene00009825	WBGene00007934
WBGene00007304	WBGene00015472		WBGene00018403	WBGene00012180	WBGene00009008	WBGene00006592
WBGene00002051	WBGene00008405		WBGene00019329	WBGene00011428	WBGene00010705	WBGene00006678
WBGene00007142	WBGene00045388		WBGene00000013	WBGene00010988	WBGene00007261	WBGene00017506
WBGene00007574	WBGene00001935		WBGene00050932	WBGene00016679	WBGene00009561	WBGene00004356
WBGene00009791	WBGene00012241		WBGene00021348	WBGene00003533	WBGene00015752	WBGene00021491
WBGene00000681	WBGene00008681		WBGene00010669	WBGene00044233	WBGene00001239	WBGene00016920
WBGene00044662	WBGene00021599		WBGene00003571	WBGene00006976	WBGene00000512	WBGene00015205
WBGene00012597	WBGene00010882		WBGene00020662	WBGene00023422	WBGene00013358	WBGene00007591
WBGene00007525	WBGene00001937		WBGene00044144	WBGene00008176	WBGene00045348	WBGene00017068
WBGene00003017	WBGene00020799		WBGene00010704	WBGene00012552	WBGene00014184	WBGene00000613
WBGene00010717	WBGene00021238		WBGene00011119	WBGene00004016	WBGene00010908	WBGene00008320
WBGene00021835	WBGene00013961		WBGene00013920	WBGene00014672	WBGene00011624	WBGene00000157
WBGene00019759	WBGene00194993		WBGene00009993	WBGene00022450	WBGene00044508	WBGene00017756
WBGene00000723	WBGene00020926		WBGene00008136	WBGene00000114	WBGene00006351	WBGene00003731
WBGene00012540	WBGene00020596		WBGene00020376	WBGene00021278	WBGene00000007	WBGene00009987
WBGene00022679			WBGene00010592	WBGene00023482	WBGene00001992	WBGene00016522
WBGene00004229			WBGene00003818	WBGene00011479	WBGene00002974	WBGene00022744
WBGene00000039			WBGene00018151	WBGene00004113	WBGene00000136	WBGene00010456
WBGene00000738			WBGene00019465	WBGene00019282	WBGene00018386	WBGene00013292
WBGene00008211			WBGene00017321	WBGene00009890	WBGene00018435	WBGene00010759
WBGene00022125			WBGene00001052	WBGene00044805	WBGene00009732	WBGene00004397
WBGene00022766			WBGene00011866	WBGene00013781	WBGene00001620	WBGene00001694
WBGene00008655			WBGene00022734	WBGene00011858	WBGene00014669	WBGene00000979
WBGene00015794			WBGene00000018	WBGene00018715	WBGene00002827	WBGene00016136
WBGene00016683			WBGene00000186	WBGene00009425	WBGene00000902	WBGene00000696
WBGene00011420			WBGene00003417	WBGene00021283	WBGene00002055	WBGene00001070
WBGene00008557			WBGene00009727	WBGene00001082	WBGene00044637	WBGene00016749
WBGene00019819			WBGene00016928	WBGene00003534	WBGene00008123	WBGene00010727
WBGene00000557			WBGene00005556	WBGene00015303	WBGene00013379	WBGene00044043
WBGene00001703			WBGene00017012	WBGene00015664	WBGene00003754	WBGene00000511
WBGene00019781			WBGene00010947	WBGene00017292	WBGene00021156	WBGene00015169
WBGene00001631			WBGene00020813	WBGene00001878	WBGene00018418	WBGene00015483
WBGene00022665			WBGene00003232	WBGene00009679	WBGene00007605	WBGene00003031
WBGene00000282			WBGene00008731	WBGene00023323	WBGene00003630	WBGene00006410
WBGene00000704			WBGene00010251	WBGene00013531	WBGene00011418	WBGene00016506
WBGene00000691			WBGene00005691	WBGene00009218	WBGene00020280	WBGene00003727
WBGene00012538			WBGene00023492	WBGene00016493	WBGene00007823	WBGene00017446
WBGene00000083			WBGene00015087	WBGene00044316	WBGene00004296	WBGene00000669
WBGene00000751			WBGene00044367	WBGene00045049	WBGene00015777	WBGene00021745
WBGene00012439			WBGene00004207	WBGene00001556	WBGene00001637	WBGene00021529
WBGene00000523			WBGene00003842	WBGene00044439	WBGene00012778	WBGene00007130
WBGene00023501			WBGene00000584	WBGene00011550	WBGene00019979	WBGene00000702
WBGene00017340			WBGene00021195	WBGene00022500	WBGene00012445	WBGene00021195
WBGene00018515			WBGene00011224	WBGene00005049	WBGene00044989	WBGene00009944
WBGene00016133			WBGene00017013	WBGene00021085	WBGene00008560	WBGene00003616
WBGene00021343			WBGene00008885	WBGene00022330	WBGene00010317	WBGene00000631
WBGene00077489			WBGene00005640	WBGene00008602	WBGene00003549	WBGene00044697
WBGene00022591			WBGene00012723	WBGene00009572	WBGene00019763	WBGene00013266
WBGene00006956			WBGene00015920	WBGene00015136	WBGene00007141	WBGene00004311
WBGene00014206			WBGene00021547	WBGene00014871	WBGene00000040	WBGene00003763
WBGene00009926			WBGene00010558	WBGene00195071	WBGene00019298	WBGene00010667
WBGene00003643			WBGene00015682	WBGene00003660	WBGene00008369	WBGene00020335
WBGene00015355			WBGene00004746	WBGene00013829	WBGene00008296	WBGene00011517
WBGene00020143			WBGene00010075	WBGene00016573	WBGene00011803	WBGene00003112
WBGene00011042			WBGene00010222	WBGene00015061	WBGene00017959	WBGene00000659
WBGene00022155			WBGene00044615	WBGene00194951	WBGene00000289	WBGene00015460
WBGene00017936			WBGene00012025	WBGene00001909	WBGene00008999	WBGene00019504
WBGene00011398			WBGene00010322	WBGene00009374	WBGene00012032	WBGene00011263
WBGene00020651			WBGene00007430	WBGene00011116	WBGene00012941	WBGene00001067
WBGene00020339			WBGene00006518	WBGene00013839	WBGene00015008	WBGene00015645
WBGene00019300			WBGene00010985	WBGene00017889	WBGene00022073	WBGene00009370
WBGene00013895			WBGene00016907	WBGene00011115	WBGene00004257	WBGene00001449
WBGene00015510			WBGene00008094	WBGene00006672	WBGene00011167	WBGene00000616
WBGene00003517			WBGene00012019	WBGene00013779	WBGene00015157	WBGene00001071
WBGene00000746			WBGene00005260	WBGene00008701	WBGene00010867	WBGene00019674
WBGene00009081			WBGene00020911	WBGene00009544	WBGene00011681	WBGene00001631
WBGene00010760			WBGene00019781	WBGene00003751	WBGene00010681	WBGene00011642
WBGene00019154			WBGene00008085	WBGene00018989	WBGene00010893	WBGene00016914
WBGene00002632			WBGene00011222	WBGene00019575	WBGene00020649	WBGene00003768
WBGene00015476			WBGene00020249	WBGene00020092	WBGene00006950	WBGene00000968
			WBGene00001115	WBGene00020066	WBGene00020609	WBGene00010001
			WBGene00006974	WBGene00004213	WBGene00011522	WBGene00044901
			WBGene00007752	WBGene00022438	WBGene00006439	WBGene00003378
			WBGene00007072	WBGene00011740	WBGene00000959	WBGene00013173
			WBGene00015214	WBGene00019326	WBGene00010957	WBGene00001065
			WBGene00009434	WBGene00001572	WBGene00017349	WBGene00004897
			WBGene00011755	WBGene00017006	WBGene00004369	WBGene00001699
			WBGene00020657	WBGene00023084	WBGene00012346	WBGene00004468
			WBGene00000966	WBGene00045111	WBGene00006954	WBGene00021844
			WBGene00003876	WBGene00014845	WBGene00004929	WBGene00017563
			WBGene00003802	WBGene00044410	WBGene00020576	WBGene00003511
			WBGene00022141	WBGene00020026	WBGene00018181	WBGene00003887
			WBGene00011372	WBGene00012591	WBGene00002044	WBGene00009797
			WBGene00007329	WBGene00017413	WBGene00016423	WBGene00018411
			WBGene00000009	WBGene00004436	WBGene00020908	WBGene00008408
			WBGene00011964	WBGene00021875	WBGene00020139	WBGene00016629
			WBGene00022336	WBGene00044737	WBGene00006370	WBGene00000641
			WBGene00011950	WBGene00004987	WBGene00008781	WBGene00010222
			WBGene00017546	WBGene00011546	WBGene00004258	WBGene00010110
			WBGene00022418	WBGene00044285	WBGene00020554	WBGene00003402
			WBGene00003408	WBGene00000804	WBGene00019060	WBGene00016283
			WBGene00015395	WBGene00017817	WBGene00006324	WBGene00000709
			WBGene00044363	WBGene00017838	WBGene00044792	WBGene00008963
			WBGene00016170	WBGene00013406	WBGene00004234	WBGene00000660
			WBGene00022805	WBGene00013701	WBGene00013037	WBGene00009468
			WBGene00006490	WBGene00016978	WBGene00003731	WBGene00017567
			WBGene00012536	WBGene00004274	WBGene00006671	WBGene00001608
			WBGene00011198	WBGene00002100	WBGene00021389	WBGene00021547
			WBGene00004025	WBGene00044549	WBGene00010456	WBGene00016150
			WBGene00010077	WBGene00009514	WBGene00000214	WBGene00013633
			WBGene00011065	WBGene00003380	WBGene00013292	WBGene00019663
			WBGene00001717	WBGene00195150	WBGene00010759	WBGene00009243
			WBGene00005487	WBGene00018154	WBGene00009373	WBGene00000990
			WBGene00019906	WBGene00045212	WBGene00016067	WBGene00003766
			WBGene00009119	WBGene00004143	WBGene00003878	WBGene00014108
			WBGene00044467	WBGene00000874	WBGene00006633	WBGene00008435
			WBGene00013785	WBGene00014039	WBGene00003530	WBGene00009712
			WBGene00006829	WBGene00016061	WBGene00013848	WBGene00016490
			WBGene00011692	WBGene00014069	WBGene00016152	WBGene00010539
			WBGene00018717	WBGene00014848	WBGene00020051	WBGene00007996
			WBGene00001681	WBGene00001451	WBGene00020824	WBGene00020947
			WBGene00006646	WBGene00022472	WBGene00002271	WBGene00020268
			WBGene00021897	WBGene00013289	WBGene00011330	WBGene00000255
			WBGene00011106	WBGene00017979	WBGene00008652	WBGene00013293
			WBGene00008694	WBGene00001455	WBGene00045416	WBGene00002258
			WBGene00006982	WBGene00009052	WBGene00004228	WBGene00009813
			WBGene00017136	WBGene00006371	WBGene00000395	WBGene00015791
			WBGene00003520	WBGene00022571	WBGene00020592	WBGene00009187
			WBGene00009551	WBGene00013388	WBGene00004120	WBGene00017385
			WBGene00008307	WBGene00018311	WBGene00021529	WBGene00050875
			WBGene00013585	WBGene00010573	WBGene00007130	WBGene00016011
			WBGene00012669	WBGene00001434	WBGene00022260	WBGene00001976
			WBGene00019444	WBGene00019962	WBGene00013311	WBGene00044396
			WBGene00015288	WBGene00010586	WBGene00045275	WBGene00000630
			WBGene00013921	WBGene00006779	WBGene00003962	WBGene00007925
			WBGene00003367	WBGene00001887	WBGene00014173	WBGene00003497
			WBGene00001526	WBGene00016106	WBGene00020610	WBGene00003019
			WBGene00000161	WBGene00013681	WBGene00010137	WBGene00020083
			WBGene00007885	WBGene00017964	WBGene00017082	WBGene00022611
			WBGene00044311	WBGene00019295	WBGene00013130	WBGene00013169
			WBGene00017991	WBGene00020869	WBGene00003234	WBGene00007695
			WBGene00022515	WBGene00020985	WBGene00022518	WBGene00022392
			WBGene00022825	WBGene00018758	WBGene00003764	WBGene00023209
			WBGene00016558	WBGene00020108	WBGene00019168	WBGene00013127
			WBGene00018518	WBGene00012798	WBGene00007016	WBGene00022613
			WBGene00018723	WBGene00044733	WBGene00017437	WBGene00001031
			WBGene00006597	WBGene00019760	WBGene00015984	WBGene00020026
			WBGene00003106	WBGene00017535	WBGene00017430	WBGene00007178
			WBGene00010631	WBGene00009644	WBGene00019895	WBGene00000254
			WBGene00018111	WBGene00016142	WBGene00010454	WBGene00044035
			WBGene00007782	WBGene00007699	WBGene00000493	WBGene00000412
			WBGene00001980	WBGene00003385	WBGene00004197	WBGene00003959
			WBGene00014300	WBGene00016918	WBGene00011076	WBGene00021976
			WBGene00020831	WBGene00019328	WBGene00007284	WBGene00006844
			WBGene00016390	WBGene00011109	WBGene00022788	WBGene00003953
			WBGene00010499	WBGene00023267	WBGene00022122	WBGene00000103
			WBGene00008992	WBGene00001464	WBGene00020553	WBGene00012222
			WBGene00000058	WBGene00018806	WBGene00012184	WBGene00000963
			WBGene00045331	WBGene00021022	WBGene00004060	WBGene00015692
			WBGene00005739	WBGene00022204	WBGene00021952	WBGene00022817
			WBGene00004878	WBGene00012236	WBGene00012529	WBGene00045253
			WBGene00009326	WBGene00017428	WBGene00013592	WBGene00019717
			WBGene00007467	WBGene00016028	WBGene00008629	WBGene00044109
			WBGene00016605	WBGene00017099	WBGene00021159	WBGene00000929
			WBGene00004348	WBGene00016073	WBGene00009108	WBGene00011184
			WBGene00004745	WBGene00050977	WBGene00004000	WBGene00007894
			WBGene00001676	WBGene00021739	WBGene00011381	WBGene00017745
			WBGene00022200	WBGene00001590	WBGene00010123	WBGene00000681
			WBGene00004014	WBGene00011683	WBGene00000995	WBGene00014245
			WBGene00020368	WBGene00013100	WBGene00003636	WBGene00008729
			WBGene00007825	WBGene00010818	WBGene00015336	WBGene00000735
			WBGene00044146	WBGene00009264	WBGene00018040	WBGene00004858
			WBGene00012134	WBGene00006584	WBGene00016629	WBGene00018419
			WBGene00018878	WBGene00017543	WBGene00004302	WBGene00022766
			WBGene00011454	WBGene00016891	WBGene00003729	WBGene00044922
			WBGene00017639	WBGene00016977	WBGene00004925	WBGene00003923
			WBGene00020478	WBGene00015418	WBGene00005133	WBGene00018928
			WBGene00003173	WBGene00015970	WBGene00003402	WBGene00045024
			WBGene00014294	WBGene00020446	WBGene00008963	WBGene00008548
			WBGene00012854	WBGene00003755	WBGene00020561	WBGene00017934
			WBGene00020050	WBGene00001516	WBGene00016979	WBGene00007331
			WBGene00009810	WBGene00017658	WBGene00017892	WBGene00009676
			WBGene00001949	WBGene00019335	WBGene00006911	WBGene00010714
			WBGene00006895	WBGene00022305	WBGene00004501	WBGene00016394
			WBGene00014673	WBGene00022554	WBGene00015623	WBGene00008132
			WBGene00003475	WBGene00018159	WBGene00011718	WBGene00001078
			WBGene00003787	WBGene00009734	WBGene00011530	WBGene00019227
			WBGene00018333	WBGene00018172	WBGene00000900	WBGene00019734
			WBGene00017164	WBGene00003186	WBGene00015767	WBGene00021415
			WBGene00014258	WBGene00019431	WBGene00016716	WBGene00010468
			WBGene00021938	WBGene00016247	WBGene00004256	WBGene00017783
			WBGene00022087	WBGene00015502	WBGene00001591	WBGene00004979
			WBGene00008999	WBGene00018551	WBGene00010275	WBGene00000843
			WBGene00021430	WBGene00017074	WBGene00011488	WBGene00011325
			WBGene00021817	WBGene00000441	WBGene00008435	WBGene00002051
			WBGene00006768	WBGene00022093	WBGene00009450	WBGene00007142
			WBGene00007116	WBGene00019718	WBGene00012428	WBGene00003952
			WBGene00020398	WBGene00011218	WBGene00011487	WBGene00007407
			WBGene00009829	WBGene00014196	WBGene00007562	WBGene00011624
			WBGene00021367	WBGene00012997	WBGene00010881	WBGene00007574
			WBGene00008775	WBGene00021909	WBGene00018560	WBGene00011059
			WBGene00019813	WBGene00020297	WBGene00008150	WBGene00017891
			WBGene00006432	WBGene00018094	WBGene00017962	WBGene00019306
			WBGene00018413	WBGene00044690	WBGene00003965	WBGene00018473
			WBGene00009010	WBGene00016509	WBGene00018789	WBGene00007525
			WBGene00006459	WBGene00019092	WBGene00018823	WBGene00003017
			WBGene00004756	WBGene00020912	WBGene00008033	WBGene00002200
			WBGene00021049	WBGene00012617	WBGene00009677	WBGene00018241
			WBGene00001695	WBGene00004336	WBGene00000219	WBGene00019939
			WBGene00001744	WBGene00013163	WBGene00004020	WBGene00018996
			WBGene00004033	WBGene00021799	WBGene00001644	WBGene00010717
			WBGene00003655	WBGene00045502	WBGene00019273	WBGene00011291
			WBGene00018393	WBGene00020064	WBGene00013877	WBGene00006535
			WBGene00006680	WBGene00012297	WBGene00001502	WBGene00015896
			WBGene00004032	WBGene00017440	WBGene00008411	WBGene00021835
			WBGene00000831	WBGene00007065	WBGene00007949	WBGene00019759
			WBGene00001701	WBGene00007387	WBGene00003967	WBGene00000723
			WBGene00016628	WBGene00011732	WBGene00006607	WBGene00011529
			WBGene00016064	WBGene00010865	WBGene00013855	WBGene00012540
			WBGene00013729	WBGene00022144	WBGene00003569	WBGene00022679
			WBGene00045435	WBGene00009730	WBGene00017448	WBGene00004229
			WBGene00004281	WBGene00018069	WBGene00016422	WBGene00011445
			WBGene00044162	WBGene00015014	WBGene00003497	WBGene00016996
			WBGene00015480	WBGene00022213	WBGene00013575	WBGene00000039
			WBGene00003239	WBGene00004951	WBGene00016428	WBGene00019572
			WBGene00019643	WBGene00015159	WBGene00021709	WBGene00000738
			WBGene00006109	WBGene00077550	WBGene00012530	WBGene00013708
			WBGene00000952	WBGene00010290	WBGene00017565	WBGene00009809
			WBGene00044508	WBGene00010294	WBGene00000086	WBGene00008211
			WBGene00021401	WBGene00008415	WBGene00000218	WBGene00022125
			WBGene00022042	WBGene00020677	WBGene00009891	WBGene00008690
			WBGene00018569	WBGene00003825	WBGene00009978	WBGene00008655
			WBGene00007096	WBGene00012812	WBGene00012280	WBGene00010397
			WBGene00016643	WBGene00000534	WBGene00003612	WBGene00003695
			WBGene00015538	WBGene00077528	WBGene00015866	WBGene00015794
			WBGene00002988	WBGene00010665	WBGene00017151	WBGene00016683
			WBGene00009036	WBGene00018522	WBGene00010749	WBGene00021915
			WBGene00000064	WBGene00017572	WBGene00016095	WBGene00011420
			WBGene00000472	WBGene00004283	WBGene00000254	WBGene00008557
			WBGene00011762	WBGene00044134	WBGene00012202	WBGene00000982
			WBGene00000567	WBGene00001601	WBGene00003423	WBGene00019819
			WBGene00016258	WBGene00021185	WBGene00015935	WBGene00000557
			WBGene00015649	WBGene00013077	WBGene00007926	WBGene00021300
			WBGene00001134	WBGene00000692	WBGene00016586	WBGene00012434
			WBGene00010134	WBGene00000771	WBGene00009059	WBGene00001703
			WBGene00010360	WBGene00015943	WBGene00002083	WBGene00020557
			WBGene00001635	WBGene00044752	WBGene00020022	WBGene00021690
			WBGene00016974	WBGene00017087	WBGene00007875	WBGene00012945
			WBGene00007845	WBGene00016162	WBGene00001616	WBGene00022044
			WBGene00009745	WBGene00011369	WBGene00017350	WBGene00019781
			WBGene00010727	WBGene00013748	WBGene00017751	WBGene00001020
			WBGene00003531	WBGene00010178	WBGene00019717	WBGene00017336
			WBGene00044295	WBGene00017835	WBGene00006936	WBGene00022665
			WBGene00012938	WBGene00004930	WBGene00003053	WBGene00011439
			WBGene00000086	WBGene00001885	WBGene00015203	WBGene00015805
			WBGene00011756	WBGene00021294	WBGene00020383	WBGene00000282
			WBGene00015377	WBGene00012290	WBGene00017761	WBGene00000704
			WBGene00019841	WBGene00015258	WBGene00007531	WBGene00010274
			WBGene00011015	WBGene00015973	WBGene00010284	WBGene00001251
			WBGene00020319	WBGene00002189	WBGene00012317	WBGene00000691
			WBGene00003407	WBGene00044990	WBGene00011755	WBGene00003717
			WBGene00012047	WBGene00009554	WBGene00017745	WBGene00012538
			WBGene00003647	WBGene00005626	WBGene00018771	WBGene00010745
			WBGene00011661	WBGene00016354	WBGene00020322	WBGene00000083
			WBGene00005240	WBGene00010260	WBGene00022766	WBGene00012439
			WBGene00014698	WBGene00011288	WBGene00020865	WBGene00008586
			WBGene00007651	WBGene00019068	WBGene00003519	WBGene00000115
			WBGene00044617	WBGene00002978	WBGene00008669	WBGene00015332
			WBGene00022579	WBGene00022190	WBGene00002030	WBGene00010115
			WBGene00044006	WBGene00020471	WBGene00015196	WBGene00009408
			WBGene00014137	WBGene00013647	WBGene00004921	WBGene00017850
			WBGene00016367	WBGene00021240	WBGene00008548	WBGene00021492
			WBGene00005096	WBGene00006780	WBGene00008521	WBGene00007983
			WBGene00000872	WBGene00009948	WBGene00010714	WBGene00002005
			WBGene00019380	WBGene00011432	WBGene00008354	WBGene00015660
			WBGene00011884	WBGene00015780	WBGene00008132	WBGene00023501
			WBGene00013073	WBGene00017279	WBGene00004224	WBGene00017340
			WBGene00012554	WBGene00012483	WBGene00015057	WBGene00018515
			WBGene00044696	WBGene00016302	WBGene00003006	WBGene00021343
			WBGene00020811	WBGene00001401	WBGene00007904	WBGene00016264
			WBGene00019317	WBGene00018405	WBGene00001565	WBGene00045399
			WBGene00004901	WBGene00010878	WBGene00016044	WBGene00022782
			WBGene00017480	WBGene00006551	WBGene00018779	WBGene00016059
			WBGene00008511	WBGene00044799	WBGene00007071	WBGene00016499
			WBGene00022592	WBGene00005202	WBGene00008199	WBGene00009636
			WBGene00011803	WBGene00016489	WBGene00001068	WBGene00015527
			WBGene00019113	WBGene00015098	WBGene00019234	WBGene00022591
			WBGene00013852	WBGene00008405	WBGene00003877	WBGene00006956
			WBGene00007808	WBGene00015811	WBGene00010468	WBGene00014206
			WBGene00008119	WBGene00018231	WBGene00017125	WBGene00021742
			WBGene00003808	WBGene00016964	WBGene00020107	WBGene00009926
			WBGene00000406	WBGene00008010	WBGene00019105	WBGene00006534
			WBGene00009784	WBGene00020866	WBGene00007474	WBGene00043097
			WBGene00000116	WBGene00013855	WBGene00001099	WBGene00003643
			WBGene00020110	WBGene00020618	WBGene00004124	WBGene00012035
			WBGene00004216	WBGene00001437	WBGene00018152	WBGene00002256
			WBGene00016454	WBGene00004194	WBGene00015172	WBGene00015355
			WBGene00003409	WBGene00019926	WBGene00009237	WBGene00020143
			WBGene00021493	WBGene00012167	WBGene00003055	WBGene00011430
			WBGene00010524	WBGene00009188	WBGene00011307	WBGene00011042
			WBGene00007799	WBGene00002033	WBGene00015709	WBGene00022155
			WBGene00013317	WBGene00021506	WBGene00020788	WBGene00017936
			WBGene00006439	WBGene00007007	WBGene00007104	WBGene00044796
			WBGene00004189	WBGene00016387	WBGene00010258	WBGene00007344
			WBGene00019908	WBGene00022078	WBGene00002181	WBGene00010772
			WBGene00016858	WBGene00004825	WBGene00001519	WBGene00009360
			WBGene00008341	WBGene00001225	WBGene00020114	WBGene00011773
			WBGene00000591	WBGene00003080	WBGene00011059	WBGene00011398
			WBGene00077771	WBGene00016575	WBGene00006308	WBGene00010988
			WBGene00011238	WBGene00044987	WBGene00017840	WBGene00022259
			WBGene00004749	WBGene00014888	WBGene00019127	WBGene00015753
			WBGene00017121	WBGene00013261	WBGene00009110	WBGene00010471
			WBGene00022252	WBGene00018054	WBGene00003247	WBGene00020651
			WBGene00012497	WBGene00017356	WBGene00003091	WBGene00016190
			WBGene00002028	WBGene00023276	WBGene00007799	WBGene00000373
			WBGene00020577	WBGene00194926	WBGene00011473	WBGene00013197
			WBGene00003706	WBGene00003716	WBGene00004222	WBGene00020339
			WBGene00021335	WBGene00011756	WBGene00002200	WBGene00019300
			WBGene00003725	WBGene00012885	WBGene00018984	WBGene00013895
			WBGene00004316	WBGene00021667	WBGene00006749	WBGene00004822
			WBGene00015548	WBGene00007219	WBGene00004061	WBGene00015510
			WBGene00014023	WBGene00001683	WBGene00007424	WBGene00003517
			WBGene00016841	WBGene00007218	WBGene00021190	WBGene00000746
			WBGene00018344	WBGene00006385	WBGene00018969	WBGene00003859
			WBGene00020107	WBGene00021691	WBGene00019148	WBGene00010760
			WBGene00013900	WBGene00014795	WBGene00016757	WBGene00019154
			WBGene00001643	WBGene00019650	WBGene00000845	WBGene00004210
			WBGene00022776	WBGene00019831	WBGene00001038	WBGene00015894
			WBGene00006776	WBGene00016097	WBGene00044696	WBGene00008370
			WBGene00007286	WBGene00016144	WBGene00009965	WBGene00015476
			WBGene00020004	WBGene00017120	WBGene00018316
			WBGene00020855	WBGene00003790	WBGene00001244
			WBGene00044028	WBGene00003844	WBGene00015865
			WBGene00010220	WBGene00014956	WBGene00000781
			WBGene00011725	WBGene00011754	WBGene00020160
			WBGene00015041	WBGene00011111	WBGene00017691
			WBGene00020104	WBGene00023209	WBGene00000246
			WBGene00006658	WBGene00017738	WBGene00008986
			WBGene00013037	WBGene00012037	WBGene00000981
			WBGene00007340	WBGene00021968	WBGene00020501
			WBGene00019620	WBGene00001824	WBGene00013668
			WBGene00020418	WBGene00001605	WBGene00018281
			WBGene00011897	WBGene00044204	WBGene00020938
			WBGene00003990	WBGene00001132	WBGene00018237
			WBGene00017536	WBGene00012989	WBGene00003531
			WBGene00018974	WBGene00000875	WBGene00007994
			WBGene00023414	WBGene00018795	WBGene00010369
			WBGene00000226	WBGene00043982	WBGene00005025
			WBGene00009211	WBGene00007202	WBGene00001089
			WBGene00016089	WBGene00002266	WBGene00016419
			WBGene00003068	WBGene00014987	WBGene00004719
			WBGene00008132	WBGene00044666	WBGene00015334
			WBGene00022104	WBGene00015056	WBGene00006779
			WBGene00000840	WBGene00021247	WBGene00003726
			WBGene00007607	WBGene00020270	WBGene00003911
			WBGene00007050	WBGene00008916	WBGene00022743
			WBGene00008237	WBGene00023354	WBGene00003093
			WBGene00007118	WBGene00012901	WBGene00000541
			WBGene00009888	WBGene00011041	WBGene00009094
			WBGene00016396	WBGene00007564	WBGene00007984
			WBGene00010497	WBGene00016930	WBGene00004755
			WBGene00010538	WBGene00020338	WBGene00015449
			WBGene00018326	WBGene00017584	WBGene00013847
			WBGene00021163	WBGene00004429	WBGene00001251
			WBGene00015522	WBGene00000499	WBGene00008993
			WBGene00008744	WBGene00016738	WBGene00001851
			WBGene00003969	WBGene00000612	WBGene00020219
			WBGene00020784	WBGene00006374	WBGene00022856
			WBGene00004119	WBGene00018964	WBGene00006757
			WBGene00000750	WBGene00077543	WBGene00015434
			WBGene00004429	WBGene00010067	WBGene00008167
			WBGene00000231	WBGene00021314	WBGene00009904
			WBGene00012529	WBGene00013615	WBGene00000259
			WBGene00044504	WBGene00019264	WBGene00002123
			WBGene00009483	WBGene00015558	WBGene00017093
			WBGene00020443	WBGene00008559	WBGene00009958
			WBGene00006691	WBGene00021832	WBGene00003572
			WBGene00017939	WBGene00019219	WBGene00019379
			WBGene00022757	WBGene00021211	WBGene00019521
			WBGene00006772	WBGene00018481	WBGene00007112
			WBGene00012009	WBGene00022309	WBGene00001029
			WBGene00018739	WBGene00004491	WBGene00012186
			WBGene00010013	WBGene00023205	WBGene00019986
			WBGene00013366	WBGene00021410	WBGene00002007
			WBGene00000481	WBGene00044312	WBGene00016004
			WBGene00015524	WBGene00001931	WBGene00004148
			WBGene00003623	WBGene00009820	WBGene00009334
			WBGene00019935	WBGene00022456	WBGene00007228
			WBGene00002176	WBGene00017071	WBGene00012531
			WBGene00013487	WBGene00018776	WBGene00016059
			WBGene00004884	WBGene00016893	WBGene00011888
			WBGene00002151	WBGene00022454	WBGene00022861
			WBGene00020444	WBGene00001412	WBGene00013238
			WBGene00021585	WBGene00015007	WBGene00010605
			WBGene00000963	WBGene00007932	WBGene00015527
			WBGene00021503	WBGene00022910	WBGene00011775
			WBGene00016333	WBGene00002059	WBGene00003619
			WBGene00020670	WBGene00004023	WBGene00016013
			WBGene00018939	WBGene00008681	WBGene00000055
			WBGene00006062	WBGene00000536	WBGene00015814
			WBGene00005006	WBGene00017492	WBGene00005023
			WBGene00003172	WBGene00007731	WBGene00008198
			WBGene00004186	WBGene00008172	WBGene00011006
			WBGene00016475	WBGene00022283	WBGene00017569
			WBGene00004147	WBGene00010721	WBGene00012545
			WBGene00011831	WBGene00006375	WBGene00015478
			WBGene00195085	WBGene00020453	WBGene00010350
			WBGene00000068	WBGene00004363	WBGene00010988
			WBGene00006626	WBGene00004030	WBGene00008277
			WBGene00011928	WBGene00007623	WBGene00007388
			WBGene00011719	WBGene00015293	WBGene00017925
			WBGene00008077	WBGene00044730	WBGene00019816
			WBGene00020920	WBGene00019625	WBGene00000003
			WBGene00011212	WBGene00012148	WBGene00008018
			WBGene00001479	WBGene00021245	WBGene00003627
			WBGene00007321	WBGene00007020	WBGene00018543
			WBGene00012646	WBGene00017916	WBGene00008656
			WBGene00015237	WBGene00013121	WBGene00010356
			WBGene00020125	WBGene00013126	WBGene00013197
			WBGene00013204	WBGene00004236	WBGene00007214
			WBGene00003132	WBGene00021795	WBGene00008644
			WBGene00001760	WBGene00018932	WBGene00018424
			WBGene00019023	WBGene00019658	WBGene00015913
			WBGene00020581	WBGene00010622	WBGene00022626
			WBGene00003622	WBGene00001974	WBGene00006373
			WBGene00020446	WBGene00001466	WBGene00019346
			WBGene00020414	WBGene00018511	WBGene00019481
			WBGene00015752	WBGene00010099	WBGene00015544
			WBGene00017416	WBGene00022214	WBGene00004210
			WBGene00045409	WBGene00016250	WBGene00000833
			WBGene00010796	WBGene00045144	WBGene00021540
			WBGene00008570	WBGene00011385	WBGene00009119
			WBGene00016352	WBGene00013365	WBGene00006310
			WBGene00022919	WBGene00018809
			WBGene00001691	WBGene00012806
			WBGene00020584	WBGene00015517
			WBGene00019270	WBGene00044726
			WBGene00015753	WBGene00021847
			WBGene00017800	WBGene00019381
			WBGene00011679	WBGene00020995
			WBGene00000229	WBGene00004412
			WBGene00008333	WBGene00008852
			WBGene00008930	WBGene00000623
			WBGene00020095	WBGene00022695
			WBGene00017464	WBGene00022051
			WBGene00017969	WBGene00044645
			WBGene00008141	WBGene00013308
			WBGene00006393	WBGene00007899
			WBGene00006173	WBGene00015239
			WBGene00010204	WBGene00004046
			WBGene00006910	WBGene00004449
			WBGene00006536	WBGene00007730
			WBGene00011029	WBGene00022448
			WBGene00006783	WBGene00009635
			WBGene00016380	WBGene00006245
			WBGene00022782	WBGene00015130
			WBGene00017100	WBGene00011892
			WBGene00011306	WBGene00020898
			WBGene00007397	WBGene00006586
			WBGene00013025	WBGene00000200
			WBGene00017512	WBGene00008604
			WBGene00010502	WBGene00044462
			WBGene00044580	WBGene00008863
			WBGene00016060	WBGene00077558
			WBGene00007339	WBGene00017801
			WBGene00009840	WBGene00010825
			WBGene00011717	WBGene00019544
			WBGene00006826	WBGene00013756
			WBGene00012324	WBGene00022102
			WBGene00001194	WBGene00001893
			WBGene00014161	WBGene00016666
			WBGene00005973	WBGene00007769
			WBGene00010179	WBGene00009789
			WBGene00195063	WBGene00022180
			WBGene00014184	WBGene00012734
			WBGene00017847	WBGene00002228
			WBGene00020728	WBGene00010195
			WBGene00003730	WBGene00044570
			WBGene00017282	WBGene00009319
			WBGene00003982	WBGene00003812
			WBGene00003566	WBGene00017933
			WBGene00016368	WBGene00023172
			WBGene00015400	WBGene00012701
			WBGene00022852	WBGene00000521
			WBGene00017683	WBGene00018192
			WBGene00009581	WBGene00012004
			WBGene00004510	WBGene00008452
			WBGene00044354	WBGene00021287
			WBGene00020191	WBGene00018513
			WBGene00021012	WBGene00021936
			WBGene00010192	WBGene00014946
			WBGene00000045	WBGene00018668
			WBGene00018018	WBGene00018221
			WBGene00009582	WBGene00012980
			WBGene00016644	WBGene00018394
			WBGene00043059	WBGene00002001
			WBGene00006614	WBGene00012592
			WBGene00001638	WBGene00010833
			WBGene00020503	WBGene00022426
			WBGene00007483	WBGene00016021
			WBGene00021941	WBGene00044493
			WBGene00007358	WBGene00000158
			WBGene00012803	WBGene00013348
			WBGene00022769	WBGene00011789
			WBGene00003862	WBGene00015229
			WBGene00009276	WBGene00003514
			WBGene00015107	WBGene00021939
			WBGene00022458	WBGene00005481
			WBGene00001628	WBGene00021192
			WBGene00000283	WBGene00009470
			WBGene00003412	WBGene00020341
			WBGene00016134	WBGene00016791
			WBGene00007352	WBGene00017247
			WBGene00006213	WBGene00010330
			WBGene00008463	WBGene00013019
			WBGene00012948	WBGene00021296
			WBGene00006682	WBGene00009729
			WBGene00003779	WBGene00022400
			WBGene00004346	WBGene00019944
			WBGene00017314	WBGene00018485
			WBGene00007452	WBGene00017272
			WBGene00000065	WBGene00012559
			WBGene00044287	WBGene00006781
			WBGene00077764	WBGene00010931
			WBGene00017778	WBGene00021943
			WBGene00011639	WBGene00013040
			WBGene00021883	WBGene00009705
			WBGene00022904	WBGene00016016
			WBGene00013632	WBGene00012244
			WBGene00015425	WBGene00017344
			WBGene00021548	WBGene00001536
			WBGene00008441	WBGene00014215
			WBGene00011165	WBGene00012663
			WBGene00003002	WBGene00011847
			WBGene00006605	WBGene00006604
			WBGene00012830	WBGene00021924
			WBGene00010566	WBGene00044728
			WBGene00003641	WBGene00007856
			WBGene00007260	WBGene00009967
			WBGene00010873	WBGene00013509
			WBGene00020185	WBGene00009687
			WBGene00017355	WBGene00009584
			WBGene00007398	WBGene00045321
			WBGene00008830	WBGene00009953
			WBGene00001637	WBGene00016461
			WBGene00002262	WBGene00012872
			WBGene00019311	WBGene00007036
			WBGene00000149	WBGene00017296
			WBGene00017961	WBGene00004882
			WBGene00007635	WBGene00004914
			WBGene00020582	WBGene00017259
			WBGene00020791	WBGene00045511
			WBGene00010338	WBGene00022237
			WBGene00002694	WBGene00077453
			WBGene00006831	WBGene00018652
			WBGene00020583	WBGene00019903
			WBGene00018363	WBGene00004136
			WBGene00016590	WBGene00006067
			WBGene00016238	WBGene00019976
			WBGene00017241	WBGene00010537
			WBGene00016742	WBGene00022781
			WBGene00021249	WBGene00018409
			WBGene00011687	WBGene00022310
			WBGene00008750	WBGene00013727
			WBGene00003583	WBGene00011103
			WBGene00011366	WBGene00016262
			WBGene00014008	WBGene00006495
			WBGene00009082	WBGene00013453
			WBGene00022813	WBGene00019235
			WBGene00017704	WBGene00015359
			WBGene00015555	WBGene00003495
			WBGene00001178	WBGene00015433
			WBGene00020776	WBGene00001049
			WBGene00016503	WBGene00020234
			WBGene00003596	WBGene00016767
			WBGene00017301	WBGene00016741
			WBGene00019849	WBGene00018658
			WBGene00017463	WBGene00016988
			WBGene00045218	WBGene00045063
			WBGene00016248	WBGene00013344
			WBGene00004921	WBGene00001906
			WBGene00007067	WBGene00044788
			WBGene00011283	WBGene00015564
			WBGene00000813	WBGene00001365
			WBGene00045336	WBGene00019304
			WBGene00019156	WBGene00004906
			WBGene00013712	WBGene00008507
			WBGene00044107	WBGene00013255
			WBGene00008520	WBGene00011060
			WBGene00016517	WBGene00000893
			WBGene00008017	WBGene00000287
			WBGene00006309	WBGene00012753
			WBGene00016030	WBGene00018398
			WBGene00008528	WBGene00015464
			WBGene00020919	WBGene00010373
			WBGene00009261	WBGene00022619
			WBGene00000914	WBGene00014996
			WBGene00012461	WBGene00016177
			WBGene00005649	WBGene00010358
			WBGene00013644	WBGene00016099
			WBGene00011604	WBGene00010773
			WBGene00020323	WBGene00022561
			WBGene00016450	WBGene00021821
			WBGene00010963	WBGene00013527
			WBGene00007043	WBGene00044139
			WBGene00016439	WBGene00002131
			WBGene00007951	WBGene00021541
			WBGene00016747	WBGene00023314
			WBGene00008640	WBGene00013000
			WBGene00005090	WBGene00000110
			WBGene00001827	WBGene00015142
			WBGene00045340	WBGene00019324
			WBGene00020609	WBGene00020551
			WBGene00003950	WBGene00012505
			WBGene00010766	WBGene00015457
			WBGene00000206	WBGene00003692
			WBGene00012272	WBGene00007566
			WBGene00000883	WBGene00016842
			WBGene00021840	WBGene00010116
			WBGene00015435	WBGene00010293
			WBGene00006868	WBGene00014158
			WBGene00014077	WBGene00011940
			WBGene00011232	WBGene00003794
			WBGene00010421	WBGene00013357
			WBGene00006407	WBGene00021014
			WBGene00011955	WBGene00007237
			WBGene00016540	WBGene00021681
			WBGene00007417	WBGene00011600
			WBGene00006696	WBGene00018713
			WBGene00003683	WBGene00018071
			WBGene00011742	WBGene00022406
			WBGene00000477	WBGene00008283
			WBGene00018995	WBGene00194892
			WBGene00015956	WBGene00015328
			WBGene00006445	WBGene00009720
			WBGene00022646	WBGene00020475
			WBGene00007702	WBGene00013307
			WBGene00018907	WBGene00018108
			WBGene00000695	WBGene00021205
			WBGene00016226	WBGene00022390
			WBGene00045395	WBGene00006774
			WBGene00007586	WBGene00012931
			WBGene00011328	WBGene00000367
			WBGene00044582	WBGene00018491
			WBGene00015861	WBGene00014778
			WBGene00011354	WBGene00017456
			WBGene00015217	WBGene00019170
			WBGene00015561	WBGene00020904
			WBGene00017578	WBGene00006753
			WBGene00006742	WBGene00000736
			WBGene00006526	WBGene00002121
			WBGene00003953	WBGene00018337
			WBGene00009229	WBGene00050888
			WBGene00004223	WBGene00011813
			WBGene00022702	WBGene00009461
			WBGene00000110	WBGene00002037
			WBGene00015581	WBGene00007058
			WBGene00016020	WBGene00018927
			WBGene00019682	WBGene00001876
			WBGene00010986	WBGene00020012
			WBGene00001340	WBGene00023277
			WBGene00019537	WBGene00016550
			WBGene00004003	WBGene00002264
			WBGene00012285	WBGene00014884
			WBGene00006307	WBGene00008183
			WBGene00000083	WBGene00009929
			WBGene00008645	WBGene00012857
			WBGene00000858	WBGene00044719
			WBGene00007541	WBGene00044351
			WBGene00004925	WBGene00005816
			WBGene00000192	WBGene00008496
			WBGene00013643	WBGene00023246
			WBGene00013091	WBGene00020038
			WBGene00006777	WBGene00019274
			WBGene00004040	WBGene00021100
			WBGene00021353	WBGene00021674
			WBGene00010757	WBGene00004427
			WBGene00022100	WBGene00017643
			WBGene00005127	WBGene00016112
			WBGene00012796	WBGene00014308
			WBGene00002239	WBGene00003165
			WBGene00002979	WBGene00012481
			WBGene00018251	WBGene00021561
			WBGene00020029	WBGene00003424
			WBGene00006364	WBGene00045018
			WBGene00004046	WBGene00003743
			WBGene00017129	WBGene00021073
			WBGene00044206	WBGene00013129
			WBGene00004800	WBGene00022038
			WBGene00014076	WBGene00008865
			WBGene00044705	WBGene00017922
			WBGene00001169	WBGene00023252
			WBGene00015779	WBGene00044894
			WBGene00003791	WBGene00023399
			WBGene00016288	WBGene00018899
			WBGene00020863	WBGene00021037
			WBGene00000005	WBGene00008251
			WBGene00004768	WBGene00008603
			WBGene00005111	WBGene00009192
			WBGene00003826	WBGene00006377
			WBGene00004769	WBGene00014854
			WBGene00003580	WBGene00006706
			WBGene00004777	WBGene00012978
			WBGene00010272	WBGene00017668
			WBGene00022017	WBGene00006684
			WBGene00001506	WBGene00016088
			WBGene00019545	WBGene00019890
			WBGene00000554	WBGene00007708
			WBGene00019731	WBGene00021233
			WBGene00022164	WBGene00007601
			WBGene00015523	WBGene00020795
			WBGene00011995	WBGene00023348
			WBGene00004893	WBGene00004434
			WBGene00015311	WBGene00009126
			WBGene00009263	WBGene00016703
			WBGene00020932	WBGene00001641
			WBGene00017765	WBGene00019535
			WBGene00011362	WBGene00004993
			WBGene00022325	WBGene00019578
			WBGene00017842	WBGene00018660
			WBGene00011775	WBGene00004446
			WBGene00004465	WBGene00021416
			WBGene00020517	WBGene00000026
			WBGene00013060	WBGene00044031
			WBGene00016786	WBGene00018165
			WBGene00013275	WBGene00003085
			WBGene00003676	WBGene00021409
			WBGene00021111	WBGene00006542
			WBGene00011352	WBGene00019964
			WBGene00004059	WBGene00044762
			WBGene00000529	WBGene00044242
			WBGene00022269	WBGene00007744
			WBGene00020464	WBGene00017736
			WBGene00004405	WBGene00013437
			WBGene00018625	WBGene00005945
			WBGene00008547	WBGene00044249
			WBGene00015857	WBGene00006797
			WBGene00010405	WBGene00012183
			WBGene00020689	WBGene00011868
			WBGene00021831	WBGene00009054
			WBGene00000055	WBGene00009778
			WBGene00195075	WBGene00021853
			WBGene00020152	WBGene00007454
			WBGene00003646	WBGene00010183
			WBGene00000084	WBGene00004488
			WBGene00020631	WBGene00077454
			WBGene00000170	WBGene00007893
			WBGene00016119	WBGene00014099
			WBGene00007745	WBGene00010643
			WBGene00006970	WBGene00010796
			WBGene00004974	WBGene00001482
			WBGene00019940	WBGene00010258
			WBGene00003700	WBGene00012554
			WBGene00000114	WBGene00007745
			WBGene00015412	WBGene00016568
			WBGene00011280	WBGene00016995
			WBGene00017770	WBGene00012739
			WBGene00008678	WBGene00003021
			WBGene00011681	WBGene00011213
			WBGene00003926	WBGene00006395
			WBGene00004699	WBGene00007696
			WBGene00014254	WBGene00008403
			WBGene00019541	WBGene00015191
			WBGene00020397	WBGene00004417
			WBGene00019405	WBGene00002007
			WBGene00002045	WBGene00003963
			WBGene00009854	WBGene00000090
			WBGene00001517	WBGene00022191
			WBGene00019102	WBGene00000889
			WBGene00007979	WBGene00020336
			WBGene00010491	WBGene00011828
			WBGene00002229	WBGene00006629
			WBGene00019762	WBGene00011685
			WBGene00011763	WBGene00016153
			WBGene00001653	WBGene00022307
			WBGene00004372	WBGene00019730
			WBGene00011864	WBGene00012565
			WBGene00017988	WBGene00021238
			WBGene00000277	WBGene00002194
			WBGene00008025	WBGene00006728
			WBGene00014166	WBGene00018234
			WBGene00019187	WBGene00021104
			WBGene00019207	WBGene00001210
			WBGene00000415	WBGene00016332
			WBGene00017418	WBGene00007255
			WBGene00020683	WBGene00021631
			WBGene00003653	WBGene00020377
			WBGene00020006	WBGene00016576
			WBGene00018191	WBGene00011199
			WBGene00023520	WBGene00021856
			WBGene00012062	WBGene00022801
			WBGene00020738	WBGene00010945
			WBGene00001747	WBGene00020126
			WBGene00013300	WBGene00012166
			WBGene00013894	WBGene00002025
			WBGene00009330	WBGene00012203
			WBGene00018319	WBGene00007993
			WBGene00018607	WBGene00017219
			WBGene00003401	WBGene00006710
			WBGene00003684	WBGene00044757
			WBGene00000637	WBGene00019347
			WBGene00012703	WBGene00000140
			WBGene00043980	WBGene00012607
			WBGene00022845	WBGene00009702
			WBGene00018212	WBGene00011524
			WBGene00012175	WBGene00004276
			WBGene00003393	WBGene00015852
			WBGene00016091	WBGene00002980
			WBGene00010872	WBGene00185088
			WBGene00010941	WBGene00004360
			WBGene00077557	WBGene00012315
			WBGene00018562	WBGene00000113
			WBGene00013352	WBGene00000112
			WBGene00006527	WBGene00018788
			WBGene00044385	WBGene00012987
			WBGene00016154	WBGene00012792
			WBGene00013746	WBGene00004205
			WBGene00019162	WBGene00016616
			WBGene00015158	WBGene00000424
			WBGene00020045	WBGene00044483
			WBGene00022170	WBGene00011054
			WBGene00020673	WBGene00006881
			WBGene00007952	WBGene00005725
			WBGene00020906	WBGene00017549
			WBGene00008165	WBGene00044154
			WBGene00020166	WBGene00013298
			WBGene00002092	WBGene00013319
			WBGene00019477	WBGene00022059
			WBGene00003403	WBGene00020469
			WBGene00009674	WBGene00011949
			WBGene00011404	WBGene00005882
			WBGene00016355	WBGene00012551
			WBGene00019445	WBGene00016745
			WBGene00022754	WBGene00001189
			WBGene00001463	WBGene00001768
			WBGene00021404	WBGene00018484
			WBGene00014233	WBGene00007324
			WBGene00015088	WBGene00012365
			WBGene00019988	WBGene00013612
			WBGene00015479	WBGene00019788
			WBGene00010331	WBGene00013492
			WBGene00015803	WBGene00013111
			WBGene00006640	WBGene00011409
			WBGene00011938	WBGene00012527
			WBGene00003577	WBGene00015745
			WBGene00011239	WBGene00016912
			WBGene00016801	WBGene00020698
			WBGene00007969	WBGene00045468
			WBGene00021334	WBGene00006727
			WBGene00009774	WBGene00019815
			WBGene00010187	WBGene00019205
			WBGene00014210	WBGene00017103
			WBGene00001977	WBGene00044016
			WBGene00000405	WBGene00043068
			WBGene00017421	WBGene00018417
			WBGene00004274	WBGene00007234
			WBGene00009257	WBGene00018763
			WBGene00015326	WBGene00021809
			WBGene00045316	WBGene00012976
			WBGene00007823	WBGene00018774
			WBGene00008783	WBGene00015815
			WBGene00011824	WBGene00000864
			WBGene00003718	WBGene00015016
			WBGene00013103	WBGene00013803
			WBGene00009093	WBGene00015817
			WBGene00000137	WBGene00015458
			WBGene00020224	WBGene00007701
			WBGene00007146	WBGene00001154
			WBGene00003800	WBGene00004440
			WBGene00044466	WBGene00018844
			WBGene00003636	WBGene00007557
			WBGene00002088	WBGene00008396
			WBGene00019627	WBGene00021036
			WBGene00000166	WBGene00138721
			WBGene00000633	WBGene00022219
			WBGene00045397	WBGene00010564
			WBGene00007243	WBGene00044427
			WBGene00011801	WBGene00050965
			WBGene00022502	WBGene00022738
			WBGene00001249	WBGene00002053
			WBGene00000175	WBGene00017036
			WBGene00004464	WBGene00013510
			WBGene00012744	WBGene00016333
			WBGene00016916	WBGene00001940
			WBGene00013307	WBGene00000184
			WBGene00022683	WBGene00010790
			WBGene00017744	WBGene00006698
			WBGene00003634	WBGene00020111
			WBGene00001983	WBGene00021907
			WBGene00015545	WBGene00044030
			WBGene00000172	WBGene00020281
			WBGene00015802	WBGene00022203
			WBGene00019554	WBGene00020585
			WBGene00011615	WBGene00017075
			WBGene00006537	WBGene00005737
			WBGene00022201	WBGene00006585
			WBGene00001533	WBGene00012252
			WBGene00008221	WBGene00021818
			WBGene00018365	WBGene00006236
			WBGene00014221	WBGene00008505
			WBGene00011643	WBGene00007160
			WBGene00019022	WBGene00012795
			WBGene00021394	WBGene00044037
			WBGene00012015	WBGene00044218
			WBGene00020897	WBGene00000020
			WBGene00007102	WBGene00013094
			WBGene00013083	WBGene00019555
			WBGene00017147	WBGene00020003
			WBGene00011918	WBGene00013511
			WBGene00008290	WBGene00013167
			WBGene00008936	WBGene00008279
			WBGene00013724	WBGene00018902
			WBGene00011309	WBGene00020616
			WBGene00014001	WBGene00013735
			WBGene00011680	WBGene00012724
			WBGene00013907	WBGene00017722
			WBGene00010259	WBGene00021877
			WBGene00015975	WBGene00006530
			WBGene00018756	WBGene00020222
			WBGene00013880	WBGene00044193
			WBGene00022119	WBGene00010748
			WBGene00002855	WBGene00023427
			WBGene00022018	WBGene00016275
			WBGene00008315	WBGene00019757
			WBGene00017382	WBGene00014806
			WBGene00012407	WBGene00008384
			WBGene00017597	WBGene00022380
			WBGene00004143	WBGene00044140
			WBGene00018847	WBGene00001153
			WBGene00019680	WBGene00012351
			WBGene00016911	WBGene00001169
			WBGene00020726	WBGene00001750
			WBGene00017779	WBGene00008191
			WBGene00001562	WBGene00013963
			WBGene00002075	WBGene00000760
			WBGene00004338	WBGene00021500
			WBGene00008269	WBGene00003579
			WBGene00017342	WBGene00020886
			WBGene00011684	WBGene00016474
			WBGene00016965	WBGene00045062
			WBGene00007463	WBGene00021082
			WBGene00019168	WBGene00009990
			WBGene00017038	WBGene00013442
			WBGene00017128	WBGene00007235
			WBGene00011556	WBGene00018052
			WBGene00003368	WBGene00010255
			WBGene00021551	WBGene00002044
			WBGene00006744	WBGene00000062
			WBGene00010793	WBGene00019966
			WBGene00018522	WBGene00044076
			WBGene00004211	WBGene00014870
			WBGene00002238	WBGene00008767
			WBGene00001395	WBGene00013619
			WBGene00001519	WBGene00009306
			WBGene00008587	WBGene00022690
			WBGene00008927	WBGene00021864
			WBGene00015037	WBGene00019011
			WBGene00016237	WBGene00002348
			WBGene00011443	WBGene00015230
			WBGene00017273	WBGene00006504
			WBGene00004254	WBGene00011367
			WBGene00044898	WBGene00003625
			WBGene00016196	WBGene00013349
			WBGene00007579	WBGene00003840
			WBGene00003386	WBGene00006436
			WBGene00012861	WBGene00013023
			WBGene00000275	WBGene00005467
			WBGene00001816	WBGene00016714
			WBGene00016083	WBGene00000220
			WBGene00003478	WBGene00011817
			WBGene00003588	WBGene00021813
			WBGene00013011	WBGene00020648
			WBGene00022271	WBGene00001531
			WBGene00000853	WBGene00000223
			WBGene00012340	WBGene00018490
			WBGene00010015	WBGene00007630
			WBGene00004753	WBGene00003921
			WBGene00010403	WBGene00018698
			WBGene00022004	WBGene00011647
			WBGene00003999	WBGene00017199
			WBGene00010670	WBGene00010700
			WBGene00009777	WBGene00007030
			WBGene00001423	WBGene00017287
			WBGene00008914	WBGene00017974
			WBGene00006811	WBGene00020217
			WBGene00016716	WBGene00007558
			WBGene00003907	WBGene00000899
			WBGene00015702	WBGene00009444
			WBGene00013591	WBGene00013170
			WBGene00000075	WBGene00013188
			WBGene00003149	WBGene00012307
			WBGene00020297	WBGene00000583
			WBGene00020417	WBGene00020057
			WBGene00018714	WBGene00016557
			WBGene00018343	WBGene00022110
			WBGene00010396	WBGene00013770
			WBGene00004738	WBGene00010994
			WBGene00001490	WBGene00023069
			WBGene00017048	WBGene00014803
			WBGene00003607	WBGene00004933
			WBGene00006893	WBGene00018867
			WBGene00015519	WBGene00010911
			WBGene00010197	WBGene00021445
			WBGene00021646	WBGene00015466
			WBGene00013498	WBGene00013677
			WBGene00006487	WBGene00010348
			WBGene00010735	WBGene00019100
			WBGene00044578	WBGene00011513
			WBGene00015739	WBGene00003678
			WBGene00008819	WBGene00020042
			WBGene00010909	WBGene00005847
			WBGene00001687	WBGene00022709
			WBGene00011939	WBGene00018874
			WBGene00006920	WBGene00008345
			WBGene00008951	WBGene00000942
			WBGene00022348	WBGene00002184
			WBGene00004391	WBGene00003744
			WBGene00002142	WBGene00006740
			WBGene00000420	WBGene00008969
			WBGene00022756	WBGene00003917
			WBGene00021158	WBGene00009314
			WBGene00004978	WBGene00018687
			WBGene00000225	WBGene00016656
			WBGene00000209	WBGene00018300
			WBGene00009264	WBGene00016627
			WBGene00001615	WBGene00021351
			WBGene00016326	WBGene00001162
			WBGene00044556	WBGene00010726
			WBGene00000967	WBGene00044782
			WBGene00005101	WBGene00000822
			WBGene00015410	WBGene00021219
			WBGene00004063	WBGene00013730
			WBGene00007103	WBGene00022670
			WBGene00011073	WBGene00022861
			WBGene00006598	WBGene00009850
			WBGene00020366	WBGene00018739
			WBGene00009686	WBGene00008740
			WBGene00012487	WBGene00015129
			WBGene00001501	WBGene00020620
			WBGene00018951	WBGene00018934
			WBGene00012185	WBGene00011708
			WBGene00020767	WBGene00011586
			WBGene00001281	WBGene00012567
			WBGene00015684	WBGene00016834
			WBGene00019662	WBGene00013214
			WBGene00001475	WBGene00006408
			WBGene00003845	WBGene00014794
			WBGene00015418	WBGene00001133
			WBGene00000266	WBGene00006528
			WBGene00044661	WBGene00015776
			WBGene00014848	WBGene00003931
			WBGene00014078	WBGene00013109
			WBGene00003524	WBGene00002010
			WBGene00000895	WBGene00013590
			WBGene00004364	WBGene00018550
			WBGene00003923	WBGene00019497
			WBGene00014248	WBGene00022312
			WBGene00020528	WBGene00021991
			WBGene00012403	WBGene00018299
			WBGene00013450	WBGene00012164
			WBGene00020181	WBGene00044211
			WBGene00018027	WBGene00011344
			WBGene00004038	WBGene00005642
			WBGene00011833	WBGene00001823
			WBGene00007246	WBGene00011855
			WBGene00003422	WBGene00012358
			WBGene00011800	WBGene00011131
			WBGene00001565	WBGene00006798
			WBGene00011397	WBGene00004478
			WBGene00008964	WBGene00021425
			WBGene00000934	WBGene00021083
			WBGene00018736	WBGene00000933
			WBGene00015644	WBGene00014005
			WBGene00015047	WBGene00004356
			WBGene00010553	WBGene00010194
			WBGene00012915	WBGene00023287
			WBGene00008270	WBGene00010221
			WBGene00004358	WBGene00185086
			WBGene00020601	WBGene00020708
			WBGene00005009	WBGene00005797
			WBGene00020437	WBGene00018596
			WBGene00003987	WBGene00021377
			WBGene00018639	WBGene00021471
			WBGene00009653	WBGene00044236
			WBGene00001992	WBGene00019533
			WBGene00007534	WBGene00013840
			WBGene00004467	WBGene00020449
			WBGene00000107	WBGene00018571
			WBGene00011799	WBGene00010316
			WBGene00006620	WBGene00013078
			WBGene00010288	WBGene00019770
			WBGene00001560	WBGene00015137
			WBGene00009118	WBGene00016855
			WBGene00007955	WBGene00016538
			WBGene00001844	WBGene00011841
			WBGene00002255	WBGene00010546
			WBGene00008052	WBGene00001112
			WBGene00009052	WBGene00020712
			WBGene00004909	WBGene00018911
			WBGene00015740	WBGene00018645
			WBGene00017865	WBGene00014207
			WBGene00016868	WBGene00011216
			WBGene00004367	WBGene00009018
			WBGene00022279	WBGene00010244
			WBGene00006621	WBGene00015294
			WBGene00000282	WBGene00007409
			WBGene00000218	WBGene00012421
			WBGene00018566	WBGene00020599
			WBGene00007587	WBGene00044414
			WBGene00012608	WBGene00011736
			WBGene00009488	WBGene00008440
			WBGene00010778	WBGene00013764
			WBGene00007943	WBGene00018862
			WBGene00018604	WBGene00011612
			WBGene00020138	WBGene00016020
			WBGene00000539	WBGene00000837
			WBGene00003156	WBGene00019960
			WBGene00020153	WBGene00045027
			WBGene00010970	WBGene00019888
			WBGene00006677	WBGene00006794
			WBGene00022389	WBGene00021075
			WBGene00015138	WBGene00021647
			WBGene00012583	WBGene00000627
			WBGene00015329	WBGene00013137
			WBGene00045458	WBGene00021106
			WBGene00003841	WBGene00014309
			WBGene00009796	WBGene00022495
			WBGene00002148	WBGene00016733
			WBGene00001325	WBGene00044453
			WBGene00000366	WBGene00018389
			WBGene00014666	WBGene00019316
			WBGene00005838	WBGene00016667
			WBGene00016973	WBGene00010271
			WBGene00007529	WBGene00006503
			WBGene00008430	WBGene00004201
			WBGene00004310	WBGene00021551
			WBGene00196752	WBGene00018705
			WBGene00019777	WBGene00000375
			WBGene00016292	WBGene00001329
			WBGene00008043	WBGene00019818
			WBGene00001396	WBGene00008671
			WBGene00012408	WBGene00015938
			WBGene00019466	WBGene00009623
			WBGene00001758	WBGene00016449
			WBGene00018189	WBGene00001512
			WBGene00019130	WBGene00021366
			WBGene00019902	WBGene00016551
			WBGene00019946	WBGene00003144
			WBGene00009887	WBGene00011957
			WBGene00003066	WBGene00020114
			WBGene00002043	WBGene00044745
			WBGene00009288	WBGene00008173
			WBGene00020235	WBGene00001425
			WBGene00017132	WBGene00021895
			WBGene00019915	WBGene00019221
			WBGene00016542	WBGene00021421
			WBGene00004267	WBGene00016437
			WBGene00008053	WBGene00021736
			WBGene00000298	WBGene00019839
			WBGene00012446	WBGene00021871
			WBGene00012658	WBGene00018659
			WBGene00016314	WBGene00017391
			WBGene00004924	WBGene00021866
			WBGene00008776	WBGene00022152
			WBGene00009552	WBGene00007756
			WBGene00009494	WBGene00019861
			WBGene00015067	WBGene00045058
			WBGene00021587	WBGene00020954
			WBGene00008601	WBGene00013751
			WBGene00000295	WBGene00001232
			WBGene00003914	WBGene00012273
			WBGene00011343	WBGene00020411
			WBGene00002210	WBGene00015406
			WBGene00000436	WBGene00019959
			WBGene00000259	WBGene00022117
			WBGene00007333	WBGene00002011
			WBGene00021279	WBGene00045182
			WBGene00000048	WBGene00022113
			WBGene00000870	WBGene00007639
			WBGene00006678	WBGene00001755
			WBGene00015588	WBGene00008193
			WBGene00044510	WBGene00020261
			WBGene00000156	WBGene00043948
			WBGene00003710	WBGene00011298
			WBGene00007840	WBGene00007266
			WBGene00015933	WBGene00015677
			WBGene00005019	WBGene00012235
			WBGene00000270	WBGene00013131
			WBGene00019345	WBGene00012295
			WBGene00011348	WBGene00022837
			WBGene00021491	WBGene00018564
			WBGene00022171	WBGene00005223
			WBGene00012363	WBGene00009683
			WBGene00016943	WBGene00013856
			WBGene00007073	WBGene00019332
			WBGene00020331	WBGene00018975
			WBGene00006667	WBGene00014689
			WBGene00007557	WBGene00021512
			WBGene00007591	WBGene00012814
			WBGene00017715	WBGene00002063
			WBGene00022573	WBGene00010362
			WBGene00010385	WBGene00011691
			WBGene00000976	WBGene00010554
			WBGene00014675	WBGene00019212
			WBGene00007428	WBGene00003258
			WBGene00044321	WBGene00005004
			WBGene00003898	WBGene00008343
			WBGene00017678	WBGene00005408
			WBGene00018115	WBGene00017513
			WBGene00017255	WBGene00012095
			WBGene00003573	WBGene00004104
			WBGene00020830	WBGene00009209
			WBGene00021893	WBGene00010948
			WBGene00004786	WBGene00011384
			WBGene00006524	WBGene00018214
			WBGene00044791	WBGene00020927
			WBGene00005929	WBGene00007062
			WBGene00009987	WBGene00000072
			WBGene00020114	WBGene00003242
			WBGene00016522	WBGene00044358
			WBGene00019759	WBGene00008433
			WBGene00001674	WBGene00014020
			WBGene00009663	WBGene00021107
			WBGene00002915	WBGene00044301
			WBGene00016879	WBGene00018581
			WBGene00004187	WBGene00001444
			WBGene00045399	WBGene00022522
			WBGene00000239	WBGene00015391
			WBGene00014219	WBGene00044650
			WBGene00004508	WBGene00013512
			WBGene00019599	WBGene00020681
			WBGene00003060	WBGene00003025
			WBGene00010408	WBGene00016835
			WBGene00003547	WBGene00009575
			WBGene00012259	WBGene00015643
			WBGene00007668	WBGene00019589
			WBGene00015162	WBGene00020134
			WBGene00012386	WBGene00012715
			WBGene00018041	WBGene00013002
			WBGene00017089	WBGene00009277
			WBGene00021796	WBGene00044534
			WBGene00020460	WBGene00017461
			WBGene00018872	WBGene00007441
			WBGene00015625	WBGene00019343
			WBGene00007851	WBGene00020647
			WBGene00009073	WBGene00003067
			WBGene00016562	WBGene00012745
			WBGene00003479	WBGene00017774
			WBGene00004255	WBGene00006219
			WBGene00020498	WBGene00017451
			WBGene00002036	WBGene00022725
			WBGene00019426	WBGene00006787
			WBGene00009819	WBGene00009733
			WBGene00023187	WBGene00012073
			WBGene00000511	WBGene00013354
			WBGene00017166	WBGene00001403
			WBGene00010311	WBGene00001929
			WBGene00009106	WBGene00019439
			WBGene00017654	WBGene00006389
			WBGene00015483	WBGene00012158
			WBGene00022166	WBGene00017455
			WBGene00018594	WBGene00015451
			WBGene00009395	WBGene00021773
			WBGene00003031	WBGene00014955
			WBGene00008607	WBGene00016380
			WBGene00013119	WBGene00010990
			WBGene00006442	WBGene00012113
			WBGene00044027	WBGene00005656
			WBGene00006410	WBGene00005787
			WBGene00006934	WBGene00015850
			WBGene00022721	WBGene00012146
			WBGene00004341	WBGene00022735
			WBGene00013985	WBGene00012472
			WBGene00002003	WBGene00018901
			WBGene00020353	WBGene00020177
			WBGene00020972	WBGene00019502
			WBGene00003575	WBGene00018085
			WBGene00020929	WBGene00015088
			WBGene00010811	WBGene00044046
			WBGene00003727	WBGene00023235
			WBGene00000900	WBGene00000224
			WBGene00003920	WBGene00000860
			WBGene00012887	WBGene00050912
			WBGene00001029	WBGene00007487
			WBGene00001093	WBGene00019671
			WBGene00022010	WBGene00009393
			WBGene00006008	WBGene00077496
			WBGene00004093	WBGene00023488
			WBGene00007801	WBGene00012265
			WBGene00009812	WBGene00020617
			WBGene00021556	WBGene00014963
			WBGene00016992	WBGene00012110
			WBGene00007931	WBGene00006133
			WBGene00000182	WBGene00015161
			WBGene00004879	WBGene00021333
			WBGene00044568	WBGene00000629
			WBGene00002035	WBGene00007463
			WBGene00018156	WBGene00016898
			WBGene00020023	WBGene00021663
			WBGene00010034	WBGene00000778
			WBGene00014093	WBGene00000142
			WBGene00008166	WBGene00014098
			WBGene00020115	WBGene00018113
			WBGene00022278	WBGene00016128
			WBGene00011139	WBGene00018745
			WBGene00011364	WBGene00014916
			WBGene00016589	WBGene00016965
			WBGene00019693	WBGene00021891
			WBGene00009436	WBGene00005283
			WBGene00000501	WBGene00015845
			WBGene00003079	WBGene00045390
			WBGene00003133	WBGene00019255
			WBGene00010473	WBGene00021180
			WBGene00002135	WBGene00006817
			WBGene00007184	WBGene00045197
			WBGene00013690	WBGene00014730
			WBGene00013666	WBGene00012829
			WBGene00044662	WBGene00008840
			WBGene00044697	WBGene00007525
			WBGene00019116	WBGene00016224
			WBGene00019803	WBGene00018797
			WBGene00021927	WBGene00021753
			WBGene00010667	WBGene00023104
			WBGene00016650	WBGene00013334
			WBGene00016704	WBGene00021898
			WBGene00015262	WBGene00021845
			WBGene00020887	WBGene00013610
			WBGene00016164	WBGene00013725
			WBGene00016456	WBGene00013093
			WBGene00022835	WBGene00004892
			WBGene00004270	WBGene00014933
			WBGene00010892	WBGene00006414
			WBGene00000070	WBGene00015065
			WBGene00019504	WBGene00009749
			WBGene00022580	WBGene00019649
			WBGene00003006	WBGene00011551
			WBGene00001182	WBGene00012150
			WBGene00015577	WBGene00007017
			WBGene00001722	WBGene00006008
			WBGene00006059	WBGene00000041
			WBGene00017925	WBGene00001933
			WBGene00011263	WBGene00014772
			WBGene00009375	WBGene00014820
			WBGene00020549	WBGene00044127
			WBGene00000833	WBGene00014663
			WBGene00001449	WBGene00000973
			WBGene00001177	WBGene00018291
			WBGene00013059	WBGene00016886
			WBGene00003015	WBGene00119201
			WBGene00017367	WBGene00011279
			WBGene00006212	WBGene00009822
			WBGene00018266	WBGene00018598
			WBGene00015283	WBGene00011205
			WBGene00045419	WBGene00021284
			WBGene00003085	WBGene00012799
			WBGene00010345	WBGene00008970
			WBGene00020569	WBGene00044632
			WBGene00001631	WBGene00013858
			WBGene00017487	WBGene00017862
			WBGene00015632	WBGene00013551
			WBGene00004754	WBGene00009534
			WBGene00019871	WBGene00017397
			WBGene00020586	WBGene00003581
			WBGene00017794	WBGene00018328
			WBGene00010806	WBGene00006814
			WBGene00044319	WBGene00006769
			WBGene00044989	WBGene00015688
			WBGene00015171	WBGene00018500
			WBGene00007520	WBGene00019158
			WBGene00019655	WBGene00000687
			WBGene00013187	WBGene00008766
			WBGene00019434	WBGene00016125
			WBGene00004468	WBGene00003177
			WBGene00004138	WBGene00006496
			WBGene00021844	WBGene00020666
			WBGene00001137	WBGene00013313
			WBGene00011794	WBGene00001916
			WBGene00003123	WBGene00050959
			WBGene00003955	WBGene00008718
			WBGene00000933	WBGene00014761
			WBGene00004337	WBGene00022427
			WBGene00010834	WBGene00020754
			WBGene00007812	WBGene00020381
			WBGene00020479	WBGene00007131
			WBGene00020902	WBGene00017450
			WBGene00000521	WBGene00010038
			WBGene00010665	WBGene00023408
			WBGene00010097	WBGene00012895
			WBGene00018512	WBGene00008438
			WBGene00010332	WBGene00013603
			WBGene00001588	WBGene00011579
			WBGene00007650	WBGene00004479
			WBGene00015389	WBGene00002078
			WBGene00006580	WBGene00013774
			WBGene00001130	WBGene00020899
			WBGene00019342	WBGene00006446
			WBGene00018193	WBGene00005005
			WBGene00019603	WBGene00019070
			WBGene00013068	WBGene00008134
			WBGene00007411	WBGene00008575
			WBGene00019492	WBGene00000185
			WBGene00044411	WBGene00006444
			WBGene00010110	WBGene00044253
			WBGene00044675	WBGene00050938
			WBGene00008687	WBGene00015785
			WBGene00006679	WBGene00002983
			WBGene00000148	WBGene00021971
			WBGene00015079	WBGene00009291
			WBGene00018133	WBGene00009050
			WBGene00015671	WBGene00007747
			WBGene00006220	WBGene00016634
			WBGene00011814	WBGene00018268
			WBGene00021626	WBGene00019139
			WBGene00009468	WBGene00012370
			WBGene00020301	WBGene00017304
			WBGene00017193	WBGene00006234
			WBGene00015508	WBGene00021784
			WBGene00013575	WBGene00014863
			WBGene00002029	WBGene00018118
			WBGene00006856	WBGene00013110
			WBGene00044068	WBGene00020604
			WBGene00001248	WBGene00006498
			WBGene00009619	WBGene00016691
			WBGene00019322	WBGene00015405
			WBGene00016046	WBGene00014217
			WBGene00016463	WBGene00019122
			WBGene00000479	WBGene00014793
			WBGene00000507	WBGene00077636
			WBGene00003176	WBGene00021926
			WBGene00008805	WBGene00022101
			WBGene00017960	WBGene00003182
			WBGene00004126	WBGene00013279
			WBGene00016150	WBGene00006588
			WBGene00013694	WBGene00019160
			WBGene00020299	WBGene00001735
			WBGene00001708	WBGene00021867
			WBGene00008730	WBGene00000427
			WBGene00013147	WBGene00001884
			WBGene00018898	WBGene00020318
			WBGene00016888	WBGene00009350
			WBGene00013667	WBGene00017644
			WBGene00015934	WBGene00018378
			WBGene00001088	WBGene00012106
			WBGene00022574	WBGene00018538
			WBGene00011331	WBGene00013020
			WBGene00007056	WBGene00011523
			WBGene00015233	WBGene00003596
			WBGene00011064	WBGene00000551
			WBGene00018375	WBGene00019698
			WBGene00013223	WBGene00008607
			WBGene00003072	WBGene00022615
			WBGene00006591	WBGene00002054
			WBGene00006944	WBGene00001030
			WBGene00017867	WBGene00010882
			WBGene00008084	WBGene00012576
			WBGene00003136	WBGene00044289
			WBGene00044286	WBGene00017468
			WBGene00004928	WBGene00021009
			WBGene00022485	WBGene00022457
			WBGene00021960	WBGene00022466
			WBGene00005811	WBGene00014064
			WBGene00012811	WBGene00006888
			WBGene00000585	WBGene00016041
			WBGene00017887	WBGene00008857
			WBGene00006467	WBGene00138717
			WBGene00005077	WBGene00006833
			WBGene00004513	WBGene00005741
			WBGene00001523	WBGene00001228
			WBGene00010448	WBGene00008672
			WBGene00012419	WBGene00006097
			WBGene00006971	WBGene00016980
			WBGene00015132	WBGene00001113
			WBGene00016490	WBGene00020438
			WBGene00017433	WBGene00020914
			WBGene00008748	WBGene00014023
			WBGene00018757	WBGene00003184
			WBGene00017379	WBGene00014926
			WBGene00014176	WBGene00018143
			WBGene00021814	WBGene00000987
			WBGene00006918	WBGene00013697
			WBGene00009881	WBGene00010876
			WBGene00006809	WBGene00016584
			WBGene00016710	WBGene00044243
			WBGene00002136	WBGene00000976
			WBGene00009799	WBGene00007099
			WBGene00020268	WBGene00045496
			WBGene00003686	WBGene00018472
			WBGene00009312	WBGene00022478
			WBGene00007590	WBGene00012768
			WBGene00011111	WBGene00012741
			WBGene00001505	WBGene00007334
			WBGene00017745	WBGene00022303
			WBGene00012633	WBGene00011608
			WBGene00004779	WBGene00008861
			WBGene00013569	WBGene00006062
			WBGene00007720	WBGene00012196
			WBGene00015547	WBGene00020963
			WBGene00044061	WBGene00010934
			WBGene00003922	WBGene00010815
			WBGene00019853	WBGene00018420
			WBGene00015978	WBGene00019002
			WBGene00006747	WBGene00020391
			WBGene00002258	WBGene00012758
			WBGene00003656	WBGene00019063
			WBGene00015791	WBGene00077443
			WBGene00010424	WBGene00015925
			WBGene00000080	WBGene00013027
			WBGene00016630	WBGene00007644
			WBGene00000003	WBGene00009573
			WBGene00020263	WBGene00021277
			WBGene00018654	WBGene00007090
			WBGene00015324	WBGene00009546
			WBGene00009144	WBGene00018145
			WBGene00020904	WBGene00016674
			WBGene00004245	WBGene00010319
			WBGene00009336	WBGene00021999
			WBGene00010040	WBGene00013611
			WBGene00002637	WBGene00012219
			WBGene00004503	WBGene00001942
			WBGene00000754	WBGene00019636
			WBGene00006861	WBGene00019079
			WBGene00003150	WBGene00015593
			WBGene00018341	WBGene00001402
			WBGene00016939	WBGene00015031
			WBGene00043049	WBGene00019174
			WBGene00019519	WBGene00045315
			WBGene00018138	WBGene00018631
			WBGene00002213	WBGene00000366
			WBGene00015586	WBGene00015746
			WBGene00000288	WBGene00016392
			WBGene00020508	WBGene00003624
			WBGene00022661	WBGene00044768
			WBGene00004793	WBGene00014962
			WBGene00009593	WBGene00022834
			WBGene00006832	WBGene00010530
			WBGene00021834	WBGene00050930
			WBGene00001665	WBGene00016022
			WBGene00004889	WBGene00000170
			WBGene00014821	WBGene00006825
			WBGene00010000	WBGene00002222
			WBGene00011746	WBGene00015680
			WBGene00015007	WBGene00011341
			WBGene00017530	WBGene00008423
			WBGene00010557	WBGene00019485
			WBGene00010730	WBGene00003708
			WBGene00016268	WBGene00007126
			WBGene00008989	WBGene00004891
			WBGene00006064	WBGene00012094
			WBGene00017063	WBGene00008821
			WBGene00011944	WBGene00014925
			WBGene00012364	WBGene00021068
			WBGene00022675	WBGene00001966
			WBGene00006745	WBGene00018621
			WBGene00022777	WBGene00006637
			WBGene00010115	WBGene00014164
			WBGene00044630	WBGene00017285
			WBGene00017548	WBGene00011746
			WBGene00003012	WBGene00044280
			WBGene00010522	WBGene00008582
			WBGene00011930	WBGene00019593
			WBGene00011827	WBGene00001446
			WBGene00020169	WBGene00021381
			WBGene00017766	WBGene00013950
			WBGene00013720	WBGene00014061
			WBGene00018161	WBGene00020729
			WBGene00010070	WBGene00044758
			WBGene00020532	WBGene00016807
			WBGene00013695	WBGene00044720
			WBGene00021920	WBGene00000516
			WBGene00013850	WBGene00019303
			WBGene00004111	WBGene00009690
			WBGene00009334	WBGene00017970
			WBGene00009389	WBGene00019072
			WBGene00003788	WBGene00007148
			WBGene00019844	WBGene00044511
			WBGene00007550	WBGene00007631
			WBGene00003792	WBGene00020173
			WBGene00010094	WBGene00009735
			WBGene00003019	WBGene00044429
			WBGene00013231	WBGene00021047
			WBGene00014011	WBGene00001943
			WBGene00004244	WBGene00017294
			WBGene00002073	WBGene00019134
			WBGene00022794	WBGene00014729
			WBGene00009835	WBGene00194984
			WBGene00001863	WBGene00012764
			WBGene00001411	WBGene00017133
			WBGene00008361	WBGene00003567
			WBGene00010433	WBGene00007898
			WBGene00015646	WBGene00014789
			WBGene00001645	WBGene00001456
			WBGene00009307	WBGene00000181
			WBGene00009016	WBGene00009442
			WBGene00009664	WBGene00004425
			WBGene00001165	WBGene00021392
			WBGene00012016	WBGene00018814
			WBGene00022490	WBGene00017828
			WBGene00008735	WBGene00013082
			WBGene00007197	WBGene00016737
			WBGene00019977	WBGene00004883
			WBGene00001824	WBGene00000378
			WBGene00018211	WBGene00006640
			WBGene00003001	WBGene00019598
			WBGene00004343	WBGene00045185
			WBGene00011097	WBGene00018732
			WBGene00009318	WBGene00003637
			WBGene00006669	WBGene00044201
			WBGene00007177	WBGene00000380
			WBGene00000393	WBGene00017459
			WBGene00003523	WBGene00006634
			WBGene00010683	WBGene00012117
			WBGene00001330	WBGene00013482
			WBGene00009361	WBGene00021188
			WBGene00021874	WBGene00016252
			WBGene00015350	WBGene00005435
			WBGene00013924	WBGene00001831
			WBGene00003956	WBGene00000832
			WBGene00002153	WBGene00044083
			WBGene00009650	WBGene00006587
			WBGene00003030	WBGene00006802
			WBGene00013030	WBGene00005529
			WBGene00011136	WBGene00004102
			WBGene00007048	WBGene00016663
			WBGene00009932	WBGene00001671
			WBGene00007695	WBGene00016316
			WBGene00006785	WBGene00018537
			WBGene00003048	WBGene00010177
			WBGene00003373	WBGene00044501
			WBGene00022613	WBGene00010457
			WBGene00012513	WBGene00008041
			WBGene00019079	WBGene00004153
			WBGene00003736	WBGene00016257
			WBGene00011633	WBGene00012188
			WBGene00003849	WBGene00018064
			WBGene00006477	WBGene00019280
			WBGene00022518	WBGene00004320
			WBGene00008308	WBGene00019448
			WBGene00006468	WBGene00007661
			WBGene00000412	WBGene00018664
			WBGene00022301	WBGene00012870
			WBGene00006565	WBGene00010371
			WBGene00009120	WBGene00022077
			WBGene00006396	WBGene00012239
			WBGene00020634	WBGene00019064
			WBGene00009379	WBGene00000254
			WBGene00016313	WBGene00009123
			WBGene00003681	WBGene00010481
			WBGene00001814	WBGene00007414
			WBGene00006844	WBGene00022872
			WBGene00018415	WBGene00013597
			WBGene00011399	WBGene00007604
			WBGene00001644	WBGene00000203
			WBGene00003882	WBGene00002130
			WBGene00011339	WBGene00016197
			WBGene00010780	WBGene00001537
			WBGene00010137	WBGene00017995
			WBGene00000951	WBGene00004115
			WBGene00020593	WBGene00022590
			WBGene00001470	WBGene00020737
			WBGene00008973	WBGene00045364
			WBGene00006916	WBGene00001603
			WBGene00022722	WBGene00015883
[truncated: 601 more rows]

## Sheet: Cluster 1
Category	Term	Count	%	PValue	Genes	List Total	Pop Hits	Pop Total	Fold Enrichment	Bonferroni	Benjamini	FDR
GOTERM_MF_DIRECT	GO:0042302~structural constituent of cuticle	52	12.5604	1.0814e-48	WBGENE00000742, WBGENE00000741, WBGENE00000740, WBGENE00000746, WBGENE00000681, WBGENE00001067, WBGENE00000747, WBGENE00000693, WBGENE00000673, WBGENE00000696, WBGENE00001074, WBGENE00000697, WBGENE00000704, WBGENE00001072, WBGENE00001071, WBGENE00001070, WBGENE00000679, WBGENE00000733, WBGENE00000601, WBGENE00000603, WBGENE00000738, WBGENE00000609, WBGENE00000596, WBGENE00000691, WBGENE00000735,…	183	168	9479	16.0327	1.66535e-46	1.66535e-46	1.29725e-45
GOTERM_CC_DIRECT	GO:0005581~collagen trimer	48	11.5942	1.77841e-42	WBGENE00000742, WBGENE00000741, WBGENE00000740, WBGENE00000746, WBGENE00000681, WBGENE00003057, WBGENE00001067, WBGENE00000747, WBGENE00000656, WBGENE00000673, WBGENE00000693, WBGENE00000723, WBGENE00000696, WBGENE00000618, WBGENE00001074, WBGENE00000697, WBGENE00000616, WBGENE00001072, WBGENE00000704, WBGENE00000727, WBGENE00000702, WBGENE00000679, WBGENE00000610, WBGENE00000720, WBGENE00000733,…	211	174	11373	14.8691	1.19154e-40	1.19154e-40	1.82399e-39
GOTERM_BP_DIRECT	GO:0010171~body morphogenesis	35	8.45411	5.90819e-09	WBGENE00000742, WBGENE00000741, WBGENE00000157, WBGENE00000740, WBGENE00022591, WBGENE00000437, WBGENE00000083, WBGENE00003057, WBGENE00001067, WBGENE00001077, WBGENE00000673, WBGENE00000696, WBGENE00001074, WBGENE00021415, WBGENE00001072, WBGENE00001071, WBGENE00000727, WBGENE00001070, WBGENE00000282, WBGENE00004397, WBGENE00002051, WBGENE00005018, WBGENE00005016, WBGENE00000609, WBGENE00000691,…	213	616	11627	3.10153	1.69565e-06	1.69565e-06	7.84178e-06
GOTERM_BP_DIRECT	GO:0040002~collagen and cuticulin-based cuticle development	15	3.62319	1.63443e-08	WBGENE00004397, WBGENE00005018, WBGENE00000603, WBGENE00022591, WBGENE00005016, WBGENE00001067, WBGENE00000656, WBGENE00001077, WBGENE00001074, WBGENE00019154, WBGENE00001072, WBGENE00000616, WBGENE00001070, WBGENE00001064, WBGENE00001065	213	113	11627	7.24604	4.69081e-06	2.34541e-06	2.16933e-05
GOTERM_BP_DIRECT	GO:0040011~locomotion	54	13.0435	1.3362e-07	WBGENE00000742, WBGENE00000741, WBGENE00000740, WBGENE00022591, WBGENE00018928, WBGENE00000083, WBGENE00000437, WBGENE00000039, WBGENE00001077, WBGENE00000673, WBGENE00000696, WBGENE00001074, WBGENE00021415, WBGENE00001072, WBGENE00001071, WBGENE00001070, WBGENE00007999, WBGENE00006956, WBGENE00001699, WBGENE00001694, WBGENE00000691, WBGENE00000684, WBGENE00004164, WBGENE00003887, WBGENE00018027,…	213	1405	11627	2.098	3.83483e-05	1.27829e-05	0.00017735
GOTERM_CC_DIRECT	GO:0005576~extracellular region	21	5.07246	3.16707e-06	WBGENE00006947, WBGENE00012261, WBGENE00001694, WBGENE00015510, WBGENE00000857, WBGENE00011561, WBGENE00005018, WBGENE00000603, WBGENE00009983, WBGENE00003766, WBGENE00003767, WBGENE00006592, WBGENE00003768, WBGENE00002393, WBGENE00003769, WBGENE00010539, WBGENE00001072, WBGENE00013127, WBGENE00012257, WBGENE00012256, WBGENE00012255	211	331	11373	3.41967	0.000212172	0.000106092	0.0032482
GOTERM_BP_DIRECT	GO:0044765~single-organism transport	5	1.20773	3.6027e-06	WBGENE00012261, WBGENE00002393, WBGENE00012257, WBGENE00012256, WBGENE00012255	213	7	11627	38.9906	0.00103344	0.000258461	0.00478166
GOTERM_CC_DIRECT	GO:0005615~extracellular space	17	4.10628	2.32097e-05	WBGENE00020339, WBGENE00006947, WBGENE00020566, WBGENE00000857, WBGENE00007304, WBGENE00016505, WBGENE00011561, WBGENE00020049, WBGENE00020335, WBGENE00003767, WBGENE00013895, WBGENE00010539, WBGENE00044788, WBGENE00011284, WBGENE00007142, WBGENE00000556, WBGENE00010225	211	258	11373	3.55158	0.00155386	0.000518221	0.023802
GOTERM_CC_DIRECT	GO:0060102~collagen and cuticulin-based cuticle extracellular matrix	5	1.20773	3.36764e-05	WBGENE00001074, WBGENE00004397, WBGENE00005018, WBGENE00003057, WBGENE00001067	211	11	11373	24.5002	0.00225381	0.00056393	0.0345341
GOTERM_MF_DIRECT	GO:0042329~structural constituent of collagen and cuticulin-based cuticle	6	1.44928	4.98831e-05	WBGENE00004397, WBGENE00001072, WBGENE00005016, WBGENE00003057, WBGENE00001064, WBGENE00001067	183	22	9479	14.1267	0.00765276	0.00383373	0.0598235
GOTERM_BP_DIRECT	GO:0055114~oxidation-reduction process	23	5.55556	0.00021662	WBGENE00019489, WBGENE00017340, WBGENE00000969, WBGENE00015512, WBGENE00009980, WBGENE00022766, WBGENE00001993, WBGENE00000115, WBGENE00016920, WBGENE00019819, WBGENE00010661, WBGENE00001077, WBGENE00000984, WBGENE00016201, WBGENE00011398, WBGENE00009944, WBGENE00000990, WBGENE00019154, WBGENE00020917, WBGENE00010595, WBGENE00185014, WBGENE00001479, WBGENE00000979	213	522	11627	2.40517	0.0602831	0.0123583	0.287132
GOTERM_MF_DIRECT	GO:0016491~oxidoreductase activity	20	4.83092	0.000466784	WBGENE00019489, WBGENE00000969, WBGENE00015512, WBGENE00009980, WBGENE00001993, WBGENE00022766, WBGENE00000115, WBGENE00019819, WBGENE00001077, WBGENE00000984, WBGENE00010661, WBGENE00016201, WBGENE00011398, WBGENE00009944, WBGENE00000990, WBGENE00019154, WBGENE00010595, WBGENE00185014, WBGENE00001479, WBGENE00000979	183	422	9479	2.45487	0.0693775	0.0236823	0.55852
GOTERM_MF_DIRECT	GO:0051213~dioxygenase activity	5	1.20773	0.000874924	WBGENE00001077, WBGENE00016201, WBGENE00019489, WBGENE00010595, WBGENE00001993	183	23	9479	11.2604	0.126107	0.0331378	1.04453
GOTERM_BP_DIRECT	GO:0018996~molting cycle, collagen and cuticulin-based cuticle	14	3.38164	0.00341448	WBGENE00001699, WBGENE00006947, WBGENE00001694, WBGENE00022591, WBGENE00004229, WBGENE00000083, WBGENE00000039, WBGENE00009926, WBGENE00011831, WBGENE00006592, WBGENE00019154, WBGENE00007999, WBGENE00011325, WBGENE00003485	213	300	11627	2.54739	0.625301	0.150923	4.43819
GOTERM_BP_DIRECT	GO:0040018~positive regulation of multicellular organism growth	15	3.62319	0.00582027	WBGENE00001699, WBGENE00006947, WBGENE00001694, WBGENE00000083, WBGENE00000437, WBGENE00020784, WBGENE00000039, WBGENE00003017, WBGENE00001077, WBGENE00019154, WBGENE00001070, WBGENE00007934, WBGENE00001703, WBGENE00001702, WBGENE00006956	213	357	11627	2.29357	0.812748	0.212843	7.45512
GOTERM_BP_DIRECT	GO:0007218~neuropeptide signaling pathway	7	1.69082	0.00665033	WBGENE00003766, WBGENE00003767, WBGENE00003768, WBGENE00003769, WBGENE00003762, WBGENE00003763, WBGENE00003765	213	92	11627	4.15335	0.852661	0.212882	8.47544

## Sheet: Cluster 2
Category	Term	Count	%	PValue	Genes	List Total	Pop Hits	Pop Total	Fold Enrichment	Bonferroni	Benjamini	FDR
GOTERM_CC_DIRECT	GO:0000786~nucleosome	22	7.09677	9.27369e-21	WBGENE00001940, WBGENE00001892, WBGENE00001942, WBGENE00001893, WBGENE00001885, WBGENE00001896, WBGENE00001919, WBGENE00001854, WBGENE00001909, WBGENE00001908, WBGENE00001915, WBGENE00001904, WBGENE00001935, WBGENE00001936, WBGENE00001937, WBGENE00001912, WBGENE00001938, WBGENE00001913, WBGENE00001921, WBGENE00001891, WBGENE00001890, WBGENE00001932	154	90	11373	18.0524	7.51169e-19	7.51169e-19	9.88327e-18
GOTERM_MF_DIRECT	GO:0046982~protein heterodimerization activity	22	7.09677	2.32198e-18	WBGENE00001940, WBGENE00001892, WBGENE00001942, WBGENE00001893, WBGENE00001885, WBGENE00001896, WBGENE00001919, WBGENE00001909, WBGENE00001908, WBGENE00001915, WBGENE00001904, WBGENE00001935, WBGENE00001936, WBGENE00001937, WBGENE00001912, WBGENE00001938, WBGENE00001913, WBGENE00001921, WBGENE00001891, WBGENE00009584, WBGENE00001890, WBGENE00001932	149	101	9479	13.8573	3.36687e-16	3.36687e-16	2.75656e-15
GOTERM_BP_DIRECT	GO:0006334~nucleosome assembly	16	5.16129	2.80746e-13	WBGENE00001940, WBGENE00001892, WBGENE00001885, WBGENE00001896, WBGENE00001919, WBGENE00001854, WBGENE00001908, WBGENE00001915, WBGENE00001936, WBGENE00001937, WBGENE00001912, WBGENE00001938, WBGENE00001913, WBGENE00009277, WBGENE00001891, WBGENE00001932	172	77	11627	14.0465	8.36711e-11	8.36711e-11	3.74822e-10
GOTERM_CC_DIRECT	GO:0000788~nuclear nucleosome	8	2.58065	1.20741e-09	WBGENE00001915, WBGENE00001940, WBGENE00001936, WBGENE00001885, WBGENE00001913, WBGENE00001896, WBGENE00001932, WBGENE00001908	154	17	11373	34.7532	9.78e-08	4.89e-08	1.28677e-06
GOTERM_BP_DIRECT	GO:0006342~chromatin silencing	7	2.25806	4.18859e-07	WBGENE00001935, WBGENE00001904, WBGENE00001893, WBGENE00001942, WBGENE00001921, WBGENE00001909, WBGENE00001890	172	21	11627	22.5329	0.000124812	6.24081e-05	0.00055915
GOTERM_CC_DIRECT	GO:0005811~lipid particle	7	2.25806	1.58524e-06	WBGENE00001915, WBGENE00001940, WBGENE00001936, WBGENE00001885, WBGENE00001896, WBGENE00001932, WBGENE00001908	154	28	11373	18.4627	0.000128397	4.28007e-05	0.00168943
GOTERM_CC_DIRECT	GO:0000790~nuclear chromatin	8	2.58065	3.22303e-06	WBGENE00001935, WBGENE00001904, WBGENE00001893, WBGENE00001942, WBGENE00012005, WBGENE00001921, WBGENE00001909, WBGENE00001890	154	48	11373	12.3084	0.000261031	6.52643e-05	0.00343483
GOTERM_CC_DIRECT	GO:0005634~nucleus	49	15.8065	4.23323e-06	WBGENE00003604, WBGENE00044501, WBGENE00009052, WBGENE00011254, WBGENE00003695, WBGENE00016508, WBGENE00001935, WBGENE00001937, WBGENE00001938, WBGENE00018967, WBGENE00012969, WBGENE00003834, WBGENE00003025, WBGENE00008662, WBGENE00012717, WBGENE00007704, WBGENE00000498, WBGENE00000097, WBGENE00004700, WBGENE00001921, WBGENE00001892, WBGENE00001893, WBGENE00016574, WBGENE00019511, WBGENE00010476,…	154	1888	11373	1.91667	0.000342833	6.8576e-05	0.00451139
GOTERM_BP_DIRECT	GO:0009792~embryo development ending in birth or egg hatching	72	23.2258	1.41908e-05	WBGENE00013808, WBGENE00009052, WBGENE00006624, WBGENE00016508, WBGENE00016509, WBGENE00020744, WBGENE00011116, WBGENE00004429, WBGENE00010546, WBGENE00001935, WBGENE00001075, WBGENE00015291, WBGENE00001936, WBGENE00001937, WBGENE00001938, WBGENE00009205, WBGENE00011591, WBGENE00001030, WBGENE00018967, WBGENE00012158, WBGENE00010882, WBGENE00001932, WBGENE00004017, WBGENE00013563, WBGENE00003834,…	172	3091	11627	1.57461	0.00421995	0.00140863	0.0189422
GOTERM_MF_DIRECT	GO:0003677~DNA binding	30	9.67742	1.4949e-05	WBGENE00001892, WBGENE00003604, WBGENE00001893, WBGENE00001896, WBGENE00003695, WBGENE00001919, WBGENE00001854, WBGENE00001915, WBGENE00001935, WBGENE00001936, WBGENE00001937, WBGENE00001912, WBGENE00018591, WBGENE00001938, WBGENE00001913, WBGENE00001932, WBGENE00001940, WBGENE00001942, WBGENE00001885, WBGENE00013483, WBGENE00016115, WBGENE00003025, WBGENE00020961, WBGENE00012005, WBGENE00001909,…	149	804	9479	2.37379	0.00216528	0.00108323	0.0177455
GOTERM_BP_DIRECT	GO:0040011~locomotion	37	11.9355	0.000562309	WBGENE00001892, WBGENE00013808, WBGENE00001893, WBGENE00020349, WBGENE00001896, WBGENE00004495, WBGENE00006624, WBGENE00016574, WBGENE00010977, WBGENE00016508, WBGENE00003161, WBGENE00016509, WBGENE00000065, WBGENE00004429, WBGENE00001915, WBGENE00001913, WBGENE00001910, WBGENE00006953, WBGENE00018967, WBGENE00001932, WBGENE00001940, WBGENE00019760, WBGENE00016115, WBGENE00021653, WBGENE00003025,…	172	1405	11627	1.78018	0.154321	0.041038	0.748047
GOTERM_MF_DIRECT	GO:0051082~unfolded protein binding	6	1.93548	0.000576665	WBGENE00018782, WBGENE00000378, WBGENE00013735, WBGENE00001030, WBGENE00002012, WBGENE00000915	149	44	9479	8.67511	0.0802381	0.0274951	0.682451
GOTERM_BP_DIRECT	GO:0002119~nematode larval development	47	15.1613	0.000851857	WBGENE00001892, WBGENE00013808, WBGENE00001893, WBGENE00017921, WBGENE00001896, WBGENE00022789, WBGENE00004495, WBGENE00006624, WBGENE00016574, WBGENE00010476, WBGENE00016508, WBGENE00000065, WBGENE00001919, WBGENE00011116, WBGENE00004429, WBGENE00001915, WBGENE00001935, WBGENE00001075, WBGENE00001936, WBGENE00001937, WBGENE00001912, WBGENE00001913, WBGENE00001910, WBGENE00018967, WBGENE00021843,…	172	1993	11627	1.59415	0.224278	0.049524	1.13122
GOTERM_CC_DIRECT	GO:0005694~chromosome	7	2.25806	0.00148003	WBGENE00001915, WBGENE00001940, WBGENE00001942, WBGENE00001937, WBGENE00001913, WBGENE00001854, WBGENE00001909	154	92	11373	5.61907	0.113054	0.0197967	1.5661
GOTERM_BP_DIRECT	GO:0040035~hermaphrodite genitalia development	21	6.77419	0.00590018	WBGENE00001940, WBGENE00001892, WBGENE00013808, WBGENE00020349, WBGENE00003025, WBGENE00021653, WBGENE00003161, WBGENE00016250, WBGENE00016509, WBGENE00000065, WBGENE00000915, WBGENE00011116, WBGENE00001935, WBGENE00001936, WBGENE00000378, WBGENE00001912, WBGENE00013735, WBGENE00018967, WBGENE00004700, WBGENE00021843, WBGENE00001932	172	738	11627	1.92354	0.82855	0.254657	7.59574

## Sheet: Cluster 4
Category	Term	Count	%	PValue	Genes	List Total	Pop Hits	Pop Total	Fold Enrichment	Bonferroni	Benjamini	FDR
GOTERM_BP_DIRECT	GO:0006810~transport	228	8.98699	6.49015e-20	WBGENE00002258, WBGENE00008052, WBGENE00002257, WBGENE00002256, WBGENE00006910, WBGENE00002255, WBGENE00006916, WBGENE00019205, WBGENE00006918, WBGENE00010419, WBGENE00010701, WBGENE00006526, WBGENE00003408, WBGENE00003407, WBGENE00003409, WBGENE00013300, WBGENE00008819, WBGENE00010214, WBGENE00010117, WBGENE00006920, WBGENE00002073, WBGENE00006614, WBGENE00000934, WBGENE00006829, WBGENE00015479,…	1857	810	11627	1.7624	1.05465e-16	1.05465e-16	1.0888e-16
GOTERM_BP_DIRECT	GO:0006811~ion transport	110	4.33583	3.73982e-12	WBGENE00004830, WBGENE00006910, WBGENE00001137, WBGENE00013487, WBGENE00006916, WBGENE00019205, WBGENE00006918, WBGENE00020569, WBGENE00013534, WBGENE00010419, WBGENE00006526, WBGENE00007862, WBGENE00013300, WBGENE00000229, WBGENE00008819, WBGENE00010117, WBGENE00020657, WBGENE00006920, WBGENE00012915, WBGENE00006614, WBGENE00011354, WBGENE00022336, WBGENE00003571, WBGENE00006685, WBGENE00006747,…	1857	360	11627	1.91314	6.07715e-09	3.03858e-09	6.27394e-09
GOTERM_CC_DIRECT	GO:0005886~plasma membrane	154	6.07016	2.46371e-11	WBGENE00001137, WBGENE00006916, WBGENE00020784, WBGENE00004740, WBGENE00010701, WBGENE00011803, WBGENE00003407, WBGENE00003239, WBGENE00000225, WBGENE00003588, WBGENE00009552, WBGENE00003403, WBGENE00002265, WBGENE00020657, WBGENE00012915, WBGENE00000934, WBGENE00015479, WBGENE00003232, WBGENE00000402, WBGENE00000102, WBGENE00000548, WBGENE00008570, WBGENE00018349, WBGENE00004364, WBGENE00016625,…	1769	593	11373	1.6696	1.09142e-08	1.09142e-08	3.48742e-08
GOTERM_CC_DIRECT	GO:0045202~synapse	54	2.1285	8.99573e-11	WBGENE00004830, WBGENE00020528, WBGENE00001588, WBGENE00000084, WBGENE00001281, WBGENE00009799, WBGENE00001177, WBGENE00020114, WBGENE00004921, WBGENE00004032, WBGENE00001594, WBGENE00001593, WBGENE00013746, WBGENE00012915, WBGENE00020657, WBGENE00006755, WBGENE00001519, WBGENE00000045, WBGENE00000048, WBGENE00004316, WBGENE00000501, WBGENE00000054, WBGENE00000053, WBGENE00004364, WBGENE00017580,…	1769	140	11373	2.47978	3.98511e-08	1.99256e-08	1.27336e-07
GOTERM_BP_DIRECT	GO:0055085~transmembrane transport	113	4.45408	2.96505e-09	WBGENE00017480, WBGENE00004830, WBGENE00021814, WBGENE00019205, WBGENE00003999, WBGENE00018473, WBGENE00006526, WBGENE00019187, WBGENE00003408, WBGENE00007862, WBGENE00003407, WBGENE00003409, WBGENE00019841, WBGENE00022647, WBGENE00008819, WBGENE00010214, WBGENE00008365, WBGENE00010077, WBGENE00006614, WBGENE00018860, WBGENE00000934, WBGENE00010772, WBGENE00003987, WBGENE00015479, WBGENE00013996,…	1857	413	11627	1.71311	4.8182e-06	1.60607e-06	4.97423e-06
GOTERM_BP_DIRECT	GO:0008152~metabolic process	229	9.02641	4.61125e-07	WBGENE00019477, WBGENE00019479, WBGENE00016620, WBGENE00020366, WBGENE00016716, WBGENE00008567, WBGENE00009812, WBGENE00007177, WBGENE00003408, WBGENE00006527, WBGENE00003407, WBGENE00008564, WBGENE00006529, WBGENE00003409, WBGENE00016150, WBGENE00021709, WBGENE00006424, WBGENE00020831, WBGENE00011725, WBGENE00000298, WBGENE00013119, WBGENE00000107, WBGENE00013852, WBGENE00011362, WBGENE00006712,…	1857	1063	11627	1.34883	0.000749047	0.000187314	0.000773589
GOTERM_BP_DIRECT	GO:0040011~locomotion	285	11.2337	3.69017e-06	WBGENE00006432, WBGENE00003926, WBGENE00002257, WBGENE00019940, WBGENE00003925, WBGENE00008053, WBGENE00006913, WBGENE00044068, WBGENE00006059, WBGENE00022458, WBGENE00006918, WBGENE00006815, WBGENE00019204, WBGENE00003922, WBGENE00006811, WBGENE00006527, WBGENE00003403, WBGENE00001691, WBGENE00000405, WBGENE00000406, WBGENE00006829, WBGENE00007043, WBGENE00006826, WBGENE00010631, WBGENE00000931,…	1857	1405	11627	1.27006	0.00597859	0.00119859	0.00619052
GOTERM_MF_DIRECT	GO:0004871~signal transducer activity	47	1.85258	4.43858e-06	WBGENE00011372, WBGENE00018344, WBGENE00015079, WBGENE00001665, WBGENE00022004, WBGENE00005936, WBGENE00004779, WBGENE00044027, WBGENE00000084, WBGENE00004777, WBGENE00003807, WBGENE00003808, WBGENE00004780, WBGENE00001177, WBGENE00002213, WBGENE00020586, WBGENE00001052, WBGENE00001053, WBGENE00007635, WBGENE00001518, WBGENE00010251, WBGENE00015085, WBGENE00001517, WBGENE00001674, WBGENE00001676,…	1621	141	9479	1.94921	0.00391603	0.00391603	0.00690236
GOTERM_BP_DIRECT	GO:0034220~ion transmembrane transport	47	1.85258	5.49571e-06	WBGENE00020528, WBGENE00001588, WBGENE00020767, WBGENE00006747, WBGENE00006918, WBGENE00020569, WBGENE00013534, WBGENE00009799, WBGENE00000059, WBGENE00001615, WBGENE00006832, WBGENE00022702, WBGENE00003775, WBGENE00000055, WBGENE00008280, WBGENE00000058, WBGENE00003774, WBGENE00013300, WBGENE00001594, WBGENE00021941, WBGENE00001593, WBGENE00013746, WBGENE00007801, WBGENE00006809, WBGENE00017314,…	1857	151	11627	1.94884	0.00889079	0.00148732	0.00921931
GOTERM_CC_DIRECT	GO:0030054~cell junction	48	1.892	6.22587e-06	WBGENE00000156, WBGENE00020528, WBGENE00001588, WBGENE00002142, WBGENE00020767, WBGENE00006747, WBGENE00002999, WBGENE00001281, WBGENE00009799, WBGENE00006750, WBGENE00001615, WBGENE00004719, WBGENE00022702, WBGENE00003775, WBGENE00000055, WBGENE00008280, WBGENE00000058, WBGENE00001177, WBGENE00002136, WBGENE00004921, WBGENE00002135, WBGENE00001594, WBGENE00001593, WBGENE00013746, WBGENE00006363,…	1769	160	11373	1.92872	0.00275427	0.000918934	0.00881248
GOTERM_BP_DIRECT	GO:0006351~transcription, DNA-templated	132	5.203	8.28237e-06	WBGENE00020460, WBGENE00016091, WBGENE00017683, WBGENE00008053, WBGENE00003691, WBGENE00003607, WBGENE00008221, WBGENE00020153, WBGENE00003686, WBGENE00020152, WBGENE00013680, WBGENE00000369, WBGENE00006424, WBGENE00000366, WBGENE00019380, WBGENE00003615, WBGENE00011520, WBGENE00007048, WBGENE00004949, WBGENE00008830, WBGENE00020902, WBGENE00003182, WBGENE00011814, WBGENE00004745, WBGENE00016140,…	1857	576	11627	1.43485	0.0133687	0.00192085	0.0138938
GOTERM_MF_DIRECT	GO:0016740~transferase activity	190	7.48916	1.08665e-05	WBGENE00015099, WBGENE00000186, WBGENE00016620, WBGENE00014054, WBGENE00009488, WBGENE00004740, WBGENE00044303, WBGENE00007177, WBGENE00000226, WBGENE00012518, WBGENE00013905, WBGENE00013680, WBGENE00009552, WBGENE00003394, WBGENE00004032, WBGENE00021709, WBGENE00022646, WBGENE00017336, WBGENE00000366, WBGENE00013900, WBGENE00004033, WBGENE00020831, WBGENE00003401, WBGENE00003396, WBGENE00000405,…	1621	836	9479	1.32901	0.00956001	0.00479149	0.0168975
GOTERM_BP_DIRECT	GO:0018991~oviposition	86	3.38983	2.5496e-05	WBGENE00006432, WBGENE00011064, WBGENE00001182, WBGENE00017683, WBGENE00044068, WBGENE00001340, WBGENE00001184, WBGENE00011111, WBGENE00021915, WBGENE00020368, WBGENE00006815, WBGENE00000084, WBGENE00000086, WBGENE00000900, WBGENE00010701, WBGENE00001377, WBGENE00006565, WBGENE00022702, WBGENE00003136, WBGENE00001178, WBGENE00003001, WBGENE00006772, WBGENE00017989, WBGENE00001863, WBGENE00000148,…	1857	349	11627	1.54287	0.040585	0.00516556	0.0427641
GOTERM_BP_DIRECT	GO:0040026~positive regulation of vulval development	26	1.02483	4.27129e-05	WBGENE00003623, WBGENE00045419, WBGENE00003019, WBGENE00002999, WBGENE00003017, WBGENE00004698, WBGENE00003015, WBGENE00000393, WBGENE00003024, WBGENE00001653, WBGENE00002335, WBGENE00003239, WBGENE00009551, WBGENE00019128, WBGENE00003001, WBGENE00022861, WBGENE00002245, WBGENE00001330, WBGENE00004214, WBGENE00001983, WBGENE00004746, WBGENE00000238, WBGENE00003012, WBGENE00002169, WBGENE00003681,…	1857	70	11627	2.32558	0.0670559	0.00768255	0.0716319
GOTERM_CC_DIRECT	GO:0005783~endoplasmic reticulum	60	2.365	5.02694e-05	WBGENE00018872, WBGENE00011739, WBGENE00000182, WBGENE00008774, WBGENE00011681, WBGENE00008775, WBGENE00004681, WBGENE00003394, WBGENE00000266, WBGENE00020115, WBGENE00001479, WBGENE00021883, WBGENE00020216, WBGENE00017012, WBGENE00000472, WBGENE00010097, WBGENE00001476, WBGENE00006772, WBGENE00021844, WBGENE00007102, WBGENE00016631, WBGENE00008528, WBGENE00017063, WBGENE00014001, WBGENE00011106,…	1769	231	11373	1.66988	0.0220237	0.005552	0.0711337
GOTERM_CC_DIRECT	GO:0005794~Golgi apparatus	43	1.69492	5.5683e-05	WBGENE00000270, WBGENE00018365, WBGENE00006934, WBGENE00001505, WBGENE00000182, WBGENE00002220, WBGENE00008136, WBGENE00000585, WBGENE00016380, WBGENE00002999, WBGENE00007059, WBGENE00001635, WBGENE00018827, WBGENE00001631, WBGENE00011775, WBGENE00006402, WBGENE00001638, WBGENE00007096, WBGENE00017653, WBGENE00006829, WBGENE00008785, WBGENE00004270, WBGENE00004273, WBGENE00004274, WBGENE00008685,…	1769	149	11373	1.85537	0.0243665	0.0049215	0.0787914
GOTERM_CC_DIRECT	GO:0030424~axon	41	1.61608	7.09786e-05	WBGENE00004831, WBGENE00001165, WBGENE00002043, WBGENE00022271, WBGENE00001665, WBGENE00006744, WBGENE00003807, WBGENE00004265, WBGENE00006811, WBGENE00006750, WBGENE00006831, WBGENE00004719, WBGENE00006527, WBGENE00006654, WBGENE00003136, WBGENE00001177, WBGENE00001178, WBGENE00004057, WBGENE00001475, WBGENE00003859, WBGENE00006809, WBGENE00006757, WBGENE00006364, WBGENE00006755, WBGENE00003969,…	1769	141	11373	1.86944	0.0309554	0.00522706	0.100425
GOTERM_BP_DIRECT	GO:0007638~mechanosensory behavior	16	0.630666	0.000141183	WBGENE00006468, WBGENE00001674, WBGENE00004270, WBGENE00003167, WBGENE00003166, WBGENE00003165, WBGENE00003173, WBGENE00003172, WBGENE00004927, WBGENE00002242, WBGENE00003403, WBGENE00021334, WBGENE00004378, WBGENE00003001, WBGENE00001052, WBGENE00013746	1857	35	11627	2.86225	0.20502	0.0226826	0.236588
GOTERM_BP_DIRECT	GO:0006355~regulation of transcription, DNA-templated	159	6.26724	0.000143258	WBGENE00020460, WBGENE00016091, WBGENE00017683, WBGENE00008053, WBGENE00020368, WBGENE00003691, WBGENE00003607, WBGENE00003826, WBGENE00018520, WBGENE00000222, WBGENE00008221, WBGENE00020153, WBGENE00003686, WBGENE00020152, WBGENE00000369, WBGENE00006424, WBGENE00000366, WBGENE00003615, WBGENE00011520, WBGENE00007048, WBGENE00004949, WBGENE00008830, WBGENE00006380, WBGENE00020902, WBGENE00003791,…	1857	758	11627	1.31336	0.207696	0.0209422	0.240061
GOTERM_BP_DIRECT	GO:0043401~steroid hormone mediated signaling pathway	69	2.71975	0.000195203	WBGENE00020460, WBGENE00016091, WBGENE00012446, WBGENE00018189, WBGENE00003646, WBGENE00003648, WBGENE00003647, WBGENE00003691, WBGENE00003641, WBGENE00003607, WBGENE00008221, WBGENE00018622, WBGENE00020153, WBGENE00003686, WBGENE00000908, WBGENE00020152, WBGENE00022805, WBGENE00018415, WBGENE00003615, WBGENE00011520, WBGENE00008830, WBGENE00003656, WBGENE00003655, WBGENE00004786, WBGENE00003653,…	1857	281	11627	1.53744	0.271841	0.02609	0.326973
GOTERM_BP_DIRECT	GO:0016310~phosphorylation	82	3.23216	0.000200056	WBGENE00005078, WBGENE00007812, WBGENE00000186, WBGENE00019428, WBGENE00001184, WBGENE00005077, WBGENE00020185, WBGENE00004740, WBGENE00018569, WBGENE00000900, WBGENE00004879, WBGENE00012019, WBGENE00010115, WBGENE00006524, WBGENE00000226, WBGENE00002211, WBGENE00009552, WBGENE00004032, WBGENE00016352, WBGENE00004033, WBGENE00003396, WBGENE00003401, WBGENE00000405, WBGENE00020398, WBGENE00000406,…	1857	348	11627	1.47533	0.277561	0.0246993	0.335088
GOTERM_MF_DIRECT	GO:0005216~ion channel activity	29	1.14308	0.000211611	WBGENE00004830, WBGENE00006832, WBGENE00006526, WBGENE00003775, WBGENE00007862, WBGENE00000055, WBGENE00000058, WBGENE00003774, WBGENE00002242, WBGENE00008819, WBGENE00012967, WBGENE00007801, WBGENE00006809, WBGENE00006614, WBGENE00003558, WBGENE00006801, WBGENE00000045, WBGENE00000048, WBGENE00000952, WBGENE00004793, WBGENE00006742, WBGENE00014261, WBGENE00000054, WBGENE00003841, WBGENE00000053,…	1621	84	9479	2.01882	0.170626	0.0604566	0.328577
GOTERM_BP_DIRECT	GO:0007165~signal transduction	95	3.74458	0.000283051	WBGENE00018344, WBGENE00018756, WBGENE00022004, WBGENE00015975, WBGENE00016911, WBGENE00004779, WBGENE00044027, WBGENE00020569, WBGENE00000084, WBGENE00004777, WBGENE00013534, WBGENE00011437, WBGENE00004780, WBGENE00022389, WBGENE00020114, WBGENE00001177, WBGENE00022800, WBGENE00013300, WBGENE00019935, WBGENE00001516, WBGENE00011995, WBGENE00001518, WBGENE00007635, WBGENE00001517, WBGENE00001519,…	1857	420	11627	1.41622	0.36873	0.0323248	0.473793
GOTERM_BP_DIRECT	GO:0040025~vulval development	35	1.37958	0.00034554	WBGENE00003926, WBGENE00000156, WBGENE00000411, WBGENE00001182, WBGENE00003123, WBGENE00006815, WBGENE00003017, WBGENE00003014, WBGENE00003015, WBGENE00004310, WBGENE00004117, WBGENE00022702, WBGENE00015547, WBGENE00008520, WBGENE00003001, WBGENE00003002, WBGENE00003401, WBGENE00001824, WBGENE00002245, WBGENE00000858, WBGENE00006829, WBGENE00000872, WBGENE00003150, WBGENE00005019, WBGENE00001949,…	1857	119	11627	1.84152	0.429704	0.0367477	0.578107
GOTERM_BP_DIRECT	GO:0034765~regulation of ion transmembrane transport	12	0.473	0.000346915	WBGENE00006809, WBGENE00004793, WBGENE00004830, WBGENE00006742, WBGENE00002151, WBGENE00014261, WBGENE00007862, WBGENE00003558, WBGENE00002242, WBGENE00008819, WBGENE00006772, WBGENE00012967	1857	23	11627	3.2667	0.430977	0.0346259	0.580401
GOTERM_MF_DIRECT	GO:0022857~transmembrane transporter activity	35	1.37958	0.000360069	WBGENE00017798, WBGENE00011717, WBGENE00011719, WBGENE00017382, WBGENE00019655, WBGENE00011556, WBGENE00013083, WBGENE00018473, WBGENE00019187, WBGENE00008084, WBGENE00022647, WBGENE00020584, WBGENE00020583, WBGENE00012536, WBGENE00008365, WBGENE00021158, WBGENE00022348, WBGENE00018860, WBGENE00006220, WBGENE00015088, WBGENE00010772, WBGENE00003987, WBGENE00008923, WBGENE00003843, WBGENE00020906,…	1621	112	9479	1.82738	0.272658	0.0765046	0.55849
GOTERM_BP_DIRECT	GO:0008340~determination of adult lifespan	195	7.68624	0.000390067	WBGENE00003926, WBGENE00002258, WBGENE00002257, WBGENE00002256, WBGENE00002255, WBGENE00007586, WBGENE00016620, WBGENE00015147, WBGENE00006815, WBGENE00010310, WBGENE00003922, WBGENE00003920, WBGENE00011884, WBGENE00010419, WBGENE00003826, WBGENE00010115, WBGENE00016716, WBGENE00013308, WBGENE00006526, WBGENE00006527, WBGENE00000539, WBGENE00003401, WBGENE00006713, WBGENE00000009, WBGENE00000106,…	1857	976	11627	1.25095	0.469525	0.0366063	0.652375
GOTERM_BP_DIRECT	GO:0007275~multicellular organism development	92	3.62633	0.000397721	WBGENE00006766, WBGENE00004367, WBGENE00000436, WBGENE00000434, WBGENE00006815, WBGENE00010497, WBGENE00000900, WBGENE00001281, WBGENE00004782, WBGENE00003136, WBGENE00000908, WBGENE00003238, WBGENE00013147, WBGENE00003393, WBGENE00003394, WBGENE00001691, WBGENE00003001, WBGENE00006773, WBGENE00003002, WBGENE00003396, WBGENE00000441, WBGENE00000149, WBGENE00006920, WBGENE00001824, WBGENE00000143,…	1857	408	11627	1.41183	0.476084	0.0352753	0.665135
GOTERM_CC_DIRECT	GO:0005797~Golgi medial cisterna	8	0.315333	0.000401169	WBGENE00008018, WBGENE00017273, WBGENE00022721, WBGENE00004273, WBGENE00001638, WBGENE00007059, WBGENE00001844, WBGENE00001637	1769	11	11373	4.67568	0.162851	0.0250737	0.566366
GOTERM_BP_DIRECT	GO:0043051~regulation of pharyngeal pumping	16	0.630666	0.00041844	WBGENE00004015, WBGENE00001519, WBGENE00004014, WBGENE00006747, WBGENE00018334, WBGENE00004267, WBGENE00006750, WBGENE00006843, WBGENE00000232, WBGENE00000233, WBGENE00000908, WBGENE00001177, WBGENE00004921, WBGENE00002148, WBGENE00001680, WBGENE00003730	1857	38	11627	2.63628	0.493437	0.035162	0.69967
GOTERM_MF_DIRECT	GO:0016887~ATPase activity	32	1.26133	0.000430656	WBGENE00018898, WBGENE00008053, WBGENE00016973, WBGENE00004501, WBGENE00004003, WBGENE00016380, WBGENE00008694, WBGENE00003999, WBGENE00022010, WBGENE00003408, WBGENE00003407, WBGENE00003409, WBGENE00003373, WBGENE00001814, WBGENE00001816, WBGENE00000477, WBGENE00004059, WBGENE00007513, WBGENE00003818, WBGENE00015479, WBGENE00022281, WBGENE00013541, WBGENE00002007, WBGENE00004064, WBGENE00006512,…	1621	100	9479	1.87124	0.316673	0.0733288	0.667633
GOTERM_BP_DIRECT	GO:0030421~defecation	19	0.748916	0.000439498	WBGENE00002239, WBGENE00004015, WBGENE00006755, WBGENE00004014, WBGENE00001330, WBGENE00000084, WBGENE00000086, WBGENE00001844, WBGENE00006750, WBGENE00001395, WBGENE00006831, WBGENE00004754, WBGENE00003030, WBGENE00001468, WBGENE00004921, WBGENE00002148, WBGENE00000229, WBGENE00002988, WBGENE00003401	1857	50	11627	2.37925	0.510485	0.0350867	0.73476
GOTERM_BP_DIRECT	GO:0015991~ATP hydrolysis coupled proton transport	12	0.473	0.000548633	WBGENE00022336, WBGENE00013025, WBGENE00006920, WBGENE00006910, WBGENE00006768, WBGENE00006913, WBGENE00016258, WBGENE00001137, WBGENE00006916, WBGENE00006918, WBGENE00000229, WBGENE00010419	1857	24	11627	3.13059	0.590072	0.0415764	0.916425
GOTERM_BP_DIRECT	GO:0071805~potassium ion transmembrane transport	26	1.02483	0.000585682	WBGENE00004830, WBGENE00004831, WBGENE00006685, WBGENE00019205, WBGENE00006687, WBGENE00006680, WBGENE00006667, WBGENE00006668, WBGENE00006682, WBGENE00006669, WBGENE00006676, WBGENE00006526, WBGENE00006678, WBGENE00007862, WBGENE00006677, WBGENE00006671, WBGENE00006679, WBGENE00002242, WBGENE00008819, WBGENE00012967, WBGENE00006696, WBGENE00006658, WBGENE00006691, WBGENE00004793, WBGENE00014261,…	1857	81	11627	2.00976	0.614037	0.0423504	0.978026
GOTERM_MF_DIRECT	GO:0005267~potassium channel activity	22	0.867166	0.000611656	WBGENE00004830, WBGENE00006685, WBGENE00006696, WBGENE00006687, WBGENE00006680, WBGENE00006667, WBGENE00006658, WBGENE00006668, WBGENE00006682, WBGENE00006691, WBGENE00006669, WBGENE00004793, WBGENE00006676, WBGENE00006678, WBGENE00007862, WBGENE00006677, WBGENE00014261, WBGENE00006671, WBGENE00006679, WBGENE00002242, WBGENE00008819, WBGENE00012967	1621	60	9479	2.14413	0.417758	0.0862012	0.946985
GOTERM_MF_DIRECT	GO:0005244~voltage-gated ion channel activity	12	0.473	0.000635905	WBGENE00006809, WBGENE00004793, WBGENE00004830, WBGENE00006742, WBGENE00002151, WBGENE00014261, WBGENE00007862, WBGENE00003558, WBGENE00002242, WBGENE00008819, WBGENE00006772, WBGENE00012967	1621	23	9479	3.05093	0.430114	0.0771894	0.984354
GOTERM_MF_DIRECT	GO:0046872~metal ion binding	300	11.825	0.000700256	WBGENE00020460, WBGENE00015099, WBGENE00016620, WBGENE00044068, WBGENE00003607, WBGENE00011884, WBGENE00011328, WBGENE00009812, WBGENE00016407, WBGENE00016154, WBGENE00006424, WBGENE00020831, WBGENE00003401, WBGENE00003615, WBGENE00011995, WBGENE00000406, WBGENE00000298, WBGENE00007048, WBGENE00011729, WBGENE00000934, WBGENE00016631, WBGENE00006826, WBGENE00008830, WBGENE00020902, WBGENE00009006,…	1621	1492	9479	1.1758	0.461648	0.0744854	1.08346
GOTERM_BP_DIRECT	GO:0006886~intracellular protein transport	28	1.10367	0.000717359	WBGENE00008018, WBGENE00015410, WBGENE00006933, WBGENE00000159, WBGENE00000182, WBGENE00004302, WBGENE00018639, WBGENE00006750, WBGENE00004754, WBGENE00004756, WBGENE00011775, WBGENE00016352, WBGENE00021883, WBGENE00000164, WBGENE00000161, WBGENE00019915, WBGENE00000166, WBGENE00015561, WBGENE00012124, WBGENE00002075, WBGENE00006829, WBGENE00004316, WBGENE00022119, WBGENE00001844, WBGENE00008927,…	1857	91	11627	1.92652	0.688428	0.0494373	1.19667
GOTERM_BP_DIRECT	GO:0040018~positive regulation of multicellular organism growth	81	3.19275	0.000753507	WBGENE00002067, WBGENE00044068, WBGENE00007684, WBGENE00045419, WBGENE00022004, WBGENE00020784, WBGENE00000083, WBGENE00016282, WBGENE00011884, WBGENE00000900, WBGENE00004735, WBGENE00006527, WBGENE00001691, WBGENE00010097, WBGENE00011348, WBGENE00008520, WBGENE00018151, WBGENE00000149, WBGENE00006920, WBGENE00004015, WBGENE00015580, WBGENE00007103, WBGENE00004273, WBGENE00010034, WBGENE00009661,…	1857	357	11627	1.4206	0.706216	0.0497573	1.25661
GOTERM_BP_DIRECT	GO:0040017~positive regulation of locomotion	16	0.630666	0.000793576	WBGENE00006809, WBGENE00001115, WBGENE00005077, WBGENE00006776, WBGENE00003558, WBGENE00006777, WBGENE00004952, WBGENE00006062, WBGENE00004316, WBGENE00006745, WBGENE00006811, WBGENE00001328, WBGENE00004140, WBGENE00000068, WBGENE00001177, WBGENE00006772	1857	40	11627	2.50447	0.724749	0.0502941	1.32302
GOTERM_MF_DIRECT	GO:0005515~protein binding	204	8.04099	0.000810537	WBGENE00003926, WBGENE00002258, WBGENE00008053, WBGENE00003925, WBGENE00044068, WBGENE00006815, WBGENE00003922, WBGENE00003923, WBGENE00003920, WBGENE00003826, WBGENE00006527, WBGENE00022848, WBGENE00003239, WBGENE00009552, WBGENE00003403, WBGENE00003401, WBGENE00003936, WBGENE00002073, WBGENE00000298, WBGENE00006713, WBGENE00006826, WBGENE00007428, WBGENE00000102, WBGENE00008140, WBGENE00000403,…	1621	975	9479	1.2235	0.51169	0.0765559	1.25309
GOTERM_MF_DIRECT	GO:0005230~extracellular ligand-gated ion channel activity	32	1.26133	0.000903326	WBGENE00020528, WBGENE00001588, WBGENE00020767, WBGENE00020569, WBGENE00013534, WBGENE00009799, WBGENE00000059, WBGENE00000055, WBGENE00000058, WBGENE00008280, WBGENE00013300, WBGENE00001594, WBGENE00021941, WBGENE00001593, WBGENE00013746, WBGENE00008997, WBGENE00017314, WBGENE00012915, WBGENE00020657, WBGENE00012099, WBGENE00000045, WBGENE00000048, WBGENE00000951, WBGENE00000232, WBGENE00000233,…	1621	104	9479	1.79927	0.550177	0.0767822	1.3956
GOTERM_BP_DIRECT	GO:0007271~synaptic transmission, cholinergic	24	0.945999	0.0010535	WBGENE00006757, WBGENE00001518, WBGENE00001517, WBGENE00001115, WBGENE00006768, WBGENE00001137, WBGENE00000045, WBGENE00000048, WBGENE00020569, WBGENE00000951, WBGENE00004267, WBGENE00013534, WBGENE00006750, WBGENE00000059, WBGENE00006831, WBGENE00000055, WBGENE00000054, WBGENE00000058, WBGENE00000053, WBGENE00015412, WBGENE00013300, WBGENE00004364, WBGENE00017580, WBGENE00008997	1857	75	11627	2.00358	0.819648	0.0637555	1.75277
GOTERM_BP_DIRECT	GO:1902476~chloride transmembrane transport	25	0.985416	0.00116783	WBGENE00020528, WBGENE00013921, WBGENE00001588, WBGENE00020767, WBGENE00019205, WBGENE00009323, WBGENE00014989, WBGENE00017464, WBGENE00009799, WBGENE00008280, WBGENE00001594, WBGENE00001593, WBGENE00013746, WBGENE00017314, WBGENE00020657, WBGENE00012099, WBGENE00000934, WBGENE00007808, WBGENE00019844, WBGENE00000232, WBGENE00000233, WBGENE00012259, WBGENE00003386, WBGENE00006784, WBGENE00015288	1857	80	11627	1.95662	0.850258	0.0679114	1.94124
GOTERM_BP_DIRECT	GO:0010171~body morphogenesis	127	5.00591	0.00140911	WBGENE00001134, WBGENE00001340, WBGENE00001137, WBGENE00000083, WBGENE00003607, WBGENE00004735, WBGENE00008361, WBGENE00003176, WBGENE00000369, WBGENE00015813, WBGENE00004015, WBGENE00000406, WBGENE00011729, WBGENE00004949, WBGENE00018723, WBGENE00006826, WBGENE00000931, WBGENE00021095, WBGENE00001328, WBGENE00011814, WBGENE00007433, WBGENE00004746, WBGENE00000548, WBGENE00020166, WBGENE00008338,…	1857	616	11627	1.29086	0.898878	0.0785775	2.33786
GOTERM_BP_DIRECT	GO:0001708~cell fate specification	18	0.709499	0.00168867	WBGENE00000156, WBGENE00002239, WBGENE00001182, WBGENE00002245, WBGENE00001949, WBGENE00000075, WBGENE00001194, WBGENE00003920, WBGENE00003014, WBGENE00017895, WBGENE00004117, WBGENE00003030, WBGENE00000238, WBGENE00004769, WBGENE00003001, WBGENE00001324, WBGENE00001325, WBGENE00003106	1857	51	11627	2.20983	0.935843	0.0903578	2.79553
GOTERM_BP_DIRECT	GO:0040039~inductive cell migration	38	1.49783	0.0017318	WBGENE00002045, WBGENE00018898, WBGENE00006768, WBGENE00006605, WBGENE00003623, WBGENE00005077, WBGENE00003367, WBGENE00000585, WBGENE00000064, WBGENE00000065, WBGENE00000419, WBGENE00006745, WBGENE00044321, WBGENE00019168, WBGENE00006529, WBGENE00003239, WBGENE00000229, WBGENE00000366, WBGENE00006974, WBGENE00011143, WBGENE00000143, WBGENE00001949, WBGENE00000870, WBGENE00003792, WBGENE00006870,…	1857	144	11627	1.65225	0.940192	0.0896146	2.86595
GOTERM_BP_DIRECT	GO:0015031~protein transport	37	1.45842	0.00195502	WBGENE00000156, WBGENE00006934, WBGENE00006933, WBGENE00000182, WBGENE00000159, WBGENE00000585, WBGENE00007059, WBGENE00004267, WBGENE00016244, WBGENE00004302, WBGENE00004753, WBGENE00004754, WBGENE00004756, WBGENE00011775, WBGENE00003876, WBGENE00000164, WBGENE00000161, WBGENE00006757, WBGENE00002073, WBGENE00006829, WBGENE00004270, WBGENE00016376, WBGENE00004274, WBGENE00008685, WBGENE00015519,…	1857	140	11627	1.65474	0.958415	0.0974951	3.22969
GOTERM_CC_DIRECT	GO:0000139~Golgi membrane	29	1.14308	0.00196226	WBGENE00000270, WBGENE00001505, WBGENE00000585, WBGENE00016380, WBGENE00013985, WBGENE00001635, WBGENE00018827, WBGENE00001631, WBGENE00011775, WBGENE00022721, WBGENE00018594, WBGENE00001638, WBGENE00007096, WBGENE00017653, WBGENE00008785, WBGENE00004274, WBGENE00019317, WBGENE00022119, WBGENE00044630, WBGENE00008411, WBGENE00004063, WBGENE00002029, WBGENE00004769, WBGENE00017273, WBGENE00008237,…	1769	104	11373	1.79272	0.581104	0.10306	2.74204
GOTERM_BP_DIRECT	GO:0006821~chloride transport	21	0.827749	0.00208352	WBGENE00017314, WBGENE00012099, WBGENE00020657, WBGENE00020528, WBGENE00013921, WBGENE00000934, WBGENE00001588, WBGENE00020767, WBGENE00019205, WBGENE00009323, WBGENE00009799, WBGENE00000232, WBGENE00008280, WBGENE00000233, WBGENE00003386, WBGENE00006784, WBGENE00000528, WBGENE00001594, WBGENE00000529, WBGENE00001593, WBGENE00013746	1857	65	11627	2.02284	0.966266	0.100498	3.4385
GOTERM_CC_DIRECT	GO:0008076~voltage-gated potassium channel complex	9	0.35475	0.00218294	WBGENE00004793, WBGENE00004830, WBGENE00004831, WBGENE00014261, WBGENE00007862, WBGENE00002242, WBGENE00003403, WBGENE00008819, WBGENE00012967	1769	17	11373	3.40362	0.620196	0.101983	3.04602
GOTERM_BP_DIRECT	GO:0003333~amino acid transmembrane transport	12	0.473	0.00254809	WBGENE00017663, WBGENE00000003, WBGENE00012529, WBGENE00000005, WBGENE00010421, WBGENE00000225, WBGENE00008774, WBGENE00000009, WBGENE00012487, WBGENE00016628, WBGENE00019837, WBGENE00012804	1857	28	11627	2.68336	0.984171	0.118062	4.18987
GOTERM_BP_DIRECT	GO:0033564~anterior/posterior axon guidance	5	0.197083	0.00282495	WBGENE00000858, WBGENE00003136, WBGENE00002243, WBGENE00001475, WBGENE00003006	1857	5	11627	6.26117	0.989918	0.126465	4.63504
GOTERM_MF_DIRECT	GO:0043565~sequence-specific DNA binding	102	4.0205	0.00328054	WBGENE00020460, WBGENE00016091, WBGENE00020368, WBGENE00003691, WBGENE00003607, WBGENE00044508, WBGENE00000222, WBGENE00008221, WBGENE00020153, WBGENE00003686, WBGENE00020152, WBGENE00020251, WBGENE00003615, WBGENE00011520, WBGENE00008830, WBGENE00006380, WBGENE00003182, WBGENE00004745, WBGENE00001560, WBGENE00022278, WBGENE00003699, WBGENE00011097, WBGENE00017961, WBGENE00003620, WBGENE00003622,…	1621	459	9479	1.29947	0.945238	0.23208	4.9817
GOTERM_CC_DIRECT	GO:0000138~Golgi trans cisterna	6	0.2365	0.00334704	WBGENE00008018, WBGENE00004270, WBGENE00020572, WBGENE00002999, WBGENE00007059, WBGENE00001844	1769	8	11373	4.82179	0.773549	0.138019	4.63489
GOTERM_BP_DIRECT	GO:0045138~nematode male tail tip morphogenesis	23	0.906583	0.00360862	WBGENE00001165, WBGENE00004048, WBGENE00006776, WBGENE00001949, WBGENE00004858, WBGENE00003029, WBGENE00008684, WBGENE00001194, WBGENE00006870, WBGENE00013352, WBGENE00003006, WBGENE00006745, WBGENE00004301, WBGENE00004216, WBGENE00003779, WBGENE00004117, WBGENE00001088, WBGENE00004860, WBGENE00003239, WBGENE00021834, WBGENE00001324, WBGENE00003106, WBGENE00001325	1857	77	11627	1.87022	0.99719	0.154516	5.88459
GOTERM_CC_DIRECT	GO:0031410~cytoplasmic vesicle	18	0.709499	0.00385511	WBGENE00008052, WBGENE00000149, WBGENE00006829, WBGENE00018512, WBGENE00004274, WBGENE00004214, WBGENE00000415, WBGENE00008927, WBGENE00011775, WBGENE00007529, WBGENE00009552, WBGENE00004921, WBGENE00002084, WBGENE00006783, WBGENE00006477, WBGENE00006782, WBGENE00001130, WBGENE00000567	1769	56	11373	2.06648	0.819335	0.144061	5.32074
GOTERM_BP_DIRECT	GO:0008406~gonad development	75	2.95625	0.00390873	WBGENE00018898, WBGENE00015099, WBGENE00017683, WBGENE00008053, WBGENE00022458, WBGENE00010044, WBGENE00001281, WBGENE00011944, WBGENE00010609, WBGENE00006529, WBGENE00000229, WBGENE00021844, WBGENE00001863, WBGENE00000405, WBGENE00004015, WBGENE00000005, WBGENE00004949, WBGENE00011729, WBGENE00004270, WBGENE00000870, WBGENE00000774, WBGENE00011722, WBGENE00018625, WBGENE00001328, WBGENE00001423,…	1857	345	11627	1.36112	0.998278	0.162037	6.35903
GOTERM_MF_DIRECT	GO:0016787~hydrolase activity	164	6.46433	0.00467799	WBGENE00003926, WBGENE00019477, WBGENE00015802, WBGENE00003925, WBGENE00019479, WBGENE00008053, WBGENE00007755, WBGENE00017686, WBGENE00001137, WBGENE00000080, WBGENE00010502, WBGENE00008775, WBGENE00020784, WBGENE00003922, WBGENE00003923, WBGENE00020662, WBGENE00022010, WBGENE00010702, WBGENE00006527, WBGENE00000369, WBGENE00017678, WBGENE00003393, WBGENE00000229, WBGENE00011725, WBGENE00008043,…	1621	793	9479	1.20934	0.984157	0.292077	7.03245
GOTERM_MF_DIRECT	GO:0016757~transferase activity, transferring glycosyl groups	41	1.61608	0.0047796	WBGENE00000270, WBGENE00001505, WBGENE00015522, WBGENE00019693, WBGENE00015141, WBGENE00020683, WBGENE00015861, WBGENE00001635, WBGENE00007885, WBGENE00006566, WBGENE00010386, WBGENE00001631, WBGENE00013905, WBGENE00006402, WBGENE00021709, WBGENE00007464, WBGENE00001638, WBGENE00013900, WBGENE00001637, WBGENE00007096, WBGENE00017653, WBGENE00019763, WBGENE00007650, WBGENE00018604, WBGENE00044058,…	1621	157	9479	1.52709	0.985524	0.278045	7.17993
GOTERM_BP_DIRECT	GO:0006486~protein glycosylation	22	0.867166	0.00480075	WBGENE00007096, WBGENE00017653, WBGENE00000270, WBGENE00018604, WBGENE00001505, WBGENE00007102, WBGENE00008785, WBGENE00019693, WBGENE00020683, WBGENE00044630, WBGENE00001635, WBGENE00015793, WBGENE00008019, WBGENE00020222, WBGENE00001631, WBGENE00020437, WBGENE00006402, WBGENE00007464, WBGENE00001638, WBGENE00010757, WBGENE00001628, WBGENE00001637	1857	74	11627	1.86143	0.999598	0.190511	7.75594
GOTERM_MF_DIRECT	GO:0015078~hydrogen ion transmembrane transporter activity	10	0.394166	0.00499824	WBGENE00011015, WBGENE00022336, WBGENE00006920, WBGENE00006910, WBGENE00006768, WBGENE00006913, WBGENE00016258, WBGENE00006916, WBGENE00000209, WBGENE00000206	1621	21	9479	2.78458	0.98808	0.271228	7.49655
GOTERM_MF_DIRECT	GO:0005275~amine transmembrane transporter activity	6	0.2365	0.0051418	WBGENE00013083, WBGENE00008084, WBGENE00006220, WBGENE00003842, WBGENE00000934, WBGENE00010772	1621	8	9479	4.38572	0.989507	0.261995	7.70388
GOTERM_BP_DIRECT	GO:0000003~reproduction	393	15.4907	0.00531828	WBGENE00003926, WBGENE00015099, WBGENE00003925, WBGENE00009052, WBGENE00012062, WBGENE00003922, WBGENE00003920, WBGENE00003826, WBGENE00010701, WBGENE00003238, WBGENE00010847, WBGENE00019380, WBGENE00015580, WBGENE00008429, WBGENE00011729, WBGENE00002075, WBGENE00010631, WBGENE00011722, WBGENE00006307, WBGENE00015162, WBGENE00003030, WBGENE00003225, WBGENE00016140, WBGENE00002169, WBGENE00018349,…	1857	2205	11627	1.11594	0.999828	0.203902	8.55739
GOTERM_BP_DIRECT	GO:0043652~engulfment of apoptotic cell	25	0.985416	0.00547967	WBGENE00000156, WBGENE00003622, WBGENE00001184, WBGENE00003060, WBGENE00000420, WBGENE00002190, WBGENE00004273, WBGENE00000419, WBGENE00000083, WBGENE00003792, WBGENE00003156, WBGENE00000952, WBGENE00000415, WBGENE00006565, WBGENE00012221, WBGENE00012386, WBGENE00003239, WBGENE00003588, WBGENE00020821, WBGENE00021334, WBGENE00004378, WBGENE00003475, WBGENE00001130, WBGENE00016030, WBGENE00017241	1857	89	11627	1.75876	0.999868	0.20463	8.80598
GOTERM_BP_DIRECT	GO:0030334~regulation of cell migration	19	0.748916	0.00558041	WBGENE00000156, WBGENE00003478, WBGENE00003479, WBGENE00004048, WBGENE00006776, WBGENE00009119, WBGENE00000585, WBGENE00006815, WBGENE00008684, WBGENE00001194, WBGENE00003072, WBGENE00003006, WBGENE00004063, WBGENE00000238, WBGENE00002003, WBGENE00002029, WBGENE00003238, WBGENE00003576, WBGENE00004040	1857	61	11627	1.9502	0.999888	0.203349	8.96083
GOTERM_MF_DIRECT	GO:0008375~acetylglucosaminyltransferase activity	11	0.433583	0.00564223	WBGENE00009148, WBGENE00020503, WBGENE00012135, WBGENE00009263, WBGENE00001643, WBGENE00013119, WBGENE00001644, WBGENE00009447, WBGENE00019270, WBGENE00001638, WBGENE00001637	1621	25	9479	2.57295	0.993275	0.268469	8.42323
GOTERM_CC_DIRECT	GO:0030425~dendrite	22	0.867166	0.00579085	WBGENE00003969, WBGENE00006933, WBGENE00004779, WBGENE00002999, WBGENE00003961, WBGENE00001248, WBGENE00000102, WBGENE00003807, WBGENE00004265, WBGENE00006831, WBGENE00004719, WBGENE00011648, WBGENE00006526, WBGENE00006643, WBGENE00006527, WBGENE00004780, WBGENE00011955, WBGENE00001178, WBGENE00021897, WBGENE00000491, WBGENE00004057, WBGENE00003859	1769	77	11373	1.83687	0.923679	0.192975	7.89204
GOTERM_MF_DIRECT	GO:0003700~transcription factor activity, sequence-specific DNA binding	107	4.21758	0.005922	WBGENE00020460, WBGENE00016091, WBGENE00020368, WBGENE00003691, WBGENE00003607, WBGENE00004735, WBGENE00000222, WBGENE00008221, WBGENE00010704, WBGENE00020153, WBGENE00003686, WBGENE00020152, WBGENE00003615, WBGENE00011520, WBGENE00007048, WBGENE00008830, WBGENE00004745, WBGENE00001560, WBGENE00022278, WBGENE00003699, WBGENE00011097, WBGENE00001324, WBGENE00017961, WBGENE00003620, WBGENE00003622,…	1621	494	9479	1.26659	0.994756	0.265716	8.82312
GOTERM_MF_DIRECT	GO:0016301~kinase activity	76	2.99566	0.00614609	WBGENE00005078, WBGENE00007812, WBGENE00000186, WBGENE00019428, WBGENE00005077, WBGENE00001184, WBGENE00020185, WBGENE00004740, WBGENE00018569, WBGENE00000900, WBGENE00004879, WBGENE00012019, WBGENE00010115, WBGENE00006524, WBGENE00000226, WBGENE00002211, WBGENE00009552, WBGENE00016352, WBGENE00004032, WBGENE00004033, WBGENE00003396, WBGENE00003401, WBGENE00000405, WBGENE00020398, WBGENE00000406,…	1621	334	9479	1.3306	0.995703	0.261233	9.14222
GOTERM_CC_DIRECT	GO:0000502~proteasome complex	13	0.512416	0.00631058	WBGENE00004503, WBGENE00003926, WBGENE00004465, WBGENE00003925, WBGENE00004464, WBGENE00004501, WBGENE00003953, WBGENE00003922, WBGENE00003923, WBGENE00003950, WBGENE00006856, WBGENE00004468, WBGENE00004467	1769	36	11373	2.3216	0.93946	0.194044	8.57128
GOTERM_CC_DIRECT	GO:0043025~neuronal cell body	34	1.34017	0.00643284	WBGENE00001165, WBGENE00006933, WBGENE00001665, WBGENE00005101, WBGENE00002999, WBGENE00003807, WBGENE00004265, WBGENE00006831, WBGENE00006527, WBGENE00000491, WBGENE00004033, WBGENE00013746, WBGENE00007801, WBGENE00000149, WBGENE00006755, WBGENE00003969, WBGENE00004273, WBGENE00001248, WBGENE00000102, WBGENE00003068, WBGENE00000403, WBGENE00020142, WBGENE00000501, WBGENE00004140, WBGENE00011648,…	1769	138	11373	1.58397	0.942671	0.18471	8.73038
GOTERM_MF_DIRECT	GO:0016746~transferase activity, transferring acyl groups	35	1.37958	0.00653821	WBGENE00013450, WBGENE00012948, WBGENE00016620, WBGENE00014054, WBGENE00021394, WBGENE00009488, WBGENE00020911, WBGENE00008676, WBGENE00020549, WBGENE00007177, WBGENE00020115, WBGENE00003394, WBGENE00022646, WBGENE00017261, WBGENE00000366, WBGENE00021059, WBGENE00010892, WBGENE00018211, WBGENE00018708, WBGENE00013852, WBGENE00019849, WBGENE00011106, WBGENE00009082, WBGENE00011850, WBGENE00016773,…	1621	131	9479	1.56234	0.996969	0.263022	9.69809
GOTERM_BP_DIRECT	GO:0006813~potassium ion transport	15	0.59125	0.00671278	WBGENE00004830, WBGENE00004831, WBGENE00002151, WBGENE00001137, WBGENE00019205, WBGENE00006667, WBGENE00004793, WBGENE00006526, WBGENE00007862, WBGENE00014261, WBGENE00002242, WBGENE00008570, WBGENE00008819, WBGENE00010117, WBGENE00012967	1857	44	11627	2.13449	0.999982	0.23429	10.6845
GOTERM_CC_DIRECT	GO:0000228~nuclear chromosome	8	0.315333	0.00679501	WBGENE00001085, WBGENE00004746, WBGENE00004745, WBGENE00000591, WBGENE00003418, WBGENE00003422, WBGENE00011111, WBGENE00003882	1769	16	11373	3.21453	0.951221	0.182385	9.20018
GOTERM_BP_DIRECT	GO:0015992~proton transport	14	0.551833	0.00727769	WBGENE00022336, WBGENE00006920, WBGENE00013025, WBGENE00006768, WBGENE00006910, WBGENE00006916, WBGENE00006918, WBGENE00010419, WBGENE00013073, WBGENE00011273, WBGENE00022721, WBGENE00010811, WBGENE00000229, WBGENE00000209	1857	40	11627	2.19141	0.999993	0.246184	11.5328
GOTERM_BP_DIRECT	GO:0007265~Ras protein signal transduction	6	0.2365	0.00738473	WBGENE00003030, WBGENE00000238, WBGENE00001324, WBGENE00001325, WBGENE00015418, WBGENE00003401	1857	9	11627	4.17412	0.999994	0.244299	11.6927
GOTERM_BP_DIRECT	GO:1903539~protein localization to postsynaptic membrane	5	0.197083	0.00740104	WBGENE00006933, WBGENE00004270, WBGENE00004927, WBGENE00021334, WBGENE00004378	1857	6	11627	5.21764	0.999994	0.239934	11.717
GOTERM_BP_DIRECT	GO:0002119~nematode larval development	356	14.0323	0.00800801	WBGENE00003926, WBGENE00019940, WBGENE00003925, WBGENE00001687, WBGENE00006910, WBGENE00008053, WBGENE00006913, WBGENE00007586, WBGENE00044068, WBGENE00007587, WBGENE00006059, WBGENE00020368, WBGENE00006918, WBGENE00003922, WBGENE00003923, WBGENE00003920, WBGENE00003607, WBGENE00010419, WBGENE00011884, WBGENE00003826, WBGENE00013308, WBGENE00006529, WBGENE00003238, WBGENE00009552, WBGENE00011348,…	1857	1993	11627	1.1184	0.999998	0.251992	12.6183
GOTERM_MF_DIRECT	GO:0005085~guanyl-nucleotide exchange factor activity	12	0.473	0.00807501	WBGENE00004367, WBGENE00001366, WBGENE00004255, WBGENE00004254, WBGENE00012950, WBGENE00014221, WBGENE00017195, WBGENE00019902, WBGENE00000419, WBGENE00000086, WBGENE00018520, WBGENE00021320	1621	30	9479	2.33905	0.999229	0.301181	11.8462
GOTERM_MF_DIRECT	GO:0017137~Rab GTPase binding	13	0.512416	0.00813597	WBGENE00006750, WBGENE00015099, WBGENE00008018, WBGENE00006575, WBGENE00015410, WBGENE00020572, WBGENE00016352, WBGENE00002999, WBGENE00007059, WBGENE00004316, WBGENE00018639, WBGENE00019915, WBGENE00044061	1621	34	9479	2.23586	0.999269	0.290991	11.9304
GOTERM_BP_DIRECT	GO:0040013~negative regulation of locomotion	10	0.394166	0.00881404	WBGENE00011531, WBGENE00020050, WBGENE00006768, WBGENE00000068, WBGENE00002190, WBGENE00020114, WBGENE00006062, WBGENE00004779, WBGENE00006475, WBGENE00001450	1857	24	11627	2.60882	0.999999	0.268564	13.8019
GOTERM_BP_DIRECT	GO:0016055~Wnt signaling pathway	16	0.630666	0.00927182	WBGENE00000156, WBGENE00001101, WBGENE00000858, WBGENE00015324, WBGENE00003029, WBGENE00010497, WBGENE00001194, WBGENE00003006, WBGENE00003048, WBGENE00000238, WBGENE00006561, WBGENE00003238, WBGENE00003394, WBGENE00001324, WBGENE00001325, WBGENE00003396	1857	50	11627	2.00358	1	0.275348	14.4673
GOTERM_CC_DIRECT	GO:0098793~presynapse	10	0.394166	0.00999061	WBGENE00006757, WBGENE00001395, WBGENE00006831, WBGENE00004925, WBGENE00001032, WBGENE00004032, WBGENE00010259, WBGENE00004924, WBGENE00004364, WBGENE00000084	1769	25	11373	2.57162	0.988299	0.242708	13.2492

## Sheet: Cluster 5
Category	Term	Count	%	PValue	Genes	List Total	Pop Hits	Pop Total	Fold Enrichment	Bonferroni	Benjamini	FDR
GOTERM_BP_DIRECT	GO:0009792~embryo development ending in birth or egg hatching	376	20.2695	9.17847e-11	WBGENE00002063, WBGENE00022310, WBGENE00010319, WBGENE00009052, WBGENE00006817, WBGENE00009054, WBGENE00001683, WBGENE00022312, WBGENE00013109, WBGENE00000942, WBGENE00006919, WBGENE00007030, WBGENE00006810, WBGENE00006530, WBGENE00012489, WBGENE00003825, WBGENE00006728, WBGENE00006727, WBGENE00003921, WBGENE00003242, WBGENE00001933, WBGENE00010700, WBGENE00013307, WBGENE00013308, WBGENE00019502,…	1071	3091	11627	1.32059	9.76589e-08	9.76589e-08	1.46164e-07
GOTERM_CC_DIRECT	GO:0005737~cytoplasm	197	10.6199	3.88744e-10	WBGENE00002063, WBGENE00007036, WBGENE00009052, WBGENE00001683, WBGENE00000942, WBGENE00006810, WBGENE00006530, WBGENE00006728, WBGENE00006533, WBGENE00007581, WBGENE00003921, WBGENE00006727, WBGENE00010700, WBGENE00012203, WBGENE00006528, WBGENE00000804, WBGENE00002059, WBGENE00011344, WBGENE00013020, WBGENE00015293, WBGENE00008423, WBGENE00013111, WBGENE00008041, WBGENE00002269, WBGENE00002078,…	973	1518	11373	1.5169	1.39559e-07	1.39559e-07	5.33683e-07
GOTERM_CC_DIRECT	GO:0005840~ribosome	36	1.9407	1.1505e-07	WBGENE00004408, WBGENE00004409, WBGENE00004475, WBGENE00004491, WBGENE00007564, WBGENE00004432, WBGENE00007859, WBGENE00023422, WBGENE00006728, WBGENE00004429, WBGENE00004446, WBGENE00021351, WBGENE00004427, WBGENE00004425, WBGENE00004449, WBGENE00012244, WBGENE00004488, WBGENE00004421, WBGENE00004440, WBGENE00020796, WBGENE00021350, WBGENE00004434, WBGENE00004436, WBGENE00022493, WBGENE00004418,…	973	158	11373	2.66322	4.1302e-05	2.06512e-05	0.000157945
GOTERM_MF_DIRECT	GO:0003735~structural constituent of ribosome	41	2.21024	1.57333e-07	WBGENE00004408, WBGENE00004409, WBGENE00004475, WBGENE00004491, WBGENE00018901, WBGENE00007564, WBGENE00004432, WBGENE00007859, WBGENE00023422, WBGENE00006728, WBGENE00004429, WBGENE00004446, WBGENE00004427, WBGENE00004425, WBGENE00008767, WBGENE00004449, WBGENE00012244, WBGENE00004488, WBGENE00008505, WBGENE00000933, WBGENE00021736, WBGENE00004421, WBGENE00004440, WBGENE00020796, WBGENE00021350,…	895	179	9479	2.42589	9.15638e-05	9.15638e-05	0.0002314
GOTERM_CC_DIRECT	GO:0030529~intracellular ribonucleoprotein complex	34	1.83288	1.59852e-07	WBGENE00004408, WBGENE00004409, WBGENE00004475, WBGENE00004491, WBGENE00017238, WBGENE00004432, WBGENE00007859, WBGENE00006728, WBGENE00004429, WBGENE00004427, WBGENE00004425, WBGENE00004449, WBGENE00006794, WBGENE00004488, WBGENE00003080, WBGENE00007708, WBGENE00018159, WBGENE00004421, WBGENE00004440, WBGENE00021350, WBGENE00004434, WBGENE00004436, WBGENE00022493, WBGENE00004418, WBGENE00004417,…	973	146	11373	2.722	5.73853e-05	1.91288e-05	0.000219451
GOTERM_BP_DIRECT	GO:0000003~reproduction	268	14.4474	2.20374e-07	WBGENE00022310, WBGENE00018874, WBGENE00012351, WBGENE00009052, WBGENE00015098, WBGENE00009054, WBGENE00022312, WBGENE00000942, WBGENE00006919, WBGENE00007030, WBGENE00006810, WBGENE00006530, WBGENE00012489, WBGENE00003825, WBGENE00006728, WBGENE00006727, WBGENE00003921, WBGENE00003242, WBGENE00010700, WBGENE00001933, WBGENE00013308, WBGENE00018472, WBGENE00006528, WBGENE00000536, WBGENE00000804,…	1071	2205	11627	1.31948	0.00023445	0.000117232	0.000350936
GOTERM_BP_DIRECT	GO:0002119~nematode larval development	246	13.2615	2.43706e-07	WBGENE00022310, WBGENE00001683, WBGENE00022312, WBGENE00013109, WBGENE00006919, WBGENE00007030, WBGENE00006810, WBGENE00006530, WBGENE00003825, WBGENE00006728, WBGENE00003242, WBGENE00003921, WBGENE00006727, WBGENE00001933, WBGENE00013308, WBGENE00006528, WBGENE00013406, WBGENE00000933, WBGENE00002078, WBGENE00003025, WBGENE00018660, WBGENE00003931, WBGENE00001929, WBGENE00016142, WBGENE00016621,…	1071	1993	11627	1.34	0.00025927	8.64307e-05	0.000388092
GOTERM_CC_DIRECT	GO:0022625~cytosolic large ribosomal subunit	17	0.916442	6.7289e-06	WBGENE00004408, WBGENE00004409, WBGENE00004432, WBGENE00004421, WBGENE00004440, WBGENE00021350, WBGENE00004434, WBGENE00004446, WBGENE00004427, WBGENE00004436, WBGENE00004418, WBGENE00004417, WBGENE00004425, WBGENE00004412, WBGENE00004449, WBGENE00016493, WBGENE00017347	973	54	11373	3.67974	0.00241277	0.000603738	0.00923731
GOTERM_CC_DIRECT	GO:0055120~striated muscle dense body	23	1.23989	1.01078e-05	WBGENE00011531, WBGENE00008339, WBGENE00008041, WBGENE00000942, WBGENE00017060, WBGENE00003931, WBGENE00008405, WBGENE00009123, WBGENE00022180, WBGENE00001572, WBGENE00000203, WBGENE00017440, WBGENE00010665, WBGENE00010593, WBGENE00006495, WBGENE00008865, WBGENE00000832, WBGENE00011344, WBGENE00013020, WBGENE00007630, WBGENE00016197, WBGENE00001132, WBGENE00044070	973	94	11373	2.85997	0.00362213	0.000725477	0.0138754
GOTERM_BP_DIRECT	GO:0002181~cytoplasmic translation	10	0.539084	4.84663e-05	WBGENE00004408, WBGENE00004434, WBGENE00004409, WBGENE00004427, WBGENE00004418, WBGENE00004417, WBGENE00016493, WBGENE00004440, WBGENE00017347, WBGENE00018932	1071	21	11627	5.16962	0.0502622	0.0128096	0.0771527
GOTERM_MF_DIRECT	GO:0005515~protein binding	128	6.90027	6.26009e-05	WBGENE00000889, WBGENE00022310, WBGENE00016550, WBGENE00010973, WBGENE00016289, WBGENE00000942, WBGENE00022456, WBGENE00015780, WBGENE00001236, WBGENE00015466, WBGENE00018145, WBGENE00003825, WBGENE00003921, WBGENE00000220, WBGENE00015776, WBGENE00021416, WBGENE00010587, WBGENE00000804, WBGENE00011344, WBGENE00002059, WBGENE00002264, WBGENE00006798, WBGENE00018337, WBGENE00013111, WBGENE00002266,…	895	975	9479	1.39042	0.0357791	0.0180525	0.0920318
GOTERM_BP_DIRECT	GO:0006412~translation	44	2.37197	0.000105278	WBGENE00002063, WBGENE00004475, WBGENE00004409, WBGENE00013677, WBGENE00007623, WBGENE00001133, WBGENE00004491, WBGENE00018901, WBGENE00004679, WBGENE00012768, WBGENE00004432, WBGENE00002001, WBGENE00006728, WBGENE00001232, WBGENE00004429, WBGENE00004446, WBGENE00004427, WBGENE00004425, WBGENE00008767, WBGENE00004449, WBGENE00012244, WBGENE00002059, WBGENE00004488, WBGENE00008505, WBGENE00002152,…	1071	260	11627	1.8372	0.105975	0.0221552	0.167519
GOTERM_CC_DIRECT	GO:0005861~troponin complex	6	0.32345	0.000202987	WBGENE00003495, WBGENE00006584, WBGENE00006585, WBGENE00006586, WBGENE00006587, WBGENE00006588	973	8	11373	8.76644	0.0702874	0.0120732	0.278309
GOTERM_MF_DIRECT	GO:0003779~actin binding	18	0.97035	0.000245266	WBGENE00019064, WBGENE00000768, WBGENE00000942, WBGENE00021758, WBGENE00006810, WBGENE00000072, WBGENE00003514, WBGENE00002978, WBGENE00000203, WBGENE00006584, WBGENE00000200, WBGENE00006585, WBGENE00010593, WBGENE00006586, WBGENE00002348, WBGENE00006794, WBGENE00000140, WBGENE00009730	895	71	9479	2.68506	0.13304	0.046473	0.360124
GOTERM_MF_DIRECT	GO:0046982~protein heterodimerization activity	21	1.13208	0.00103845	WBGENE00000423, WBGENE00001876, WBGENE00001940, WBGENE00001943, WBGENE00001942, WBGENE00001893, WBGENE00001884, WBGENE00001885, WBGENE00006395, WBGENE00001887, WBGENE00001831, WBGENE00001909, WBGENE00001878, WBGENE00001906, WBGENE00001933, WBGENE00001916, WBGENE00001911, WBGENE00001929, WBGENE00001914, WBGENE00001931, WBGENE00009584	895	101	9479	2.2021	0.453756	0.140301	1.51649
GOTERM_CC_DIRECT	GO:0005739~mitochondrion	56	3.01887	0.00112324	WBGENE00008415, WBGENE00007237, WBGENE00013094, WBGENE00020089, WBGENE00000787, WBGENE00007859, WBGENE00004930, WBGENE00008117, WBGENE00015776, WBGENE00000041, WBGENE00000536, WBGENE00013492, WBGENE00007630, WBGENE00018763, WBGENE00000877, WBGENE00007993, WBGENE00015159, WBGENE00022582, WBGENE00022380, WBGENE00019544, WBGENE00002025, WBGENE00019274, WBGENE00001425, WBGENE00016142, WBGENE00010809,…	973	424	11373	1.54378	0.332001	0.0560088	1.53105
GOTERM_CC_DIRECT	GO:0030687~preribosome, large subunit precursor	9	0.485175	0.00140786	WBGENE00004408, WBGENE00004409, WBGENE00015811, WBGENE00012351, WBGENE00012978, WBGENE00013735, WBGENE00016493, WBGENE00017347, WBGENE00012739	973	27	11373	3.8962	0.396963	0.0612651	1.91554
GOTERM_BP_DIRECT	GO:0006915~apoptotic process	65	3.50404	0.00141153	WBGENE00000889, WBGENE00004475, WBGENE00011111, WBGENE00004432, WBGENE00000787, WBGENE00019328, WBGENE00006919, WBGENE00017643, WBGENE00006728, WBGENE00006727, WBGENE00001232, WBGENE00020092, WBGENE00004429, WBGENE00015776, WBGENE00004427, WBGENE00004425, WBGENE00006528, WBGENE00016449, WBGENE00021784, WBGENE00000366, WBGENE00001931, WBGENE00002130, WBGENE00002131, WBGENE00001412, WBGENE00000933,…	1071	479	11627	1.47318	0.777523	0.22158	2.22429
GOTERM_CC_DIRECT	GO:0000786~nucleosome	18	0.97035	0.00143241	WBGENE00001876, WBGENE00001940, WBGENE00001943, WBGENE00001942, WBGENE00001893, WBGENE00001884, WBGENE00001885, WBGENE00001887, WBGENE00001831, WBGENE00001909, WBGENE00001878, WBGENE00001906, WBGENE00001933, WBGENE00001916, WBGENE00001911, WBGENE00001929, WBGENE00001914, WBGENE00001931	973	90	11373	2.33772	0.402263	0.0555742	1.94864
GOTERM_BP_DIRECT	GO:0006334~nucleosome assembly	17	0.916442	0.00148462	WBGENE00017075, WBGENE00001876, WBGENE00001940, WBGENE00001943, WBGENE00001884, WBGENE00001885, WBGENE00006817, WBGENE00001887, WBGENE00001831, WBGENE00001878, WBGENE00001906, WBGENE00001933, WBGENE00001916, WBGENE00001911, WBGENE00001929, WBGENE00001914, WBGENE00009277	1071	77	11627	2.39683	0.79419	0.202146	2.33818
GOTERM_MF_DIRECT	GO:0031492~nucleosomal DNA binding	9	0.485175	0.00152537	WBGENE00001876, WBGENE00001933, WBGENE00001906, WBGENE00001916, WBGENE00001943, WBGENE00001929, WBGENE00001887, WBGENE00001914, WBGENE00001831	895	25	9479	3.81278	0.588704	0.162797	2.22016
GOTERM_BP_DIRECT	GO:0040035~hermaphrodite genitalia development	90	4.85175	0.00439002	WBGENE00022310, WBGENE00001402, WBGENE00022881, WBGENE00012351, WBGENE00003596, WBGENE00011432, WBGENE00000181, WBGENE00001974, WBGENE00022312, WBGENE00011111, WBGENE00044645, WBGENE00001831, WBGENE00016509, WBGENE00003825, WBGENE00011116, WBGENE00003242, WBGENE00018472, WBGENE00021681, WBGENE00022219, WBGENE00000041, WBGENE00004882, WBGENE00021512, WBGENE00001590, WBGENE00020112, WBGENE00021784,…	1071	738	11627	1.32393	0.990733	0.442982	6.76652
GOTERM_CC_DIRECT	GO:0005768~endosome	10	0.539084	0.00475726	WBGENE00006833, WBGENE00013354, WBGENE00014234, WBGENE00011216, WBGENE00000843, WBGENE00013598, WBGENE00013167, WBGENE00004274, WBGENE00017974, WBGENE00006503	973	39	11373	2.99707	0.819483	0.157341	6.33686
GOTERM_CC_DIRECT	GO:0000407~pre-autophagosomal structure	5	0.269542	0.00732064	WBGENE00012559, WBGENE00002980, WBGENE00017045, WBGENE00010882, WBGENE00022078	973	10	11373	5.8443	0.92848	0.213213	9.59497
GOTERM_BP_DIRECT	GO:0007218~neuropeptide signaling pathway	17	0.916442	0.00930353	WBGENE00003761, WBGENE00016028, WBGENE00001462, WBGENE00001451, WBGENE00001454, WBGENE00001444, WBGENE00003759, WBGENE00007219, WBGENE00001446, WBGENE00001456, WBGENE00001448, WBGENE00003743, WBGENE00003751, WBGENE00020126, WBGENE00001464, WBGENE00003744, WBGENE00003755	1071	92	11627	2.00604	0.999952	0.6688	13.83
GOTERM_MF_DIRECT	GO:0071855~neuropeptide receptor binding	6	0.32345	0.00991884	WBGENE00001454, WBGENE00001444, WBGENE00001446, WBGENE00001456, WBGENE00003751, WBGENE00001451	895	15	9479	4.23642	0.996977	0.619752	13.637

## Sheet: Cluster 6
Category	Term	Count	%	PValue	Genes	List Total	Pop Hits	Pop Total	Fold Enrichment	Bonferroni	Benjamini	FDR
GOTERM_BP_DIRECT	GO:0006810~transport	82	10.7895	2.27621e-10	WBGENE00006911, WBGENE00000136, WBGENE00004228, WBGENE00007384, WBGENE00004267, WBGENE00010784, WBGENE00007388, WBGENE00018181, WBGENE00019979, WBGENE00011775, WBGENE00006671, WBGENE00013740, WBGENE00001331, WBGENE00000845, WBGENE00019289, WBGENE00010214, WBGENE00001591, WBGENE00006774, WBGENE00003519, WBGENE00013855, WBGENE00006921, WBGENE00006757, WBGENE00006920, WBGENE00011891, WBGENE00019481,…	566	810	11627	2.0796	1.66847e-07	1.66847e-07	3.45384e-07
GOTERM_BP_DIRECT	GO:0008152~metabolic process	94	12.3684	1.02383e-08	WBGENE00013575, WBGENE00007755, WBGENE00011681, WBGENE00009342, WBGENE00019379, WBGENE00006351, WBGENE00016716, WBGENE00007175, WBGENE00008669, WBGENE00004258, WBGENE00013901, WBGENE00008566, WBGENE00018573, WBGENE00001430, WBGENE00007228, WBGENE00007130, WBGENE00014009, WBGENE00000040, WBGENE00010904, WBGENE00021709, WBGENE00044071, WBGENE00008629, WBGENE00016664, WBGENE00016013, WBGENE00018152,…	566	1063	11627	1.81654	7.50468e-06	3.75235e-06	1.55352e-05
GOTERM_BP_DIRECT	GO:0052696~flavonoid glucuronidation	18	2.36842	3.30672e-08	WBGENE00015449, WBGENE00017959, WBGENE00009450, WBGENE00019379, WBGENE00015693, WBGENE00015695, WBGENE00011006, WBGENE00013901, WBGENE00018543, WBGENE00019515, WBGENE00019234, WBGENE00010904, WBGENE00021709, WBGENE00018789, WBGENE00015577, WBGENE00016013, WBGENE00007455, WBGENE00020592	566	71	11627	5.20793	2.4238e-05	8.07939e-06	5.01749e-05
GOTERM_BP_DIRECT	GO:0009813~flavonoid biosynthetic process	18	2.36842	3.30672e-08	WBGENE00015449, WBGENE00017959, WBGENE00009450, WBGENE00019379, WBGENE00015693, WBGENE00015695, WBGENE00011006, WBGENE00013901, WBGENE00018543, WBGENE00019515, WBGENE00019234, WBGENE00010904, WBGENE00021709, WBGENE00018789, WBGENE00015577, WBGENE00016013, WBGENE00007455, WBGENE00020592	566	71	11627	5.20793	2.4238e-05	8.07939e-06	5.01749e-05
GOTERM_BP_DIRECT	GO:0006508~proteolysis	44	5.78947	8.72693e-08	WBGENE00007605, WBGENE00003545, WBGENE00019617, WBGENE00003526, WBGENE00012445, WBGENE00003547, WBGENE00011235, WBGENE00007071, WBGENE00003549, WBGENE00019074, WBGENE00020788, WBGENE00009158, WBGENE00019105, WBGENE00019986, WBGENE00000781, WBGENE00003528, WBGENE00020567, WBGENE00016423, WBGENE00009958, WBGENE00011803, WBGENE00006954, WBGENE00012530, WBGENE00017881, WBGENE00001690, WBGENE00008521,…	566	370	11627	2.44288	6.39664e-05	1.5992e-05	0.000132419
GOTERM_BP_DIRECT	GO:0055085~transmembrane transport	47	6.18421	1.09985e-07	WBGENE00006439, WBGENE00003572, WBGENE00011718, WBGENE00004000, WBGENE00022788, WBGENE00008110, WBGENE00008033, WBGENE00016431, WBGENE00007388, WBGENE00015777, WBGENE00019979, WBGENE00013740, WBGENE00004058, WBGENE00003569, WBGENE00019289, WBGENE00010214, WBGENE00003731, WBGENE00010918, WBGENE00003519, WBGENE00013668, WBGENE00021159, WBGENE00017350, WBGENE00006220, WBGENE00004059, WBGENE00003837,…	566	413	11627	2.33776	8.06157e-05	1.61237e-05	0.000166887
GOTERM_CC_DIRECT	GO:0005886~plasma membrane	58	7.63158	1.42492e-07	WBGENE00007071, WBGENE00006917, WBGENE00000902, WBGENE00004267, WBGENE00013848, WBGENE00000900, WBGENE00003497, WBGENE00011803, WBGENE00019979, WBGENE00004925, WBGENE00006954, WBGENE00004921, WBGENE00008265, WBGENE00000179, WBGENE00006774, WBGENE00001591, WBGENE00001518, WBGENE00001519, WBGENE00000047, WBGENE00002173, WBGENE00020559, WBGENE00019346, WBGENE00001620, WBGENE00010275, WBGENE00004364,…	533	593	11373	2.08699	2.56483e-05	2.56483e-05	0.000175514
GOTERM_MF_DIRECT	GO:0016758~transferase activity, transferring hexosyl groups	18	2.36842	7.10785e-07	WBGENE00015449, WBGENE00017959, WBGENE00009450, WBGENE00019379, WBGENE00015693, WBGENE00015695, WBGENE00011006, WBGENE00013901, WBGENE00018543, WBGENE00019515, WBGENE00019234, WBGENE00010904, WBGENE00021709, WBGENE00018789, WBGENE00015577, WBGENE00016013, WBGENE00007455, WBGENE00020592	484	83	9479	4.24729	0.000329039	0.000329039	0.00101249
GOTERM_CC_DIRECT	GO:0043231~intracellular membrane-bounded organelle	19	2.5	6.76543e-06	WBGENE00007904, WBGENE00015449, WBGENE00017959, WBGENE00009450, WBGENE00019379, WBGENE00015693, WBGENE00015695, WBGENE00011006, WBGENE00013901, WBGENE00018543, WBGENE00019515, WBGENE00019234, WBGENE00010904, WBGENE00021709, WBGENE00018789, WBGENE00015577, WBGENE00016013, WBGENE00007455, WBGENE00020592	533	116	11373	3.49497	0.00121704	0.000608705	0.00833299
GOTERM_MF_DIRECT	GO:0008233~peptidase activity	29	3.81579	9.26848e-06	WBGENE00007605, WBGENE00003545, WBGENE00003526, WBGENE00019617, WBGENE00012445, WBGENE00003547, WBGENE00003549, WBGENE00019105, WBGENE00019986, WBGENE00000781, WBGENE00003528, WBGENE00009958, WBGENE00006954, WBGENE00017881, WBGENE00001690, WBGENE00003530, WBGENE00001055, WBGENE00003552, WBGENE00003553, WBGENE00003531, WBGENE00018984, WBGENE00020082, WBGENE00000214, WBGENE00000215, WBGENE00015206,…	484	224	9479	2.53552	0.00428213	0.00214336	0.0132019
GOTERM_CC_DIRECT	GO:0005783~endoplasmic reticulum	28	3.68421	1.03627e-05	WBGENE00002044, WBGENE00022122, WBGENE00011681, WBGENE00007210, WBGENE00011488, WBGENE00015752, WBGENE00013740, WBGENE00000198, WBGENE00001331, WBGENE00020216, WBGENE00001612, WBGENE00020197, WBGENE00022793, WBGENE00013668, WBGENE00044631, WBGENE00006308, WBGENE00002173, WBGENE00013238, WBGENE00003962, WBGENE00004788, WBGENE00018657, WBGENE00002007, WBGENE00008411, WBGENE00008258, WBGENE00015206,…	533	231	11373	2.58639	0.00186356	0.000621571	0.0127635
GOTERM_MF_DIRECT	GO:0016740~transferase activity	71	9.34211	1.79314e-05	WBGENE00010356, WBGENE00001508, WBGENE00001239, WBGENE00009342, WBGENE00018569, WBGENE00000900, WBGENE00007175, WBGENE00013901, WBGENE00001240, WBGENE00018573, WBGENE00010904, WBGENE00021709, WBGENE00044071, WBGENE00008629, WBGENE00003402, WBGENE00016013, WBGENE00001637, WBGENE00015814, WBGENE00011147, WBGENE00017959, WBGENE00007104, WBGENE00010988, WBGENE00002030, WBGENE00010383, WBGENE00015478,…	484	836	9479	1.66329	0.00826794	0.00276361	0.0255397
GOTERM_MF_DIRECT	GO:0015020~glucuronosyltransferase activity	14	1.84211	2.26762e-05	WBGENE00017959, WBGENE00009450, WBGENE00015693, WBGENE00015695, WBGENE00011006, WBGENE00013901, WBGENE00019515, WBGENE00018543, WBGENE00019234, WBGENE00010904, WBGENE00021709, WBGENE00016013, WBGENE00007455, WBGENE00020592	484	66	9479	4.15433	0.0104443	0.00262136	0.0322967
GOTERM_BP_DIRECT	GO:0018996~molting cycle, collagen and cuticulin-based cuticle	33	4.34211	2.40388e-05	WBGENE00003545, WBGENE00006936, WBGENE00003547, WBGENE00012186, WBGENE00003549, WBGENE00006917, WBGENE00004228, WBGENE00001089, WBGENE00000902, WBGENE00004224, WBGENE00004234, WBGENE00003497, WBGENE00022743, WBGENE00004230, WBGENE00001690, WBGENE00004210, WBGENE00003552, WBGENE00022793, WBGENE00006920, WBGENE00020554, WBGENE00003553, WBGENE00004218, WBGENE00004219, WBGENE00004237, WBGENE00016422,…	566	300	11627	2.25966	0.0174663	0.00293246	0.0364692
GOTERM_MF_DIRECT	GO:0016787~hydrolase activity	65	8.55263	0.000127286	WBGENE00003545, WBGENE00003547, WBGENE00012445, WBGENE00007755, WBGENE00003549, WBGENE00019986, WBGENE00000781, WBGENE00014009, WBGENE00020114, WBGENE00006954, WBGENE00017881, WBGENE00009142, WBGENE00016664, WBGENE00003552, WBGENE00006921, WBGENE00006920, WBGENE00007904, WBGENE00000939, WBGENE00003553, WBGENE00009717, WBGENE00010284, WBGENE00006308, WBGENE00000214, WBGENE00020082, WBGENE00000215,…	484	793	9479	1.6053	0.0572342	0.0117183	0.181163
GOTERM_CC_DIRECT	GO:0016020~membrane	328	43.1579	0.000143906	WBGENE00006911, WBGENE00011888, WBGENE00022313, WBGENE00018871, WBGENE00006816, WBGENE00019379, WBGENE00008150, WBGENE00013848, WBGENE00009965, WBGENE00016716, WBGENE00009304, WBGENE00011488, WBGENE00015777, WBGENE00010705, WBGENE00010904, WBGENE00012346, WBGENE00021709, WBGENE00044071, WBGENE00010214, WBGENE00016013, WBGENE00003519, WBGENE00018356, WBGENE00011723, WBGENE00000003, WBGENE00013007,…	533	6114	11373	1.14471	0.0255723	0.00645531	0.177112
GOTERM_MF_DIRECT	GO:0008237~metallopeptidase activity	19	2.5	0.000146835	WBGENE00003545, WBGENE00003526, WBGENE00003553, WBGENE00003547, WBGENE00003549, WBGENE00007071, WBGENE00003531, WBGENE00020788, WBGENE00006324, WBGENE00003528, WBGENE00020567, WBGENE00016423, WBGENE00009958, WBGENE00011803, WBGENE00020082, WBGENE00015206, WBGENE00003530, WBGENE00022073, WBGENE00003552	484	134	9479	2.77694	0.0657297	0.0112676	0.208958
GOTERM_CC_DIRECT	GO:0005777~peroxisome	9	1.18421	0.000306548	WBGENE00019060, WBGENE00008566, WBGENE00008167, WBGENE00007130, WBGENE00004058, WBGENE00004059, WBGENE00004197, WBGENE00004198, WBGENE00015783	533	38	11373	5.05367	0.0536919	0.0109767	0.376936
GOTERM_CC_DIRECT	GO:0030056~hemidesmosome	6	0.789474	0.000446369	WBGENE00003497, WBGENE00010251, WBGENE00003911, WBGENE00003482, WBGENE00006876, WBGENE00002915	533	15	11373	8.53508	0.07722	0.0133048	0.548428
GOTERM_CC_DIRECT	GO:0030054~cell junction	19	2.5	0.000487371	WBGENE00006363, WBGENE00021146, WBGENE00002991, WBGENE00006749, WBGENE00000047, WBGENE00000395, WBGENE00009304, WBGENE00001616, WBGENE00003497, WBGENE00004719, WBGENE00000055, WBGENE00010275, WBGENE00004921, WBGENE00002974, WBGENE00000289, WBGENE00001612, WBGENE00002123, WBGENE00001591, WBGENE00006774	533	160	11373	2.53385	0.0840085	0.0124572	0.598666
GOTERM_MF_DIRECT	GO:0003824~catalytic activity	35	4.60526	0.000510369	WBGENE00013575, WBGENE00010148, WBGENE00007755, WBGENE00006607, WBGENE00015057, WBGENE00006351, WBGENE00009342, WBGENE00016103, WBGENE00019895, WBGENE00016716, WBGENE00008669, WBGENE00004258, WBGENE00003214, WBGENE00007130, WBGENE00007228, WBGENE00019620, WBGENE00020139, WBGENE00008644, WBGENE00018152, WBGENE00022037, WBGENE00015814, WBGENE00018174, WBGENE00010055, WBGENE00010284, WBGENE00020022,…	484	367	9479	1.86775	0.210505	0.0332022	0.724553
GOTERM_BP_DIRECT	GO:0006811~ion transport	33	4.34211	0.000704714	WBGENE00022336, WBGENE00003572, WBGENE00006911, WBGENE00021146, WBGENE00006749, WBGENE00006681, WBGENE00010784, WBGENE00001616, WBGENE00015777, WBGENE00000055, WBGENE00006671, WBGENE00012531, WBGENE00000845, WBGENE00019289, WBGENE00001612, WBGENE00003731, WBGENE00001591, WBGENE00006774, WBGENE00003519, WBGENE00006921, WBGENE00006920, WBGENE00013025, WBGENE00011891, WBGENE00015334, WBGENE00000047,…	566	360	11627	1.88305	0.403537	0.0711608	1.06398
GOTERM_BP_DIRECT	GO:0015991~ATP hydrolysis coupled proton transport	7	0.921053	0.000814377	WBGENE00022336, WBGENE00006921, WBGENE00006911, WBGENE00013025, WBGENE00006920, WBGENE00006917, WBGENE00021952	566	24	11627	5.99153	0.449639	0.0719296	1.2286
GOTERM_MF_DIRECT	GO:0008194~UDP-glycosyltransferase activity	7	0.921053	0.000814681	WBGENE00011006, WBGENE00013901, WBGENE00015449, WBGENE00009450, WBGENE00018789, WBGENE00015577, WBGENE00019379	484	23	9479	5.96056	0.314325	0.0460737	1.15425
GOTERM_BP_DIRECT	GO:0007271~synaptic transmission, cholinergic	12	1.57895	0.00093528	WBGENE00006757, WBGENE00001518, WBGENE00011488, WBGENE00021146, WBGENE00000055, WBGENE00001648, WBGENE00000047, WBGENE00000845, WBGENE00004364, WBGENE00002974, WBGENE00004267, WBGENE00006774	566	75	11627	3.28678	0.496354	0.0733775	1.40979
GOTERM_BP_DIRECT	GO:0015031~protein transport	17	2.23684	0.00124303	WBGENE00020383, WBGENE00013855, WBGENE00006757, WBGENE00019481, WBGENE00004267, WBGENE00004302, WBGENE00004755, WBGENE00009783, WBGENE00003878, WBGENE00003877, WBGENE00011775, WBGENE00001331, WBGENE00009732, WBGENE00004197, WBGENE00013311, WBGENE00000164, WBGENE00004198	566	140	11627	2.49443	0.598162	0.087138	1.86959
GOTERM_MF_DIRECT	GO:0004601~peroxidase activity	7	0.921053	0.00131045	WBGENE00011530, WBGENE00022743, WBGENE00015841, WBGENE00004257, WBGENE00004256, WBGENE00017968, WBGENE00018771	484	25	9479	5.48372	0.455091	0.0652346	1.85058
GOTERM_CC_DIRECT	GO:0016021~integral component of membrane	317	41.7105	0.00145947	WBGENE00006911, WBGENE00011888, WBGENE00022313, WBGENE00018871, WBGENE00006816, WBGENE00019379, WBGENE00013848, WBGENE00009965, WBGENE00016716, WBGENE00009304, WBGENE00011488, WBGENE00015777, WBGENE00010705, WBGENE00010904, WBGENE00012346, WBGENE00021709, WBGENE00044071, WBGENE00010214, WBGENE00016013, WBGENE00003519, WBGENE00018356, WBGENE00011723, WBGENE00000003, WBGENE00013007, WBGENE00000007,…	533	6032	11373	1.12136	0.231178	0.032328	1.78293
GOTERM_BP_DIRECT	GO:0055114~oxidation-reduction process	42	5.52632	0.00159651	WBGENE00011530, WBGENE00010148, WBGENE00019060, WBGENE00006510, WBGENE00010317, WBGENE00007210, WBGENE00015057, WBGENE00009342, WBGENE00022766, WBGENE00016103, WBGENE00001501, WBGENE00009902, WBGENE00017565, WBGENE00013197, WBGENE00015783, WBGENE00017125, WBGENE00022743, WBGENE00004257, WBGENE00008566, WBGENE00011676, WBGENE00004256, WBGENE00010705, WBGENE00017968, WBGENE00000198, WBGENE00000988,…	566	522	11627	1.65284	0.689999	0.100999	2.39527
GOTERM_BP_DIRECT	GO:0042335~cuticle development	6	0.789474	0.00175317	WBGENE00012032, WBGENE00002827, WBGENE00008132, WBGENE00007926, WBGENE00016422, WBGENE00019148	566	19	11627	6.48707	0.723681	0.101639	2.62739
GOTERM_BP_DIRECT	GO:0006491~N-glycan processing	5	0.657895	0.00199762	WBGENE00020197, WBGENE00008411, WBGENE00019763, WBGENE00008258, WBGENE00010284	566	12	11627	8.55933	0.769089	0.106624	2.98858
GOTERM_CC_DIRECT	GO:0045202~synapse	16	2.10526	0.00228485	WBGENE00006363, WBGENE00021146, WBGENE00001519, WBGENE00000047, WBGENE00001616, WBGENE00004719, WBGENE00000055, WBGENE00020114, WBGENE00010275, WBGENE00004921, WBGENE00004364, WBGENE00002974, WBGENE00000289, WBGENE00001612, WBGENE00001591, WBGENE00006774	533	140	11373	2.4386	0.337506	0.0447186	2.77826
GOTERM_MF_DIRECT	GO:0004190~aspartic-type endopeptidase activity	7	0.921053	0.00244825	WBGENE00007605, WBGENE00000214, WBGENE00000215, WBGENE00019105, WBGENE00000218, WBGENE00017881, WBGENE00000219	484	28	9479	4.89618	0.678555	0.107289	3.43147
GOTERM_MF_DIRECT	GO:0016757~transferase activity, transferring glycosyl groups	18	2.36842	0.00261563	WBGENE00019763, WBGENE00001508, WBGENE00007104, WBGENE00009450, WBGENE00015695, WBGENE00011006, WBGENE00013901, WBGENE00021407, WBGENE00017151, WBGENE00020696, WBGENE00010904, WBGENE00019127, WBGENE00019298, WBGENE00007949, WBGENE00021709, WBGENE00016013, WBGENE00001637, WBGENE00007455	484	157	9479	2.24538	0.702584	0.10438	3.66203
GOTERM_MF_DIRECT	GO:0004180~carboxypeptidase activity	6	0.789474	0.00430443	WBGENE00019617, WBGENE00012445, WBGENE00011235, WBGENE00020082, WBGENE00019074, WBGENE00008521	484	22	9479	5.34128	0.864293	0.153325	5.95978
GOTERM_MF_DIRECT	GO:0022857~transmembrane transporter activity	14	1.84211	0.00445825	WBGENE00010918, WBGENE00011718, WBGENE00006220, WBGENE00022788, WBGENE00008110, WBGENE00003837, WBGENE00016431, WBGENE00007388, WBGENE00019979, WBGENE00017751, WBGENE00018138, WBGENE00012130, WBGENE00018779, WBGENE00007947	484	112	9479	2.44809	0.873661	0.147121	6.1665
GOTERM_MF_DIRECT	GO:0030170~pyridoxal phosphate binding	9	1.18421	0.00502371	WBGENE00015814, WBGENE00003214, WBGENE00008732, WBGENE00020696, WBGENE00022856, WBGENE00020139, WBGENE00010759, WBGENE00001149, WBGENE00010456	484	53	9479	3.32571	0.902883	0.153428	6.92286
GOTERM_CC_DIRECT	GO:0045211~postsynaptic membrane	8	1.05263	0.00515868	WBGENE00001616, WBGENE00000055, WBGENE00020506, WBGENE00000047, WBGENE00002974, WBGENE00001612, WBGENE00001591, WBGENE00006774	533	46	11373	3.71091	0.605827	0.0888945	6.17196
GOTERM_MF_DIRECT	GO:0016491~oxidoreductase activity	35	4.60526	0.00528138	WBGENE00010148, WBGENE00006510, WBGENE00010317, WBGENE00007210, WBGENE00015057, WBGENE00022766, WBGENE00009342, WBGENE00016103, WBGENE00001501, WBGENE00017565, WBGENE00009902, WBGENE00013197, WBGENE00015783, WBGENE00017125, WBGENE00022743, WBGENE00011676, WBGENE00004256, WBGENE00010705, WBGENE00000198, WBGENE00000988, WBGENE00007108, WBGENE00010055, WBGENE00008167, WBGENE00009450, WBGENE00015043,…	484	422	9479	1.62432	0.913858	0.150792	7.26563
GOTERM_BP_DIRECT	GO:0098869~cellular oxidant detoxification	7	0.921053	0.00538809	WBGENE00011530, WBGENE00022743, WBGENE00015841, WBGENE00004257, WBGENE00004256, WBGENE00017968, WBGENE00018771	566	34	11627	4.22932	0.98094	0.24638	7.87075
GOTERM_MF_DIRECT	GO:0016798~hydrolase activity, acting on glycosyl bonds	8	1.05263	0.0055764	WBGENE00020197, WBGENE00008411, WBGENE00008258, WBGENE00007904, WBGENE00006607, WBGENE00010284, WBGENE00011095, WBGENE00019895	484	43	9479	3.64367	0.924912	0.149405	7.65664
GOTERM_MF_DIRECT	GO:0004185~serine-type carboxypeptidase activity	6	0.789474	0.00638794	WBGENE00019617, WBGENE00012445, WBGENE00003958, WBGENE00019074, WBGENE00018984, WBGENE00012530	484	24	9479	4.89618	0.948548	0.160153	8.72435
GOTERM_MF_DIRECT	GO:0015297~antiporter activity	6	0.789474	0.00638794	WBGENE00000003, WBGENE00003572, WBGENE00003729, WBGENE00000007, WBGENE00015197, WBGENE00003731	484	24	9479	4.89618	0.948548	0.160153	8.72435
GOTERM_BP_DIRECT	GO:0006631~fatty acid metabolic process	8	1.05263	0.00714252	WBGENE00019060, WBGENE00001240, WBGENE00008566, WBGENE00008167, WBGENE00001239, WBGENE00001244, WBGENE00000198, WBGENE00006351	566	47	11627	3.49658	0.994775	0.295512	10.306
GOTERM_MF_DIRECT	GO:0004181~metallocarboxypeptidase activity	5	0.657895	0.00742348	WBGENE00011235, WBGENE00020082, WBGENE00019074, WBGENE00008521, WBGENE00012168	484	16	9479	6.12022	0.968251	0.174413	10.0701
GOTERM_BP_DIRECT	GO:0022404~molting cycle process	5	0.657895	0.00791469	WBGENE00012032, WBGENE00002827, WBGENE00007926, WBGENE00016422, WBGENE00019148	566	17	11627	6.04188	0.997046	0.305133	11.3587
GOTERM_CC_DIRECT	GO:0005882~intermediate filament	5	0.657895	0.00857849	WBGENE00003497, WBGENE00003911, WBGENE00002055, WBGENE00003482, WBGENE00006876	533	18	11373	5.92714	0.78792	0.131494	10.0684
GOTERM_CC_DIRECT	GO:0016324~apical plasma membrane	9	1.18421	0.00873933	WBGENE00019717, WBGENE00003877, WBGENE00006917, WBGENE00000493, WBGENE00006876, WBGENE00019289, WBGENE00015648, WBGENE00004210, WBGENE00010621	533	63	11373	3.04824	0.794024	0.123366	10.248
GOTERM_CC_DIRECT	GO:0005615~extracellular space	22	2.89474	0.00959357	WBGENE00008644, WBGENE00011235, WBGENE00012184, WBGENE00009158, WBGENE00006366, WBGENE00019074, WBGENE00019986, WBGENE00009108, WBGENE00009094, WBGENE00000781, WBGENE00021389, WBGENE00012202, WBGENE00004257, WBGENE00004256, WBGENE00006570, WBGENE00011285, WBGENE00006950, WBGENE00006954, WBGENE00000219, WBGENE00008521, WBGENE00012168, WBGENE00018958	533	258	11373	1.81949	0.823631	0.124951	11.1961
GOTERM_BP_DIRECT	GO:0008652~cellular amino acid biosynthetic process	5	0.657895	0.00979175	WBGENE00006510, WBGENE00022856, WBGENE00010988, WBGENE00010759, WBGENE00001149	566	18	11627	5.70622	0.999263	0.345758	13.8696

## Sheet: Overlap development down
Category	Term	Count	%	PValue	Genes	List Total	Pop Hits	Pop Total	Fold Enrichment	Bonferroni	Benjamini	FDR
GOTERM_MF_DIRECT	GO:0042302~structural constituent of cuticle	9	10.9756	2.13341e-09	DPY-8, DPY-9, SQT-1, LON-3, COL-41, DPY-2, ROL-6, DPY-10, COL-110	23	168	9479	22.0784	3.84014e-08	3.84014e-08	1.57259e-06
GOTERM_MF_DIRECT	GO:0042329~structural constituent of collagen and cuticulin-based cuticle	5	6.09756	1.54872e-07	SQT-1, LON-3, DPY-2, ROL-6, DPY-10	23	22	9479	93.666	2.78769e-06	1.39385e-06	0.00011416
GOTERM_CC_DIRECT	GO:0005581~collagen trimer	8	9.7561	4.23908e-07	SQT-1, COL-128, LON-3, COL-41, DPY-2, ROL-6, DPY-10, COL-110	33	174	11373	15.8454	5.9347e-06	5.9347e-06	0.000287956
GOTERM_BP_DIRECT	GO:0040002~collagen and cuticulin-based cuticle development	7	8.53659	1.13257e-06	DPY-8, SQT-1, GLF-1, CUTI-1, DPY-2, ROL-6, DPY-10	37	113	11627	19.4664	6.34222e-05	6.34222e-05	0.00111834
GOTERM_BP_DIRECT	GO:0040011~locomotion	17	20.7317	1.29721e-06	DPY-8, GLF-1, DPY-9, NOAH-2, DPY-2, ACN-1, DPY-10, WRT-10, T19B10.2, LPR-4, C26B9.3, LPR-3, CUTI-1, WRT-1, ROL-6, COL-110, Y73E7A.8	37	1405	11627	3.80223	7.2641e-05	3.63211e-05	0.0012809
GOTERM_BP_DIRECT	GO:0010171~body morphogenesis	10	12.1951	8.04097e-05	DPY-8, DPY-9, SQT-1, GLF-1, LON-3, CUTI-1, DPY-2, ROL-6, DPY-10, COL-110	37	616	11627	5.10135	0.004493	0.00149991	0.0793712
GOTERM_BP_DIRECT	GO:0044765~single-organism transport	3	3.65854	0.000193845	LPR-1, LPR-4, LPR-3	37	7	11627	134.676	0.0107977	0.00271042	0.191246
GOTERM_CC_DIRECT	GO:0005576~extracellular region	7	8.53659	0.000277465	NLP-31, LPR-1, LPR-4, LPR-3, WRT-1, DPY-10, C06A6.5	33	331	11373	7.28838	0.00387751	0.00194064	0.188328
GOTERM_BP_DIRECT	GO:0018996~molting cycle, collagen and cuticulin-based cuticle	7	8.53659	0.000284604	GLF-1, T19B10.2, NOAH-2, CUTI-1, WRT-1, ACN-1, PTR-15	37	300	11627	7.33234	0.0158137	0.00318294	0.280674
GOTERM_BP_DIRECT	GO:0060548~negative regulation of cell death	2	2.43902	0.00926079	Y57A10A.23, F49H12.5	37	3	11627	209.495	0.406086	0.0831732	8.77768
GOTERM_MF_DIRECT	GO:0016853~isomerase activity	3	3.65854	0.00950295	GLF-1, CYN-6, FKB-4	23	64	9479	19.3186	0.157912	0.0556801	6.79636
GOTERM_BP_DIRECT	GO:0030163~protein catabolic process	4	4.87805	0.0124471	SQT-1, DPY-2, ROL-6, DPY-10	37	157	11627	8.0062	0.504116	0.0953452	11.6336
GOTERM_BP_DIRECT	GO:0040018~positive regulation of multicellular organism growth	5	6.09756	0.0237426	DPY-8, GLF-1, WRT-10, WRT-1, ACN-1	37	357	11627	4.40117	0.739623	0.154818	21.1223
GOTERM_CC_DIRECT	GO:0060102~collagen and cuticulin-based cuticle extracellular matrix	2	2.43902	0.030532	LON-3, ROL-6	33	11	11373	62.6612	0.352158	0.134721	18.9929
GOTERM_BP_DIRECT	GO:0006457~protein folding	3	3.65854	0.030843	CYN-6, C06A6.5, FKB-4	37	89	11627	10.5925	0.82699	0.177111	26.6077
GOTERM_BP_DIRECT	GO:0040032~post-embryonic body morphogenesis	2	2.43902	0.0395318	DPY-2, DPY-10	37	13	11627	48.3451	0.895517	0.20218	32.8524
GOTERM_BP_DIRECT	GO:0022404~molting cycle process	2	2.43902	0.0513868	ZC449.1, NOAH-2	37	17	11627	36.9698	0.947881	0.235525	40.6023
GOTERM_BP_DIRECT	GO:0042335~cuticle development	2	2.43902	0.0572608	ZC449.1, NOAH-2	37	19	11627	33.0782	0.963193	0.240559	44.1359
GOTERM_MF_DIRECT	GO:0003755~peptidyl-prolyl cis-trans isomerase activity	2	2.43902	0.065258	CYN-6, FKB-4	23	29	9479	28.4228	0.703209	0.261904	39.1918
GOTERM_BP_DIRECT	GO:0002064~epithelial cell development	2	2.43902	0.0717915	ZC449.1, NOAH-2	37	24	11627	26.1869	0.984578	0.274518	52.0797
GOTERM_BP_DIRECT	GO:0000413~protein peptidyl-prolyl isomerization	2	2.43902	0.0832591	CYN-6, FKB-4	37	28	11627	22.4459	0.992312	0.293704	57.6153
GOTERM_BP_DIRECT	GO:0018991~oviposition	4	4.87805	0.0926016	DPY-8, C26B9.3, ACN-1, ROL-6	37	349	11627	3.60164	0.995668	0.304262	61.6927

## Sheet: Late Up
Category	Term	Count	%	PValue	Genes	List Total	Pop Hits	Pop Total	Fold Enrichment	Bonferroni	Benjamini	FDR
GOTERM_BP_DIRECT	GO:0000003~reproduction	50	21.3675	1.82993e-05	WBGENE00009442, WBGENE00001402, WBGENE00022048, WBGENE00001401, WBGENE00019836, WBGENE00001832, WBGENE00011116, WBGENE00001232, WBGENE00001933, WBGENE00003495, WBGENE00021681, WBGENE00008722, WBGENE00001590, WBGENE00018967, WBGENE00020111, WBGENE00013289, WBGENE00011109, WBGENE00006385, WBGENE00006759, WBGENE00003132, WBGENE00004271, WBGENE00010425, WBGENE00001228, WBGENE00000499, WBGENE00001514,…	147	2205	11627	1.79354	0.00536561	0.00536561	0.0243753
GOTERM_CC_DIRECT	GO:0005737~cytoplasm	34	14.5299	4.86699e-05	WBGENE00001483, WBGENE00001402, WBGENE00001401, WBGENE00001482, WBGENE00009531, WBGENE00044501, WBGENE00007110, WBGENE00001832, WBGENE00000065, WBGENE00011116, WBGENE00001232, WBGENE00020090, WBGENE00017245, WBGENE00018967, WBGENE00015293, WBGENE00194707, WBGENE00001336, WBGENE00013111, WBGENE00006385, WBGENE00006779, WBGENE00019801, WBGENE00010425, WBGENE00012717, WBGENE00006825, WBGENE00001228,…	124	1518	11373	2.05428	0.00495215	0.00495215	0.0542084
GOTERM_CC_DIRECT	GO:0005634~nucleus	35	14.9573	0.00134995	WBGENE00001483, WBGENE00003604, WBGENE00044501, WBGENE00006394, WBGENE00000866, WBGENE00007110, WBGENE00001832, WBGENE00013109, WBGENE00001854, WBGENE00002998, WBGENE00001933, WBGENE00003157, WBGENE00004333, WBGENE00008722, WBGENE00003421, WBGENE00018967, WBGENE00017696, WBGENE00020111, WBGENE00194707, WBGENE00020297, WBGENE00013111, WBGENE00001942, WBGENE00006385, WBGENE00019801, WBGENE00016115,…	124	1888	11373	1.70028	0.128717	0.0665744	1.49369
GOTERM_BP_DIRECT	GO:0006898~receptor-mediated endocytosis	20	8.54701	0.00203521	WBGENE00001483, WBGENE00001402, WBGENE00006374, WBGENE00001401, WBGENE00006787, WBGENE00007110, WBGENE00003132, WBGENE00019836, WBGENE00016115, WBGENE00001832, WBGENE00013109, WBGENE00008172, WBGENE00001228, WBGENE00000065, WBGENE00011116, WBGENE00019264, WBGENE00003495, WBGENE00021681, WBGENE00012030, WBGENE00018967	147	733	11627	2.15812	0.450618	0.258797	2.67754
GOTERM_BP_DIRECT	GO:0009792~embryo development ending in birth or egg hatching	56	23.9316	0.00206905	WBGENE00009442, WBGENE00001402, WBGENE00022048, WBGENE00001401, WBGENE00001832, WBGENE00013109, WBGENE00011116, WBGENE00001232, WBGENE00001933, WBGENE00020090, WBGENE00015291, WBGENE00010053, WBGENE00004333, WBGENE00008722, WBGENE00001590, WBGENE00018967, WBGENE00017245, WBGENE00013442, WBGENE00001336, WBGENE00011109, WBGENE00006385, WBGENE00012435, WBGENE00004271, WBGENE00003132, WBGENE00010425,…	147	3091	11627	1.43298	0.456068	0.183703	2.7215
GOTERM_BP_DIRECT	GO:0040011~locomotion	31	13.2479	0.00231534	WBGENE00001402, WBGENE00001401, WBGENE00006787, WBGENE00000866, WBGENE00007110, WBGENE00000065, WBGENE00002998, WBGENE00003495, WBGENE00021681, WBGENE00013727, WBGENE00006587, WBGENE00008722, WBGENE00015565, WBGENE00017245, WBGENE00018967, WBGENE00020297, WBGENE00006385, WBGENE00006779, WBGENE00012148, WBGENE00006759, WBGENE00016115, WBGENE00004271, WBGENE00012717, WBGENE00010425, WBGENE00006825,…	147	1405	11627	1.74516	0.494142	0.156651	3.04084
GOTERM_BP_DIRECT	GO:0071688~striated muscle myosin thick filament assembly	7	2.99145	0.010196	WBGENE00016159, WBGENE00006787, WBGENE00006495, WBGENE00012030, WBGENE00019836, WBGENE00006825, WBGENE00000065	147	146	11627	3.79224	0.950857	0.452615	12.7617
GOTERM_BP_DIRECT	GO:0042006~masculinization of hermaphroditic germ-line	3	1.28205	0.0147731	WBGENE00001483, WBGENE00001402, WBGENE00001401	147	15	11627	15.819	0.987421	0.517746	17.9855
GOTERM_BP_DIRECT	GO:0017148~negative regulation of translation	3	1.28205	0.0188242	WBGENE00001402, WBGENE00001401, WBGENE00001482	147	17	11627	13.958	0.996254	0.54984	22.3659
GOTERM_MF_DIRECT	GO:0003684~damaged DNA binding	3	1.28205	0.0430936	WBGENE00004333, WBGENE00003421, WBGENE00017696	127	25	9479	8.95654	0.997386	0.997386	40.335
GOTERM_MF_DIRECT	GO:0046982~protein heterodimerization activity	5	2.13675	0.0453617	WBGENE00001933, WBGENE00001942, WBGENE00006394, WBGENE00009584, WBGENE00001890	127	101	9479	3.69494	0.998102	0.956437	41.9722
GOTERM_CC_DIRECT	GO:0000793~condensed chromosome	3	1.28205	0.0519843	WBGENE00194892, WBGENE00008580, WBGENE00001832	124	34	11373	8.09274	0.995683	0.837172	44.8293
GOTERM_BP_DIRECT	GO:0007126~meiotic nuclear division	5	2.13675	0.0524293	WBGENE00022048, WBGENE00004333, WBGENE00000499, WBGENE00001514, WBGENE00006780	147	112	11627	3.53104	1	0.86181	51.1996
GOTERM_BP_DIRECT	GO:0002119~nematode larval development	34	14.5299	0.0529427	WBGENE00009442, WBGENE00006787, WBGENE00000866, WBGENE00007110, WBGENE00000869, WBGENE00019836, WBGENE00013109, WBGENE00000065, WBGENE00002998, WBGENE00011116, WBGENE00001933, WBGENE00019264, WBGENE00021681, WBGENE00001590, WBGENE00016073, WBGENE00003421, WBGENE00017245, WBGENE00018967, WBGENE00020297, WBGENE00001336, WBGENE00011109, WBGENE00006385, WBGENE00012148, WBGENE00012435, WBGENE00016115,…	147	1993	11627	1.34934	1	0.830843	51.5506
GOTERM_BP_DIRECT	GO:0030728~ovulation	3	1.28205	0.0607897	WBGENE00001482, WBGENE00022048, WBGENE00003495	147	32	11627	7.41518	1	0.841792	56.6339
GOTERM_CC_DIRECT	GO:0000795~synaptonemal complex	2	0.854701	0.0631746	WBGENE00004333, WBGENE00003421	124	6	11373	30.5726	0.998714	0.810637	51.6656
GOTERM_MF_DIRECT	GO:0003713~transcription coactivator activity	3	1.28205	0.0671225	WBGENE00006394, WBGENE00010425, WBGENE00004136	127	32	9479	6.99729	0.999916	0.956136	55.7175
GOTERM_CC_DIRECT	GO:0005576~extracellular region	8	3.4188	0.0676389	WBGENE00001444, WBGENE00006787, WBGENE00002108, WBGENE00001446, WBGENE00017219, WBGENE00002254, WBGENE00019833, WBGENE00002110	124	331	11373	2.21674	0.99921	0.760383	54.1705
GOTERM_BP_DIRECT	GO:0006281~DNA repair	5	2.13675	0.0707672	WBGENE00001942, WBGENE00004333, WBGENE00017696, WBGENE00000499, WBGENE00001890	147	124	11627	3.18932	1	0.859377	62.3851
GOTERM_BP_DIRECT	GO:0051177~meiotic sister chromatid cohesion	2	0.854701	0.0730312	WBGENE00004333, WBGENE00021560	147	6	11627	26.3651	1	0.84401	63.5878
GOTERM_CC_DIRECT	GO:0000786~nucleosome	4	1.7094	0.0737282	WBGENE00001933, WBGENE00001942, WBGENE00001854, WBGENE00001890	124	90	11373	4.07634	0.999595	0.72801	57.3968
GOTERM_CC_DIRECT	GO:0005694~chromosome	4	1.7094	0.0776242	WBGENE00001942, WBGENE00004333, WBGENE00001832, WBGENE00001854	124	92	11373	3.98773	0.999737	0.691924	59.3511
GOTERM_BP_DIRECT	GO:0040022~feminization of hermaphroditic germ-line	3	1.28205	0.078415	WBGENE00001402, WBGENE00001401, WBGENE00018967	147	37	11627	6.41313	1	0.842255	66.3065
GOTERM_BP_DIRECT	GO:0040035~hermaphrodite genitalia development	15	6.41026	0.0799129	WBGENE00001402, WBGENE00007110, WBGENE00000869, WBGENE00003132, WBGENE00019836, WBGENE00001228, WBGENE00000065, WBGENE00002998, WBGENE00011116, WBGENE00021681, WBGENE00008722, WBGENE00013727, WBGENE00001590, WBGENE00016621, WBGENE00018967	147	738	11627	1.60763	1	0.826057	67.0288
GOTERM_BP_DIRECT	GO:0008033~tRNA processing	3	1.28205	0.082112	WBGENE00019264, WBGENE00016621, WBGENE00194707	147	38	11627	6.24436	1	0.8135	68.0633
GOTERM_CC_DIRECT	GO:0005861~troponin complex	2	0.854701	0.0833402	WBGENE00003495, WBGENE00006587	124	8	11373	22.9294	0.99986	0.670273	62.071
GOTERM_BP_DIRECT	GO:1903506~regulation of nucleic acid-templated transcription	2	0.854701	0.0846771	WBGENE00006394, WBGENE00004136	147	7	11627	22.5986	1	0.803244	69.232
GOTERM_MF_DIRECT	GO:0003730~mRNA 3'-UTR binding	3	1.28205	0.0863937	WBGENE00001402, WBGENE00001401, WBGENE00011376	127	37	9479	6.05171	0.999995	0.952617	65.3302
GOTERM_MF_DIRECT	GO:0004674~protein serine/threonine kinase activity	8	3.4188	0.0927562	WBGENE00002189, WBGENE00044501, WBGENE00019801, WBGENE00006779, WBGENE00013727, WBGENE00006759, WBGENE00015293, WBGENE00000499	127	291	9479	2.0519	0.999998	0.927798	68.0575
GOTERM_CC_DIRECT	GO:0000790~nuclear chromatin	3	1.28205	0.0949211	WBGENE00001942, WBGENE00004333, WBGENE00001890	124	48	11373	5.73236	0.999962	0.677067	67.0803
GOTERM_CC_DIRECT	GO:0005654~nucleoplasm	3	1.28205	0.098286	WBGENE00004333, WBGENE00001832, WBGENE00010425	124	49	11373	5.61537	0.999974	0.651902	68.4184

## Sheet: Late Down
Category	Term	Count	%	PValue	Genes	List Total	Pop Hits	Pop Total	Fold Enrichment	Bonferroni	Benjamini	FDR
GOTERM_MF_DIRECT	GO:0042302~structural constituent of cuticle	54	8.16944	3.62355e-36	WBGENE00000742, WBGENE00000741, WBGENE00000743, WBGENE00000740, WBGENE00000746, WBGENE00000681, WBGENE00001067, WBGENE00000747, WBGENE00000693, WBGENE00000673, WBGENE00000696, WBGENE00001074, WBGENE00000704, WBGENE00001071, WBGENE00001070, WBGENE00000699, WBGENE00000679, WBGENE00000631, WBGENE00000733, WBGENE00000601, WBGENE00000603, WBGENE00000738, WBGENE00000609, WBGENE00000691, WBGENE00000735,…	344	168	9479	8.85704	1.04721e-33	1.04721e-33	4.81457e-33
GOTERM_CC_DIRECT	GO:0005581~collagen trimer	52	7.86687	2.66861e-35	WBGENE00000742, WBGENE00000741, WBGENE00000743, WBGENE00000740, WBGENE00000746, WBGENE00000681, WBGENE00001067, WBGENE00000747, WBGENE00000693, WBGENE00000673, WBGENE00000696, WBGENE00001074, WBGENE00000704, WBGENE00000702, WBGENE00000699, WBGENE00000630, WBGENE00000679, WBGENE00000631, WBGENE00000733, WBGENE00000601, WBGENE00000603, WBGENE00000738, WBGENE00000609, WBGENE00000691, WBGENE00000735,…	368	174	11373	9.23594	2.82873e-33	2.82873e-33	2.99446e-32
GOTERM_BP_DIRECT	GO:0040002~collagen and cuticulin-based cuticle development	17	2.57186	1.18273e-06	WBGENE00003476, WBGENE00004397, WBGENE00005018, WBGENE00000603, WBGENE00022591, WBGENE00005016, WBGENE00001067, WBGENE00000656, WBGENE00001077, WBGENE00001074, WBGENE00019154, WBGENE00000616, WBGENE00022631, WBGENE00001070, WBGENE00000254, WBGENE00000255, WBGENE00001065	394	113	11627	4.43958	0.000567552	0.000567552	0.00169339
GOTERM_BP_DIRECT	GO:0055114~oxidation-reduction process	40	6.05144	2.64156e-06	WBGENE00000373, WBGENE00017340, WBGENE00010317, WBGENE00021646, WBGENE00018996, WBGENE00022766, WBGENE00001993, WBGENE00009980, WBGENE00017734, WBGENE00019819, WBGENE00000115, WBGENE00013197, WBGENE00000984, WBGENE00001077, WBGENE00010661, WBGENE00000929, WBGENE00020917, WBGENE00015332, WBGENE00185014, WBGENE00000988, WBGENE00009712, WBGENE00017934, WBGENE00019489, WBGENE00021548, WBGENE00018419,…	394	522	11627	2.26131	0.00126715	0.000633774	0.00378205
GOTERM_BP_DIRECT	GO:0010171~body morphogenesis	44	6.65658	4.61383e-06	WBGENE00000742, WBGENE00000741, WBGENE00000157, WBGENE00000743, WBGENE00000740, WBGENE00004858, WBGENE00022591, WBGENE00000437, WBGENE00000083, WBGENE00003057, WBGENE00001067, WBGENE00001077, WBGENE00000673, WBGENE00000696, WBGENE00001074, WBGENE00021415, WBGENE00007275, WBGENE00001071, WBGENE00000727, WBGENE00001070, WBGENE00000728, WBGENE00000699, WBGENE00000659, WBGENE00003476, WBGENE00000282,…	394	616	11627	2.10787	0.00221219	0.000737942	0.00660576
GOTERM_BP_DIRECT	GO:0040011~locomotion	76	11.4977	3.20932e-05	WBGENE00000742, WBGENE00000741, WBGENE00000743, WBGENE00003925, WBGENE00000740, WBGENE00021915, WBGENE00022591, WBGENE00018928, WBGENE00000437, WBGENE00000083, WBGENE00000039, WBGENE00001077, WBGENE00003497, WBGENE00000673, WBGENE00000696, WBGENE00001074, WBGENE00021415, WBGENE00001071, WBGENE00000699, WBGENE00007999, WBGENE00001070, WBGENE00001032, WBGENE00006956, WBGENE00001699, WBGENE00004356,…	394	1405	11627	1.59628	0.0152869	0.00384383	0.0459403
GOTERM_CC_DIRECT	GO:0060102~collagen and cuticulin-based cuticle extracellular matrix	5	0.75643	0.000294015	WBGENE00001074, WBGENE00004397, WBGENE00005018, WBGENE00003057, WBGENE00001067	368	11	11373	14.0477	0.0306894	0.0154642	0.329419
GOTERM_MF_DIRECT	GO:0016491~oxidoreductase activity	31	4.68986	0.000302043	WBGENE00000373, WBGENE00010317, WBGENE00021646, WBGENE00018996, WBGENE00022766, WBGENE00001993, WBGENE00009980, WBGENE00000115, WBGENE00019819, WBGENE00013197, WBGENE00010661, WBGENE00001077, WBGENE00000984, WBGENE00015332, WBGENE00185014, WBGENE00000988, WBGENE00017934, WBGENE00019489, WBGENE00018419, WBGENE00015894, WBGENE00010055, WBGENE00015512, WBGENE00009636, WBGENE00016201, WBGENE00011398,…	344	422	9479	2.0242	0.0836012	0.0427128	0.400577
GOTERM_BP_DIRECT	GO:0042338~cuticle development involved in collagen and cuticulin-based cuticle molting cycle	4	0.605144	0.00276512	WBGENE00006592, WBGENE00004397, WBGENE00000255, WBGENE00001065	394	9	11627	13.1156	0.735284	0.233423	3.88696
GOTERM_BP_DIRECT	GO:0018996~molting cycle, collagen and cuticulin-based cuticle	21	3.177	0.00299217	WBGENE00001699, WBGENE00006947, WBGENE00001694, WBGENE00006917, WBGENE00004219, WBGENE00022591, WBGENE00004229, WBGENE00000083, WBGENE00000039, WBGENE00009926, WBGENE00011831, WBGENE00003497, WBGENE00006592, WBGENE00019154, WBGENE00007999, WBGENE00000254, WBGENE00000255, WBGENE00003485, WBGENE00004210, WBGENE00011325, WBGENE00021844	394	300	11627	2.06571	0.762692	0.213162	4.19979
GOTERM_BP_DIRECT	GO:0035434~copper ion transmembrane transport	4	0.605144	0.00385178	WBGENE00021975, WBGENE00010274, WBGENE00010277, WBGENE00019674	394	10	11627	11.8041	0.843143	0.232512	5.37564
GOTERM_BP_DIRECT	GO:0016337~single organismal cell-cell adhesion	4	0.605144	0.00385178	WBGENE00006921, WBGENE00021415, WBGENE00000437, WBGENE00003485	394	10	11627	11.8041	0.843143	0.232512	5.37564
GOTERM_CC_DIRECT	GO:0005615~extracellular space	18	2.72315	0.00424487	WBGENE00020339, WBGENE00006947, WBGENE00020566, WBGENE00016505, WBGENE00011561, WBGENE00007695, WBGENE00020049, WBGENE00020335, WBGENE00011773, WBGENE00003767, WBGENE00021213, WBGENE00013895, WBGENE00010539, WBGENE00011284, WBGENE00001449, WBGENE00007142, WBGENE00003859, WBGENE00010225	368	258	11373	2.15616	0.362954	0.139554	4.66118
GOTERM_MF_DIRECT	GO:0008289~lipid binding	8	1.21029	0.00426027	WBGENE00002258, WBGENE00003476, WBGENE00002256, WBGENE00009818, WBGENE00002259, WBGENE00013284, WBGENE00001389, WBGENE00021486	344	57	9479	3.8674	0.70883	0.337201	5.51477
GOTERM_CC_DIRECT	GO:0005576~extracellular region	21	3.177	0.00531779	WBGENE00006947, WBGENE00003526, WBGENE00018411, WBGENE00001694, WBGENE00015510, WBGENE00011561, WBGENE00005018, WBGENE00000603, WBGENE00003528, WBGENE00009983, WBGENE00003766, WBGENE00003767, WBGENE00006592, WBGENE00003768, WBGENE00002393, WBGENE00003769, WBGENE00010539, WBGENE00001449, WBGENE00013127, WBGENE00012257, WBGENE00003859	368	331	11373	1.96073	0.431748	0.131769	5.80756
GOTERM_MF_DIRECT	GO:0005375~copper ion transmembrane transporter activity	4	0.605144	0.00624068	WBGENE00021975, WBGENE00010274, WBGENE00010277, WBGENE00019674	344	11	9479	10.0201	0.836216	0.363838	7.98136
GOTERM_BP_DIRECT	GO:0006555~methionine metabolic process	3	0.453858	0.00653524	WBGENE00009636, WBGENE00019489, WBGENE00015512	394	4	11627	22.1326	0.957028	0.325242	8.96053
GOTERM_MF_DIRECT	GO:0042329~structural constituent of collagen and cuticulin-based cuticle	5	0.75643	0.00735014	WBGENE00004397, WBGENE00005016, WBGENE00000255, WBGENE00003057, WBGENE00001067	344	22	9479	6.26255	0.881404	0.347149	9.33702
GOTERM_CC_DIRECT	GO:0031012~extracellular matrix	4	0.605144	0.00749055	WBGENE00016283, WBGENE00003497, WBGENE00019212, WBGENE00020646	368	13	11373	9.5092	0.549315	0.147343	8.0907
GOTERM_BP_DIRECT	GO:0015695~organic cation transport	4	0.605144	0.00851326	WBGENE00013083, WBGENE00004359, WBGENE00000133, WBGENE00010772	394	13	11627	9.08005	0.983491	0.366176	11.5217
GOTERM_MF_DIRECT	GO:0051213~dioxygenase activity	5	0.75643	0.00864842	WBGENE00001077, WBGENE00009636, WBGENE00016201, WBGENE00019489, WBGENE00001993	344	23	9479	5.99027	0.918753	0.341886	10.8999
GOTERM_CC_DIRECT	GO:0005839~proteasome core complex	4	0.605144	0.00930822	WBGENE00003925, WBGENE00003953, WBGENE00003923, WBGENE00003952	368	14	11373	8.82997	0.628903	0.152289	9.96186
GOTERM_MF_DIRECT	GO:0015020~glucuronosyltransferase activity	8	1.21029	0.00952323	WBGENE00007885, WBGENE00015369, WBGENE00019232, WBGENE00008486, WBGENE00015692, WBGENE00017336, WBGENE00015693, WBGENE00007402	344	66	9479	3.34003	0.937049	0.326359	11.939
GOTERM_BP_DIRECT	GO:0052696~flavonoid glucuronidation	8	1.21029	0.00990538	WBGENE00007885, WBGENE00015369, WBGENE00019232, WBGENE00008486, WBGENE00015692, WBGENE00017336, WBGENE00015693, WBGENE00007402	394	71	11627	3.32509	0.99159	0.379872	13.2838
GOTERM_BP_DIRECT	GO:0009813~flavonoid biosynthetic process	8	1.21029	0.00990538	WBGENE00007885, WBGENE00015369, WBGENE00019232, WBGENE00008486, WBGENE00015692, WBGENE00017336, WBGENE00015693, WBGENE00007402	394	71	11627	3.32509	0.99159	0.379872	13.2838
GOTERM_BP_DIRECT	GO:0006567~threonine catabolic process	3	0.453858	0.0106492	WBGENE00011291, WBGENE00012007, WBGENE00010456	394	5	11627	17.7061	0.994137	0.373236	14.2119
GOTERM_BP_DIRECT	GO:0035999~tetrahydrofolate interconversion	3	0.453858	0.0106492	WBGENE00003214, WBGENE00015512, WBGENE00013708	394	5	11627	17.7061	0.994137	0.373236	14.2119
GOTERM_BP_DIRECT	GO:0007218~neuropeptide signaling pathway	9	1.36157	0.0124794	WBGENE00003766, WBGENE00003767, WBGENE00003768, WBGENE00003769, WBGENE00003762, WBGENE00003763, WBGENE00003765, WBGENE00001449, WBGENE00015046	394	92	11627	2.88686	0.997589	0.394873	16.4564
GOTERM_MF_DIRECT	GO:0004298~threonine-type endopeptidase activity	4	0.605144	0.0127027	WBGENE00003925, WBGENE00003953, WBGENE00003923, WBGENE00003952	344	14	9479	7.87292	0.975142	0.369866	15.6217
GOTERM_BP_DIRECT	GO:0006508~proteolysis	22	3.32829	0.01428	WBGENE00006947, WBGENE00016283, WBGENE00003526, WBGENE00003925, WBGENE00003959, WBGENE00003548, WBGENE00019212, WBGENE00000083, WBGENE00000039, WBGENE00020646, WBGENE00003923, WBGENE00003528, WBGENE00003952, WBGENE00021213, WBGENE00006592, WBGENE00013895, WBGENE00000254, WBGENE00012796, WBGENE00009809, WBGENE00000255, WBGENE00004468, WBGENE00021844	394	370	11627	1.75466	0.998996	0.412019	18.6111
GOTERM_BP_DIRECT	GO:0008152~metabolic process	50	7.5643	0.0156551	WBGENE00015369, WBGENE00016657, WBGENE00009483, WBGENE00010888, WBGENE00015048, WBGENE00007130, WBGENE00015332, WBGENE00017783, WBGENE00016150, WBGENE00019939, WBGENE00001772, WBGENE00017336, WBGENE00016996, WBGENE00001078, WBGENE00007402, WBGENE00007331, WBGENE00008370, WBGENE00006518, WBGENE00015483, WBGENE00019232, WBGENE00020166, WBGENE00001760, WBGENE00001761, WBGENE00001428, WBGENE00001429,…	394	1063	11627	1.38806	0.999486	0.417829	20.2217
GOTERM_BP_DIRECT	GO:0008652~cellular amino acid biosynthetic process	4	0.605144	0.0214402	WBGENE00009636, WBGENE00019489, WBGENE00010988, WBGENE00010759	394	18	11627	6.55781	0.99997	0.500201	26.6783
GOTERM_MF_DIRECT	GO:0008237~metallopeptidase activity	11	1.66415	0.0233821	WBGENE00016283, WBGENE00006592, WBGENE00003526, WBGENE00003548, WBGENE00012796, WBGENE00019212, WBGENE00009809, WBGENE00000083, WBGENE00000039, WBGENE00003528, WBGENE00020646	344	134	9479	2.262	0.998927	0.532213	26.9748
GOTERM_MF_DIRECT	GO:0016853~isomerase activity	7	1.059	0.0276851	WBGENE00015483, WBGENE00019154, WBGENE00007130, WBGENE00000882, WBGENE00008132, WBGENE00001428, WBGENE00001429	344	64	9479	3.01385	0.999701	0.555756	31.1359
GOTERM_CC_DIRECT	GO:0000502~proteasome complex	5	0.75643	0.0278583	WBGENE00003925, WBGENE00003953, WBGENE00004468, WBGENE00003923, WBGENE00003952	368	36	11373	4.29235	0.949958	0.348086	27.1695
GOTERM_BP_DIRECT	GO:0009086~methionine biosynthetic process	3	0.453858	0.0278783	WBGENE00009636, WBGENE00019489, WBGENE00010988	394	8	11627	11.0663	0.999999	0.571827	33.2906
GOTERM_MF_DIRECT	GO:0016758~transferase activity, transferring hexosyl groups	8	1.21029	0.0302836	WBGENE00007885, WBGENE00015369, WBGENE00019232, WBGENE00008486, WBGENE00015692, WBGENE00017336, WBGENE00015693, WBGENE00007402	344	83	9479	2.65593	0.999862	0.554219	33.5415
GOTERM_MF_DIRECT	GO:0008233~peptidase activity	15	2.26929	0.032911	WBGENE00006947, WBGENE00016283, WBGENE00003526, WBGENE00003925, WBGENE00003548, WBGENE00019212, WBGENE00000083, WBGENE00003923, WBGENE00003528, WBGENE00020646, WBGENE00003952, WBGENE00006592, WBGENE00012796, WBGENE00000254, WBGENE00021844	344	224	9479	1.84522	0.999937	0.553334	35.8947
GOTERM_CC_DIRECT	GO:0043231~intracellular membrane-bounded organelle	9	1.36157	0.0339592	WBGENE00007885, WBGENE00015369, WBGENE00015660, WBGENE00019232, WBGENE00008486, WBGENE00015692, WBGENE00017336, WBGENE00015693, WBGENE00007402	368	116	11373	2.39779	0.974324	0.367312	32.1369
GOTERM_MF_DIRECT	GO:0016671~oxidoreductase activity, acting on a sulfur group of donors, disulfide as acceptor	3	0.453858	0.0397198	WBGENE00021548, WBGENE00018419, WBGENE00020917	344	9	9479	9.18508	0.999992	0.593843	41.6388
GOTERM_BP_DIRECT	GO:1990170~stress response to cadmium ion	3	0.453858	0.0428539	WBGENE00008296, WBGENE00000412, WBGENE00010470	394	10	11627	8.85305	1	0.709655	46.5865
GOTERM_BP_DIRECT	GO:0050482~arachidonic acid secretion	3	0.453858	0.0428539	WBGENE00019236, WBGENE00018411, WBGENE00013127	394	10	11627	8.85305	1	0.709655	46.5865
GOTERM_MF_DIRECT	GO:0003824~catalytic activity	21	3.177	0.0443047	WBGENE00011416, WBGENE00044924, WBGENE00010055, WBGENE00011420, WBGENE00012007, WBGENE00019329, WBGENE00001078, WBGENE00013284, WBGENE00000984, WBGENE00009813, WBGENE00000929, WBGENE00017262, WBGENE00020052, WBGENE00011291, WBGENE00006518, WBGENE00003214, WBGENE00020166, WBGENE00007130, WBGENE00016150, WBGENE00022817, WBGENE00019620	344	367	9479	1.57673	0.999998	0.607592	45.2345
GOTERM_MF_DIRECT	GO:0004222~metalloendopeptidase activity	9	1.36157	0.0478006	WBGENE00016283, WBGENE00006592, WBGENE00003526, WBGENE00003548, WBGENE00012796, WBGENE00019212, WBGENE00000083, WBGENE00003528, WBGENE00020646	344	111	9479	2.23421	0.999999	0.610813	47.8373
GOTERM_MF_DIRECT	GO:0004623~phospholipase A2 activity	3	0.453858	0.0484841	WBGENE00019236, WBGENE00018411, WBGENE00013127	344	10	9479	8.26657	0.999999	0.592488	48.3326
GOTERM_BP_DIRECT	GO:0009116~nucleoside metabolic process	3	0.453858	0.0512293	WBGENE00022817, WBGENE00020036, WBGENE00020557	394	11	11627	8.04822	1	0.753982	52.9022
GOTERM_BP_DIRECT	GO:0044237~cellular metabolic process	3	0.453858	0.0601322	WBGENE00010661, WBGENE00044924, WBGENE00010988	394	12	11627	7.37754	1	0.791272	58.8493
GOTERM_MF_DIRECT	GO:0016787~hydrolase activity	38	5.74887	0.063683	WBGENE00004801, WBGENE00016283, WBGENE00008655, WBGENE00016657, WBGENE00003925, WBGENE00003526, WBGENE00003548, WBGENE00015645, WBGENE00019329, WBGENE00020784, WBGENE00000963, WBGENE00003528, WBGENE00020646, WBGENE00003923, WBGENE00015048, WBGENE00012796, WBGENE00019939, WBGENE00019620, WBGENE00009142, WBGENE00018359, WBGENE00021844, WBGENE00003476, WBGENE00006947, WBGENE00006921, WBGENE00020947,…	344	793	9479	1.32043	1	0.67327	58.2843
GOTERM_BP_DIRECT	GO:0006850~mitochondrial pyruvate transport	2	0.302572	0.0664616	WBGENE00011119, WBGENE00018765	394	2	11627	29.5102	1	0.808057	62.644
GOTERM_BP_DIRECT	GO:0009236~cobalamin biosynthetic process	2	0.302572	0.0664616	WBGENE00020169, WBGENE00022766	394	2	11627	29.5102	1	0.808057	62.644
GOTERM_BP_DIRECT	GO:0045454~cell redox homeostasis	6	0.907716	0.0756875	WBGENE00021548, WBGENE00017340, WBGENE00015510, WBGENE00019717, WBGENE00020917, WBGENE00013263	394	67	11627	2.6427	1	0.834531	67.5957
GOTERM_BP_DIRECT	GO:0007017~microtubule-based process	4	0.605144	0.0794489	WBGENE00010888, WBGENE00022631, WBGENE00006534, WBGENE00006535	394	30	11627	3.93469	1	0.835718	69.4334
GOTERM_BP_DIRECT	GO:0006457~protein folding	7	1.059	0.0804929	WBGENE00021548, WBGENE00015510, WBGENE00020917, WBGENE00000882, WBGENE00001031, WBGENE00001428, WBGENE00001429	394	89	11627	2.32102	1	0.826455	69.926
GOTERM_MF_DIRECT	GO:0008080~N-acetyltransferase activity	4	0.605144	0.0858834	WBGENE00011042, WBGENE00009483, WBGENE00008408, WBGENE00017658	344	29	9479	3.80072	1	0.763485	69.6728
GOTERM_MF_DIRECT	GO:0016829~lyase activity	7	1.059	0.0948316	WBGENE00015010, WBGENE00022104, WBGENE00009813, WBGENE00011291, WBGENE00020397, WBGENE00000245, WBGENE00010759	344	87	9479	2.21709	1	0.7803	73.3886
GOTERM_BP_DIRECT	GO:0040018~positive regulation of multicellular organism growth	18	2.72315	0.097708	WBGENE00001699, WBGENE00006947, WBGENE00003526, WBGENE00001694, WBGENE00004858, WBGENE00000083, WBGENE00000437, WBGENE00020784, WBGENE00000039, WBGENE00003017, WBGENE00001077, WBGENE00019154, WBGENE00001070, WBGENE00019620, WBGENE00007934, WBGENE00001703, WBGENE00001702, WBGENE00006956	394	357	11627	1.48791	1	0.872079	77.0559
GOTERM_BP_DIRECT	GO:0060548~negative regulation of cell death	2	0.302572	0.0980212	WBGENE00018656, WBGENE00013263	394	3	11627	19.6734	1	0.862035	77.1697
GOTERM_BP_DIRECT	GO:0006729~tetrahydrobiopterin biosynthetic process	2	0.302572	0.0980212	WBGENE00015010, WBGENE00020397	394	3	11627	19.6734	1	0.862035	77.1697
