# Supplementary material for: Temporal dynamics of gene expression in heat-stressed Caenorhabditis elegans
Source: PLoS One. 2017 Dec 11;12(12):e0189445. doi: 10.1371/journal.pone.0189445 (PMC5724892; doi:10.1371/journal.pone.0189445)
Supplement: S2 Table — Approximately 100 L4-stage animals per heat stress duration (1h, 2h, 3h, 4h, 6h, 8h, and 12h) were scored directly after removal from 35°C, and after overnight recovery. This experiment was performed separately from the phenotypic recovery experiment, due to the chance of damaging the animals in an effort to provoke movement directly after the stress exposure. (XLSX) [file pone.0189445.s005.xlsx]

## Sheet: Sheet1
		Day 0 (scored directly without recovery period)				Day 1 (scored after over night recovery, i.e. approximately 12-20hours post stress)
HS duration (hours at 35°C)	Replica	Total	Dead (#)	Dead (%)	Average Survival (%)	Total	Censored (suicide)	Total	Dead (#)	Dead (%)	Average Survival (%)
1	1	28	0	0	100	28	0	25	0	0	99.0826
	2	87	0	0		87	3	84	1	1.19048
2	1	37	0	0	100	37	0	37	0	0	100
	2	68	0	0		68	0	68	0	0
3	1	33	0	0	100	33	3	30	1	3.33333	97.0874
	2	78	0	0		75	2	73	2	2.73973
4	1	40	0	0	100	37	8	29	0	0	96.25
	2	52	0	0		52	1	51	3	5.88235
6	1	42	7	16.6667	90.2174	42	0	42	15	35.7143	59.7826
	2	50	2	4		50	0	50	22	44
8	1	46	8	17.3913	85.4369	47	0	47	35	74.4681	21.1538
	2	57	7	12.2807		57	0	57	47	82.4561
12	1	44	24	54.5455	53.6082	44	0	44	44	100	0
	2	53	21	39.6226		53	0	53	53	100
